# Supplementary material for: Ultrastructural sublaminar-specific diversity of excitatory synaptic boutons in layer 1 of the adult human temporal lobe neocortex
Source: eLife. 2025 Jul 21;13:RP99473. doi: 10.7554/eLife.99473 (PMC12279374; doi:10.7554/eLife.99473)
Supplement: Source data 1. [file elife-99473-data1.xlsx]

## Sheet: Syn_Density
Measurements of the synaptic density in L1a and L1b of the human TLN
Hu_01_L1a		15	16	17	18	19	20	21	22	23	24	25	26	27	28	29	30	31	32	33	34
	shaft	12	9	7	1	5	2	0	1	1	5	6	4	0	5	5	3	3	7	1	3
	mushroom	7	1	3	0	1	1	0	1	2	2	0	1	1	1	0	2	1	0	2	2
	stubby	18	4	4	3	2	6	1	2	3	3	3	2	3	7	7	10	6	4	0	3
	thin	2	6	4	2	0	0	2	2	2	1	4	2	3	1	1	6	2	2	1	2
	n.a.	8	7	4	1	1	1	0	0	0	0	0	0	0	0	0	0	0	0	0	0
	sum	47	27	22	7	9	10	3	6	8	11	13	9	7	14	13	21	12	13	4	10
	spine AP	5	3	3	3	3	3	1	3	0	7	3	0	3	7	5	5	3	1	4	2
Hu_02_L1a		1	2	3	4	5	6	7	8	9	10	11	12	13	14	15	16	17	18	19	20
	shaft	5	4	2	4	4	3	2	7	2	5	8	2	2	2	0	1	3	2	5	1
	mushroom	10	2	0	0	1	3	1	2	1	3	0	0	1	0	1	2	2	1	3	2
	stubby	20	15	3	12	1	6	2	9	2	5	10	1	1	3	6	3	1	3	2	2
	thin	6	1	0	0	2	2	1	3	1	1	9	2	2	2	1	2	4	2	1	1
	n.a.	3	4	1	0	1	0	0	2	0	3	5	0	0	1	0	1	0	1	1	0
	sum	44	26	6	16	9	14	6	23	6	17	32	5	6	8	8	9	10	9	12	6
	spine AP	3	5	2	2	3	4	2	3	1	2	4	2	5	4	2	3	3	2	1	3
Hu_03_L1a		9	10	11	12	13	14	15	16	17	18	19	20	21	22	23	24	25	26	27	28
	shaft	6	0	1	1	0	1	0	1	3	1	0	0	0	0	0	1	0	1	1	0
	mushroom	2	0	1	1	0	0	0	1	0	0	1	3	0	0	0	0	2	1	0	1
	stubby	31	4	7	1	0	8	4	4	11	0	3	3	4	2	0	3	0	0	2	1
	thin	6	1	0	0	2	7	2	0	4	0	1	0	0	0	1	1	1	2	1	0
	n.a.	2	0	0	0	0	6	0	1	2	1	2	0	3	1	1	6	0	1	0	3
	sum	47	5	9	3	2	22	6	7	20	2	7	6	7	3	2	11	3	5	4	5
	spine AP	3	5	2	2	3	4	2	3	1	2	4	2	5	4	2	3	3	2	1	3
Hu_01_L1b		6	7	8	9	10	11	12	13	14	15	16	17	18	19	20	21	22	23	24	25
	shaft	2	7	1	0	0	0	0	1	3	1	3	3	1	0	1	4	4	2	2	1
	mushroom	5	0	1	1	0	1	0	1	1	1	1	1	1	0	1	2	0	0	0	2
	stubby	30	5	4	4	2	1	1	3	9	5	10	2	3	3	2	6	1	4	3	0
	thin	8	4	5	1	2	1	1	1	3	2	3	0	0	2	1	5	2	1	0	2
	n.a.	4	1	1	2	1	0	0	1	2	2	4	0	0	1	0	3	1	0	1	1
	sum	49	17	12	8	5	3	2	7	18	11	21	6	5	6	5	20	8	7	6	6
	spine AP	5	6	2	2	1	1	5	2	3	2	6	3	6	1	2	3	3	2	2	3
Hu_02_L1b		13	14	15	16	17	18	19	20	21	22	23	24	25	26	27	28	29	30	31	32
	shaft	10	2	0	3	2	2	2	2	4	2	1	2	3	2	2	2	1	6	2	0
	mashroom	5	1	1	0	1	0	0	0	1	0	0	3	3	1	0	0	0	1	0	0
	stuby	20	8	0	3	6	3	0	4	4	3	0	3	3	2	5	2	4	5	9	6
	th	1	1	7	3	1	3	2	2	1	0	0	4	0	5	1	0	3	4	5	0
	n	2	1	0	1	0	1	0	0	1	1	0	0	0	1	0	1	0	1	0	0
	sum:	38	13	8	10	10	9	4	8	11	6	1	12	9	11	8	5	8	17	16	6
	Spine AP	4	5	2	3	2	2	4	2	2	3	5	2	5	2	2	4	2	1	3	2
Hu_04_L1b		22	23	24	25	26	27	28	29	30	31	32	33	34	35	36	37	38	39	40	41
	shaft	5	3	0	4	3	1	2	0	0	0	2	3	0	1	1	2	2	1	0	1
	mashroom	1	1	0	0	2	1	1	2	1	1	2	0	3	0	1	4	0	0	0	0
	stuby	21	8	2	3	6	6	4	6	6	1	5	0	9	5	6	8	9	2	1	6
	th	2	5	0	3	2	0	3	3	2	0	5	1	4	2	1	3	3	1	0	2
	n	1	1	0	0	0	0	0	0	1	1	0	0	1	0	1	1	0	0	1	0
	sum:	30	18	2	10	13	8	10	11	10	3	14	4	17	8	10	18	14	4	2	9
	Spine AP	2	5	3	2	1	1	4	2	3	1	5	3	4	2	3	1	2	4	3	5
