# Supplementary material for: Ultrastructural sublaminar-specific diversity of excitatory synaptic boutons in layer 1 of the adult human temporal lobe neocortex
Source: eLife. 2025 Jul 21;13:RP99473. doi: 10.7554/eLife.99473 (PMC12279374; doi:10.7554/eLife.99473)
Supplement: Source data 2. [file elife-99473-data2.xlsx]

## Sheet: 01_Analysis_Complete
Analysis of structual and functional parameters of SBs in L1a and L1b of the human TLN
	bname	bnum	bdate	bxpos	bypos	bzpos	bvol	bvol.pcavalieri	barea	bsphericity	bAZ.num	bpre-AZ.area	bpre_AZ.sd	bpre_AZ.peri	bpre_AZ.dist.mean	bpre_AZ.dist.sd	bpsd.area	bpsd.peri	bpsd.dist.mean	bpsd.dist.sd	bmito.num	bmito.vol	bmito.pvol	bves.num	bves.vol	bves.pvol	bves.diam.mean	bves.diam.sd	bves.p10	bves.p20	bves.p30	bves.p40	bves.p50	bves.p60	bves.p70	bves.p80	bves.p90	bves.p100	bves.p200	bves.p300	bves.p400	bves.p500
1	Hu_01_L1a	1	20200715	-3474.78	2651.16	3433.8	0.721102	99.7935	7.55523	0.514716	1	0.262713	NA	3.71742	10.7558	2.83699	0.259759	3.67562	15.2191	6.50248	1	0.0385041	5.33961	4785	0.055217	7.65731	26.4457	6.66324	3	11	16	30	43	60	77	95	112	140	488	769	947	1120
2	Hu_01_L1a	2	20200715	-4215.52	-4.96724	3050.7	1.4856	100.151	12.9631	0.485709	1	0.902234	NA	10.3585	9.46765	3.58053	1.15626	13.275	16.5687	5.27774	1	0.113689	7.65272	7293	0.12811	8.62345	30.5786	7.28736	39	101	154	205	261	309	351	402	456	511	1085	1749	2443	3090
3	Hu_01_L1a	3	20200715	-5944.63	5362.21	1855.92	2.25655	100.266	17.891	0.465028	2	0.483638	0.422279	6.73384	11.3114	4.72099	0.558633	7.63954	31.2407	290.14	3	0.353303	15.6568	12617	0.141402	6.26628	26.3168	6.28184	17	85	145	217	277	359	431	503	579	652	1456	2217	2880	3523
4	Hu_01_L1a	4	20200715	-3021.7	3591.64	1026.54	0.821595	99.8807	7.61186	0.557312	1	0.536482	NA	6.98099	12.3173	4.15572	0.691116	8.99317	22.0005	7.00195	1	0.0724331	8.81616	4623	0.0620709	7.55493	28.2562	5.99656	0	21	53	92	131	165	219	256	298	341	793	1200	1486	1706
5	Hu_01_L1a	5	20200715	3823.91	759.728	1353.92	0.494988	99.6766	4.89813	0.617803	1	0.0801131	NA	2.18485	10.6896	3.89534	0.157328	4.29065	17.4204	5.2975	1	0.0163552	3.30416	3204	0.0461547	9.32442	28.9277	6.14084	7	29	51	74	89	103	119	139	159	174	345	526	717	912
6	Hu_01_L1a	7	20200715	-5490.51	4177.7	1349.64	0.955625	100.314	8.10756	0.578699	1	0.361041	NA	5.06013	15.7093	5.53377	0.41942	5.87832	23.4356	8.69856	1	0.114149	11.9449	3039	0.0473639	4.95633	29.5351	6.65342	0	13	39	68	92	116	141	170	193	218	428	594	723	831
7	Hu_01_L1a	8	20200715	-6130.31	869.662	2398.41	1.92515	100.239	12.9834	0.57642	1	0.50521	NA	8.16428	16.5935	5.28821	0.66794	10.794	34.249	9.46986	2	0.185918	9.65729	6540	0.0883275	4.58807	28.0303	6.61725	0	6	33	56	83	112	135	158	184	203	476	789	1035	1233
8	Hu_01_L1a	9	20200715	-3396.99	990.749	2805.14	0.319165	98.3014	3.52329	0.641032	1	0.013281	NA	0.525315	12.4706	3.27845	0.0261546	1.03452	16.5398	3.94358	2	0.0624009	19.5513	1124	0.0158492	4.96582	28.4945	6.57887	0	5	10	17	20	22	28	37	45	55	124	164	196	241
9	Hu_01_L1a	10	20200715	-2538.34	2762.57	2670.97	1.10388	100.702	9.24565	0.558677	2	0.274607	0.123966	3.31554	11.602	5.09568	0.312458	3.78894	22.1662	7.60002	2	0.135109	12.2395	1587	0.0265276	2.40313	30.8713	5.18761	0	7	19	31	42	57	70	79	87	97	212	315	413	495
10	Hu_01_L1a	11	20200715	-7008.28	-666.387	3113.48	0.919944	99.507	8.05042	0.568207	1	0.399423	NA	5.31553	12.2447	4.47813	0.425012	5.65606	18.307	5.94959	2	0.100391	10.9128	4268	0.0766096	8.32764	31.0333	6.81904	10	54	80	112	144	170	197	227	270	297	586	886	1163	1376
11	Hu_01_L1a	12	20200715	-2360.59	232.925	3053.55	0.535091	100.024	5.09101	0.626083	1	0.115564	NA	1.35957	11.2524	4.01165	0.166458	1.95831	14.9286	3.90035	1	0.0763594	14.2704	1345	0.0175123	3.27277	27.4774	6.96375	9	13	22	26	34	42	51	61	68	70	157	257	313	328
12	Hu_01_L1a	13	20200715	-5218.86	70.4354	1581.97	1.40536	100.139	10.7748	0.563118	1	0.523464	NA	7.51659	11.6568	6.38794	0.640782	9.20119	21.0886	7.09823	1	0.146062	10.3932	5465	0.063249	4.50055	26.6496	6.25444	9	48	79	121	153	192	241	274	331	377	833	1298	1711	2155
13	Hu_01_L1a	14	20200715	-1774.91	6520.46	1248.92	1.09364	99.624	7.8596	0.653131	1	0.318257	NA	4.52882	7.66693	3.1519	0.557836	7.93807	18.8212	9.36077	1	0.124264	11.3624	6106	0.100301	9.1713	30.1069	6.67925	17	44	80	106	134	166	206	232	251	291	613	950	1337	1673
14	Hu_01_L1a	15	20200715	-1725.77	-2081.86	3142.79	1.16521	99.8807	8.79193	0.609072	2	0.18674	0.166506	2.5679	9.04861	4.45562	0.453905	6.50507	18.7122	7.31636	1	0.127695	10.959	7507	0.0872205	7.48541	26.6366	6.34717	18	52	74	110	138	165	209	244	273	319	770	1272	1799	2402
15	Hu_01_L1a	16	20200715	-839.736	-4075.84	1243.43	0.558733	98.8113	5.33179	0.615291	1	0.24773	NA	3.41966	9.23531	4.56397	0.275877	3.8082	17.6459	8.17767	1	0.0847429	15.167	2469	0.0335752	6.00917	28.2725	6.26924	7	32	54	70	90	110	130	153	171	193	429	676	875	1073
16	Hu_01_L1a	17	20200715	-2987.7	3493.67	1507.16	0.844642	100.269	6.82041	0.633562	1	0.391273	NA	5.35658	6.55162	3.52038	0.437497	5.98939	27.5877	7.96224	1	0.0672692	7.96423	4170	0.0852232	10.0899	32.2588	7.46516	34	75	106	131	157	181	203	223	247	270	421	562	711	871
17	Hu_01_L1a	18	20200715	-2721.29	1469.35	2151.83	0.166508	100.097	1.98059	0.739002	1	0.0920588	NA	1.43759	6.44733	4.0606	0.11436	1.78585	22.8361	6.64343	0	NA	NA	1218	0.0143686	8.62935	26.9116	6.084	14	28	41	51	58	73	86	100	111	130	265	380	442	460
18	Hu_01_L1a	19	20200715	278.985	2724.7	1083.9	0.418704	99.8086	4.27827	0.632636	1	0.323464	NA	3.23677	8.18387	3.73822	0.512293	5.12631	18.0374	8.1776	1	0.0521527	12.4557	2580	0.0316646	7.56252	27.432	5.82317	15	36	59	90	117	143	175	201	229	250	497	646	745	801
19	Hu_01_L1a	20	20200715	-2375.07	3595.15	1572.31	0.494052	100.459	5.61741	0.538017	0	0.323464	NA	3.23677	8.18387	3.73822	0.512293	5.12631	18.0374	8.1776	1	0.0776024	15.7073	1424	0.0175805	3.55843	27.5167	5.75525	NA	NA	NA	NA	NA	NA	NA	NA	NA	NA	NA	NA	NA	NA
20	Hu_01_L1a	21	20200715	-4339	4533.88	3053.39	0.71706	99.2383	6.16241	0.628691	1	0.37343	NA	5.23829	10.2545	5.04621	0.369628	5.18496	12.5086	4.84959	2	0.103201	14.3922	3315	0.0424693	5.9227	27.6522	6.27254	10	34	57	89	116	146	163	196	217	238	510	742	949	1126
21	Hu_01_L1a	23	20200715	-230.065	-1624.27	2747.89	0.556212	99.6683	5.66365	0.577494	1	0.23599	NA	4.05805	10.2919	3.88859	0.264219	4.54346	17.505	6.52863	3	0.0954677	17.1639	2061	0.0247953	4.45788	27.0217	6.25561	4	33	56	77	90	112	131	148	167	190	416	680	901	1024
22	Hu_01_L1a	24	20200715	-918.697	-1885.31	2509.72	0.490358	100.342	4.56564	0.658655	1	0.223912	NA	3.92805	13.236	3.95284	0.253433	4.44594	16.768	8.0062	1	0.03941	8.03699	2558	0.0319318	6.51194	27.4354	6.17598	0	15	40	67	92	113	135	159	185	212	475	804	1104	1317
23	Hu_01_L1a	25	20200715	1444.53	-2123.1	1586.94	0.124405	92.9047	2.07569	0.580604	1	0.0430979	NA	0.730134	8.9934	2.53738	0.0591405	1.00192	16.4585	6.47889	0	NA	NA	848	0.0086138	6.92401	25.4837	6.05173	3	9	20	26	35	44	49	60	71	87	215	380	464	516
24	Hu_01_L1a	26	20200715	1126.71	-2736.5	1922.38	0.25569	96.1723	3.67802	0.529678	1	0.0905575	NA	1.53196	6.68391	3.1455	0.120818	2.04388	14.354	3.62346	1	0.0336616	13.165	985	0.00865612	3.3854	24.4575	5.40741	6	15	27	40	53	64	71	85	96	106	207	292	401	512
25	Hu_01_L1a	28	20200715	-2827.6	5068.98	1147.05	0.21681	94.0737	3.63408	0.48026	0	0.0905575	NA	1.53196	6.68391	3.1455	0.120818	2.04388	14.354	3.62346	0	NA	NA	1494	0.0149797	6.90912	25.3638	5.99914	NA	NA	NA	NA	NA	NA	NA	NA	NA	NA	NA	NA	NA	NA
26	Hu_01_L1a	29	20200715	-7660.33	3784.31	1569.52	0.174603	97.9817	2.30952	0.654127	0	0.0905575	NA	1.53196	6.68391	3.1455	0.120818	2.04388	14.354	3.62346	1	0.0353045	20.2199	624	0.00789065	4.5192	27.6755	5.92204	NA	NA	NA	NA	NA	NA	NA	NA	NA	NA	NA	NA	NA	NA
27	Hu_01_L1a	30	20200715	-6423.07	4656.31	1005.45	0.427387	99.2911	4.36062	0.62924	1	0.0822418	NA	1.48546	11.4667	4.90379	0.245918	4.44181	17.2988	5.95218	0	NA	NA	2388	0.0328744	7.69197	28.4807	6.11528	1	4	9	15	25	31	36	47	59	69	142	210	297	349
28	Hu_01_L1a	31	20200715	3104.89	228.763	2247.03	1.02957	100.631	9.44665	0.521966	1	0.467062	NA	6.31074	10.8617	4.69122	0.623335	8.42224	23.264	8.4031	0	NA	NA	4187	0.0419014	4.06981	25.4859	5.7022	5	57	95	138	187	232	272	321	383	442	947	1507	1969	2431
29	Hu_01_L1a	32	20200715	-1460.78	4358.05	2541.17	1.26488	100.868	10.3614	0.54588	1	0.314291	NA	5.17003	13.469	4.15075	0.380275	6.25546	18.4998	6.15681	1	0.0823003	6.50657	2348	0.0185699	1.46811	23.3357	5.75463	0	10	23	41	60	80	98	113	131	149	295	421	533	623
30	Hu_01_L1a	33	20200715	-773.113	6180.24	1587.86	0.504624	98.9602	5.2724	0.581372	1	0.209165	NA	3.39803	7.04374	2.53793	0.225616	3.66528	15.0731	6.72515	1	0.045709	9.05803	2390	0.0278487	5.51871	26.814	6.03761	13	27	47	67	86	106	127	148	169	184	385	521	619	669
31	Hu_01_L1a	34	20200715	-364.089	4856.01	1496.38	0.435137	99.6309	5.13018	0.541297	0	0.209165	NA	3.39803	7.04374	2.53793	0.225616	3.66528	15.0731	6.72515	0	NA	NA	3119	0.0334161	7.67944	25.9238	6.21682	NA	NA	NA	NA	NA	NA	NA	NA	NA	NA	NA	NA	NA	NA
32	Hu_01_L1a	35	20200715	-307.57	4235.06	1398.93	0.457415	98.8153	5.13933	0.558622	1	0.18979	NA	2.57167	8.64194	3.21986	0.207475	2.81131	16.0637	6.6936	1	0.0523283	11.44	2378	0.0209263	4.5749	24.0966	6.16628	11	32	52	65	87	108	126	144	162	174	304	426	557	673
33	Hu_01_L1a	36	20200715	4861.89	1653.31	1743.88	0.828971	100.15	8.05686	0.529677	1	0.0456593	NA	1.00346	16.7942	4.87179	0.52799	11.6038	25.0233	8.14848	1	0.0957386	11.5491	4032	0.0327764	3.95386	23.2862	6.3477	0	3	6	10	17	22	28	36	47	51	125	198	277	326
34	Hu_01_L1a	38	20200715	2431.91	3810.61	1087.46	0.441109	99.5669	5.01203	0.559115	1	0.121313	NA	2.33167	8.6262	3.25208	0.230295	4.42634	19.711	8.56425	1	0.0108146	2.45168	3350	0.0260666	5.90933	23.2307	5.69078	2	14	32	52	73	95	111	132	152	167	338	502	668	777
35	Hu_01_L1a	40	20200715	4225.31	3653.59	2466.32	0.303869	98.4018	3.40532	0.641874	1	0.164426	NA	2.47327	7.79552	3.5224	0.198924	2.99219	24.0239	6.53169	1	0.0462479	15.2197	2121	0.0153898	5.06463	22.5268	5.87137	11	54	82	110	135	171	206	239	271	304	499	597	698	847
36	Hu_01_L1a	41	20200715	2437.25	4300.69	2876.69	0.473817	98.8149	5.4747	0.536864	1	0.249187	NA	4.15174	9.31468	3.80813	0.278582	4.6415	14.8675	4.80533	1	0.0748888	15.8054	1408	0.0180205	3.80326	27.5749	6.39745	8	33	55	72	101	132	153	176	200	221	398	530	635	768
37	Hu_01_L1a	42	20200715	4603.36	2380.2	1976.2	1.16706	100.484	9.46361	0.566443	2	0.174378	0.037241	2.16273	11.2085	4.37769	0.271528	3.27531	21.7486	8.0374	1	0.134602	11.5334	4682	0.0407347	3.49036	23.8623	6.35952	1	7	26	52	69	83	96	115	143	167	410	592	758	912
38	Hu_01_L1a	43	20200715	-72.5483	5965.64	2837.16	0.979754	98.3309	6.34482	0.75187	2	0.15345	0.140075	2.49043	13.2307	5.24219	0.144794	2.30928	15.3041	5.55466	1	0.100235	10.2306	3921	0.0708413	7.23052	30.8648	7.38655	2	11	21	31	44	58	80	107	127	153	415	662	905	1164
39	Hu_01_L1a	44	20200715	-1074.23	-1115.67	724.157	0.483873	99.0382	5.4499	0.546911	0	0.15345	0.140075	2.49043	13.2307	5.24219	0.144794	2.30928	15.3041	5.55466	1	0.0988043	20.4195	3465	0.0193325	3.99537	20.1607	6.2042	NA	NA	NA	NA	NA	NA	NA	NA	NA	NA	NA	NA	NA	NA
40	Hu_01_L1a	45	20200715	-2525.16	-2984.8	1020.79	0.618785	100.479	5.47537	0.641353	1	0.276289	NA	3.97223	9.54584	4.29343	0.310152	4.45908	20.5775	8.38792	1	0.0539531	8.71919	4775	0.0269334	4.35263	20.4148	5.9424	5	38	72	107	141	171	202	240	276	313	714	1191	1563	1847
41	Hu_01_L1a	46	20200715	685.748	-5674.23	1440.57	1.04238	100.54	8.34283	0.59592	1	0.201318	NA	3.58086	12.9065	4.2409	0.337204	5.99788	22.5395	6.83069	1	0.101537	9.74085	7315	0.0424577	4.07315	20.3684	6.36631	0	20	42	69	101	128	154	180	203	230	581	931	1229	1482
42	Hu_01_L1a	47	20200715	-785.765	-6662.89	975.44	0.824384	100.506	7.02369	0.605349	1	0.437181	NA	6.3801	12.0589	4.95621	0.412327	6.01738	24.7844	7.88909	2	0.0964796	11.7032	3330	0.0329791	4.00045	24.7472	6.96932	8	41	63	93	116	135	159	175	195	216	383	575	889	1222
43	Hu_01_L1a	48	20200715	878.569	3612.63	1016.43	0.431735	100.641	5.17327	0.533987	1	0.185153	NA	2.75767	7.83349	3.15795	0.383346	5.70955	17.5231	7.52992	0	NA	NA	4561	0.025074	5.80772	20.3293	5.69549	14	46	74	101	138	182	223	269	308	353	758	1223	1609	1806
44	Hu_01_L1a	49	20200715	1146.7	2158.64	837.883	0.338669	99.7465	4.2785	0.549174	1	0.148381	NA	2.32567	7.93941	3.84686	0.215981	3.38519	19.7405	10.7963	0	NA	NA	3767	0.0231348	6.83108	21.1805	5.80837	4	32	55	78	103	126	149	173	202	236	587	957	1310	1620
45	Hu_01_L1a	50	20200706	-4176.47	8268.35	1380.18	0.160783	90.3277	2.5904	0.552007	1	0.149022	NA	2.17132	8.424	3.31078	0.177837	2.59116	17.1229	6.41936	0	NA	NA	2029	0.0090554	5.63206	18.8161	5.53939	3	34	65	110	139	172	200	237	273	314	704	1029	1235	1332
46	Hu_01_L1a	51	20200708	-5226.58	7450.66	1406.79	0.485868	100.434	4.08148	0.732283	1	0.12259	NA	2.61728	7.13659	2.78422	0.204605	4.36828	27.8965	6.96784	0	NA	NA	5398	0.0337785	6.9522	21.2296	5.9703	16	52	83	119	145	176	205	242	265	294	708	1239	1701	2031
47	Hu_01_L1a	54	20200708	-2170.85	7302.09	3316.85	0.710707	101.018	7.61027	0.50607	2	0.0924258	0.0830406	1.6778	15.3754	5.46585	0.0900659	1.67364	20.5935	7.15632	1	0.0512774	7.21498	1961	0.0194729	2.73994	25.3393	5.88285	0	2	15	23	29	40	48	54	62	69	206	357	517	644
48	Hu_01_L1a	55	20200708	-3410.99	7637.64	3940.27	0.413262	94.5077	3.993	0.671947	1	0.217928	NA	3.52527	12.1984	4.36176	0.233248	3.77309	23.5258	8.95821	1	0.0506913	12.2661	1563	0.0142677	3.45246	24.5665	5.81164	3	13	25	37	54	70	83	96	116	131	298	483	676	849
49	Hu_01_L1a	56	20200708	-5349.05	2379.21	3558.67	0.683917	100.511	6.08499	0.616917	1	0.0472856	NA	1.29334	12.4879	3.86247	0.119696	3.27388	19.3234	6.30415	1	0.0799494	11.6899	2206	0.0333837	4.88125	29.3936	6.23951	1	6	13	18	20	24	30	36	39	45	104	202	354	538
50	Hu_01_L1a	57	20200708	-3467.99	-394.662	3722.75	0.114991	96.6639	1.61676	0.707317	1	0.107152	NA	1.75217	11.0321	4.77675	0.116143	1.8992	16.9363	5.51267	0	NA	NA	817	0.00258293	2.24621	16.8895	4.78368	0	6	11	19	36	45	63	78	96	119	374	563	596	607
51	Hu_01_L1a	58	20200708	-6309.52	753.981	3535.32	0.309353	99.125	3.41272	0.648165	1	0.0535055	NA	1.09287	17.7965	6.52107	0.0622893	1.27229	20.6555	6.08009	0	NA	NA	1146	0.00803356	2.59689	22.3252	5.69139	0	0	5	10	16	21	26	29	33	34	85	124	168	216
52	Hu_01_L1a	59	20200708	-4654.68	6580.39	2758.03	0.166375	98.0481	2.08365	0.702078	1	0.0935488	NA	1.60737	10.6586	3.47118	0.104246	1.79117	13.0265	4.04824	1	0.00848889	5.10227	654	0.00487735	2.93154	22.8424	5.74749	0	3	11	14	17	22	31	42	47	60	129	177	208	231
53	Hu_01_L1a	60	20200708	-7348.79	-3114.82	3559.59	0.540472	98.5678	4.99397	0.64252	1	0.255991	NA	3.91194	15.0514	4.24354	0.23245	3.5522	19.4923	6.47983	1	0.0590655	10.9285	1874	0.0148655	2.75046	23.4731	5.51813	0	1	7	20	36	48	55	65	79	90	270	402	526	638
54	Hu_01_L1a	61	20200708	-9166.31	616.802	3199.12	0.137763	98.4631	1.8438	0.699614	1	0.199575	NA	2.65448	8.93286	3.60858	0.191076	2.54144	18.0717	6.79455	0	NA	NA	668	0.00383913	2.78678	21.0386	5.05743	0	11	20	31	40	52	61	76	83	91	167	262	354	448
55	Hu_01_L1a	62	20200708	-9859.47	1399.16	3005.92	0.345408	100.611	4.45316	0.534611	2	0.115863	0.0484381	1.53503	12.7568	4.28431	0.118658	1.57347	14.9053	5.54896	0	NA	NA	617	0.00833095	2.41191	27.9318	6.77503	0	1	10	19	26	29	38	49	59	68	128	166	195	220
56	Hu_01_L1a	63	20200708	-9490.28	1421.23	3741.56	0.35546	99.2853	4.19721	0.578163	1	0.0690455	NA	1.23503	9.47983	4.37248	0.109692	1.96209	17.5946	6.20935	1	0.0221925	6.24333	1499	0.01356	3.81477	24.6507	5.50479	3	6	11	13	21	24	28	33	37	42	83	121	150	170
57	Hu_01_L1a	64	20200708	-10170.2	-269.877	2802.85	0.773382	100.864	6.89619	0.590841	1	0.180611	NA	3.99367	13.1297	4.86579	0.190849	4.22007	15.4866	4.79152	1	0.118827	15.3646	1926	0.027645	3.57455	28.713	6.53816	3	10	20	31	39	56	75	96	115	132	404	664	872	1042
58	Hu_01_L1a	65	20200708	-2749.75	7688.06	1526.16	0.280934	99.7671	2.91856	0.710751	0	0.180611	NA	3.99367	13.1297	4.86579	0.190849	4.22007	15.4866	4.79152	0	NA	NA	1222	0.0174061	6.1958	28.7876	6.17086	NA	NA	NA	NA	NA	NA	NA	NA	NA	NA	NA	NA	NA	NA
59	Hu_01_L1a	66	20200708	-2866.55	7013.76	1805.88	0.275867	98.8196	2.63914	0.776524	1	0.223272	NA	3.30543	8.53722	4.72299	0.247798	3.66852	24.1556	7.10265	0	NA	NA	1391	0.0151525	5.49269	26.3847	5.48599	7	32	41	57	73	88	102	121	147	165	342	541	725	884
60	Hu_01_L1a	67	20200708	-4766.07	883.157	1548.03	0.324658	99.9342	3.07994	0.741696	1	0.13283	NA	2.18575	9.54695	4.80896	0.149828	2.46545	19.4982	6.88521	0	NA	NA	1304	0.0182495	5.62115	28.6772	6.03681	1	15	26	36	42	60	71	83	95	107	219	352	481	595
61	Hu_01_L1a	68	20200708	-2773.18	3091.08	1335.92	0.427345	99.8975	4.02789	0.681176	1	0.070399	NA	1.56934	14.3638	6.53577	0.0789524	1.76001	22.2358	6.77213	1	0.0284274	6.6521	1221	0.0190049	4.4472	29.8836	5.78574	0	6	10	18	28	42	52	65	72	84	178	264	329	383
62	Hu_01_L1a	69	20200708	3037.76	1012.97	966.769	0.67142	100.489	7.39299	0.501565	1	0.10077	NA	1.64307	12.649	4.18571	0.191793	3.12723	22.4379	6.81629	2	0.111834	16.6564	2030	0.0233201	3.47325	26.7972	5.76168	3	8	17	25	37	49	59	72	79	91	197	276	323	385
63	Hu_01_L1a	70	20200708	3702.67	1381.78	1024.31	0.204385	98.1252	2.44115	0.687368	1	0.11227	NA	1.55956	8.83825	6.32731	0.14561	2.02268	25.01	7.59045	0	NA	NA	1476	0.0124435	6.08827	23.4173	6.75495	1	14	27	40	50	67	76	84	95	108	200	275	332	347
64	Hu_01_L1b	1	20211013	1853.52	3686.81	1028.61	0.705245	101.072	5.8113	0.659332	1	0.236764	NA	3.83169	15.8094	5.38663	0.255375	4.13288	15.0355	6.59633	1	0.0944975	13.3993	2141	0.0505285	7.16468	34.3049	6.70337	0	2	18	37	49	69	86	99	126	145	283	412	567	666
65	Hu_01_L1b	2	20211013	3289.44	3924.31	1377.98	0.865027	100.602	7.14605	0.614381	1	0.317834	NA	5.02214	66.6393	437.216	0.328046	5.18351	16.577	10.0755	1	0.100814	11.6544	2451	0.0568832	6.57588	34.2738	6.24976	0	0	0	0	0	7	22	38	59	86	338	619	875	1132
66	Hu_01_L1b	3	20211013	3178.57	1958.27	1578.42	0.598172	100.91	5.85292	0.586583	1	0.141638	NA	2.7663	71.4791	388.06	0.14027	2.73959	17.8738	10.2223	1	0.0543061	9.07869	1258	0.030205	5.04955	34.6196	6.41423	0	0	0	0	0	0	0	1	2	10	103	154	198	225
67	Hu_01_L1b	4	20211013	2973.47	1140.7	679.541	0.282875	99.7719	3.01386	0.691446	1	0.132172	NA	2.32144	22.1986	6.28372	0.135136	2.3735	30.9995	110.148	0	NA	NA	1081	0.0248357	8.77973	34.2212	6.05493	0	1	8	17	26	34	44	65	75	82	223	367	531	668
68	Hu_01_L1b	5	20211013	-12.2411	-1159.18	1383.29	0.778022	100.372	8.88066	0.460645	1	0.111019	NA	4.31477	17.5589	9.24715	0.17015	6.61294	63.6789	466.084	1	0.0517138	6.64683	2004	0.0434793	5.58844	33.6179	5.78001	0	6	24	36	51	70	85	105	126	143	323	496	621	689
69	Hu_01_L1b	6	20211013	6157.44	-254.775	1514.51	0.425372	102.153	5.12226	0.533992	1	0.18424	NA	2.64155	25.0722	77.0388	0.219172	3.14238	22.7292	71.8071	1	0.00792761	1.86369	1655	0.0311527	7.32364	31.9217	5.90347	0	2	14	32	47	76	95	113	139	161	396	636	861	1064
70	Hu_01_L1b	7	20211013	1758.12	3081.76	1403.66	1.13194	101.905	11.2805	0.465624	1	0.200929	NA	3.53856	18.5748	8.6838	0.250501	4.41156	23.5376	11.2268	1	0.105714	9.33923	2896	0.0533486	4.71303	31.5674	6.23576	0	6	18	33	49	60	76	90	110	120	305	455	595	782
71	Hu_01_L1b	8	20211013	566.125	386.959	887.944	0.467579	101.09	5.93206	0.491113	1	0.0541572	NA	1.76288	94.7729	453.325	0.0549696	1.78933	17.0317	7.58224	1	0.0565465	12.0935	908	0.0229574	4.90984	35.1624	6.67853	0	0	0	0	0	0	0	0	0	3	51	85	107	152
72	Hu_01_L1b	9	20211013	3757.8	5754.91	3424.58	0.909067	101.041	9.48321	0.478549	2	0.191603	0.174258	2.48188	56.6429	500.742	0.200624	2.60044	19.0982	7.83912	1	0.0659647	7.25631	3220	0.0555952	6.11563	30.5861	6.79391	0	0	0	0	1	27	57	82	107	145	511	938	1419	1795
73	Hu_01_L1b	10	20211013	5420.51	6328.08	3523.03	0.907862	99.5237	7.5296	0.602179	1	0.256135	NA	3.76593	15.6148	6.17258	0.262001	3.85218	27.8589	7.37198	1	0.0634012	6.98357	2387	0.059125	6.51256	35.0541	6.30061	1	10	20	30	39	51	63	76	91	105	244	434	648	890
74	Hu_01_L1b	11	20211013	4708.48	5326.31	3605.52	0.835767	100.788	8.39084	0.51137	1	0.437284	NA	6.90559	87.0712	590.447	0.497416	7.85518	25.1057	6.89431	1	0.103847	12.4254	1627	0.0385034	4.60696	34.4167	6.48504	0	0	0	0	0	0	0	0	3	18	192	339	429	490
75	Hu_01_L1b	12	20211013	6004.4	3611.03	3368.66	0.801425	100.667	8.43255	0.494805	1	0.194709	NA	4.24774	69.7091	503.965	0.221282	4.82745	25.9274	6.01214	1	0.0905655	11.3006	1435	0.0345316	4.30877	34.6747	6.36942	0	0	0	0	0	0	7	30	39	52	190	293	377	462
76	Hu_01_L1b	13	20211013	5847.8	3343.57	3190.47	0.965462	100.272	8.64508	0.546435	1	0	NA	0.911787	33.906	10.95	0	0.861945	28.4965	5.2988	1	0.0773971	8.01659	2229	0.0556015	5.75906	35.044	6.54397	0	0	0	0	0	0	0	0	0	0	0	0	0	0
77	Hu_01_L1b	14	20211013	158.693	3872.64	3184.54	1.46949	101.17	16.4994	0.378843	2	0.39955	0.470083	4.25046	32.5826	272.454	0.390201	4.31838	46.5288	234.462	1	0.155565	10.5864	2193	0.0421241	2.86658	31.921	6.48634	0	0	6	32	65	89	128	168	204	240	545	764	936	1107
78	Hu_01_L1b	15	20211013	3673.22	761.442	3726.01	0.612236	99.3761	6.30358	0.55315	1	0.105391	NA	1.63752	11.2141	3.90463	0.092167	1.43205	29.5491	6.28328	1	0.0676167	11.0442	1053	0.024697	4.03391	34.2122	6.72584	0	2	6	9	16	16	19	30	37	39	73	112	149	202
79	Hu_01_L1b	16	20211013	-1420.28	7755.19	2956.84	0.498604	98.0078	5.49612	0.553263	1	0.207349	NA	2.74185	14.2817	6.29317	0.229793	3.03863	22.0942	6.48452	1	0.0762584	15.2944	1219	0.017772	3.56435	29.2373	5.65403	0	7	17	28	40	51	64	77	85	99	227	351	434	472
80	Hu_01_L1b	18	20211013	2.36563	3413.52	2965.27	0.468503	99.1923	5.74662	0.507629	1	0.146671	NA	3.2176	20.013	8.00378	0.150134	3.29357	25.9997	7.5416	1	0.045522	9.71648	1473	0.0307075	6.55439	33.1223	5.86319	0	1	9	22	34	43	52	64	74	88	202	286	340	379
81	Hu_01_L1b	19	20211013	-358.006	1777.05	2133.14	1.24869	101.546	10.8993	0.514502	2	0.132714	0.091825	3.21833	24.5729	34.095	0.108533	2.61242	23.0529	9.262	1	0.106072	8.49466	4031	0.0661807	5.30003	30.3685	6.01482	0	0	4	26	57	84	119	152	176	211	483	698	834	910
82	Hu_01_L1b	20	20211013	-65.7069	3375.55	3453.24	0.758412	100.996	8.21676	0.489463	1	0.108482	NA	1.99478	25.1593	6.30118	0.112009	2.05963	14.7061	6.70835	1	0.0709462	9.35457	1734	0.0587012	7.74001	38.9518	6.81046	0	1	8	17	28	35	40	54	63	70	165	266	355	422
83	Hu_01_L1b	22	20211014	-3022.76	2855.77	3710.43	0.56889	101.346	5.21078	0.637186	1	0.171091	NA	2.98053	22.5537	5.02229	0.138327	2.40977	39.865	221.992	1	0.087114	15.313	942	0.0235676	4.14273	35.3772	5.72575	0	0	0	1	3	7	10	11	20	21	113	176	205	256
84	Hu_01_L1b	23	20211014	-4240.83	49.6322	2949	0.701505	98.5892	6.3866	0.597817	1	0.0835029	NA	2.17941	21.829	10.8451	0.082286	2.14765	101.687	536.799	1	0.0340252	4.85031	2220	0.0501501	7.14893	33.9569	6.20227	0	0	1	8	13	17	26	32	40	50	145	244	372	535
85	Hu_01_L1b	24	20211014	-3542.32	2530.19	3543.03	0.551552	99.4543	5.50383	0.59094	1	0.0656728	NA	1.68991	30.4825	10.7684	0.0513085	1.32029	17.0194	10.1174	0	NA	NA	1557	0.0382393	6.93305	35.0835	5.91973	0	0	0	1	2	2	6	6	8	10	54	111	155	181
86	Hu_01_L1b	25	20211014	-6259.7	926.648	3425.72	0.765951	100.988	7.20664	0.561762	1	0.0953729	NA	1.36815	23.8876	5.98799	0.164491	2.35967	20.031	7.50128	0	NA	NA	1924	0.0400303	5.22622	32.8242	6.59365	0	1	4	9	12	18	27	31	36	40	86	102	123	148
87	Hu_01_L1b	26	20211014	-5664.66	1540.66	3594.41	0.466415	101.049	5.77121	0.503963	1	0.193042	NA	3.3636	19.5316	7.33804	0.181343	3.15975	16.4773	6.71463	0	NA	NA	1336	0.0207761	4.45441	29.9377	5.59443	0	0	4	13	25	35	46	61	76	91	239	379	526	626
88	Hu_01_L1b	28	20211014	-2612.96	-1178.15	3496.98	0.51485	100.204	4.93818	0.629077	1	0.0774392	NA	1.1167	18.4128	7.43706	0.0703626	1.01465	18.3566	8.94435	1	0.0385479	7.48722	1333	0.0281657	5.47067	33.1267	6.29637	0	2	5	8	11	14	19	24	29	31	87	146	207	246
89	Hu_01_L1b	30	20211014	-5730.27	-4399.25	3224.41	0.835532	100.986	7.8725	0.544937	2	0.0134461	0.00933841	1.02583	22.8101	7.6055	0.01209	1.01086	32.5639	12.5867	1	0.0402144	4.81303	2435	0.0337573	4.04022	28.5891	5.92693	0	0	2	4	5	9	12	18	27	38	98	158	191	213
90	Hu_01_L1b	31	20211014	-3132.72	379.909	3288.03	0.184478	97.413	2.27293	0.689492	1	0.0998258	NA	2.13265	16.2608	8.38812	0.104503	2.23256	20.8582	8.24855	0	NA	NA	730	0.0111892	6.06532	29.5453	6.23464	0	0	2	9	17	26	36	45	51	60	149	198	246	282
91	Hu_01_L1b	32	20211014	-2069.89	-3287.5	3077.47	0.360077	97.7588	3.14058	0.77936	1	0.134182	NA	2.11621	16.0306	5.86855	0.127139	2.00512	11.961	5.0006	0	NA	NA	1358	0.0211838	5.88314	29.884	5.81842	0	2	7	11	19	30	39	47	60	71	180	279	407	479
92	Hu_01_L1b	34	20211014	-5692.87	3999.93	3019.22	1.16631	99.4576	8.61708	0.621823	1	0.174946	NA	8.20292	53.3757	371.091	0.175538	8.23068	97.2667	710.824	1	0.0945733	8.10876	2547	0.0671237	5.75521	35.5981	6.94732	0	0	0	0	2	21	52	78	100	123	366	638	965	1327
93	Hu_01_L1b	38	20211014	-7514.08	1882.39	3199	1.19694	101.45	10.3172	0.528412	1	0.124612	NA	3.02155	110.43	721.53	0.104104	2.52426	19.3786	7.49802	1	0.173654	14.5081	2595	0.0656382	5.48381	35.2748	6.38741	0	0	0	0	0	0	0	0	0	0	61	131	182	201
94	Hu_01_L1b	39	20211014	-9533.55	3940.73	3040.59	0.607959	96.4793	7.15679	0.484934	1	0.0740947	NA	3.78582	254.529	1520.79	0.0718563	3.67145	275.072	1635.84	1	0.0512016	8.42188	1448	0.0402238	6.61621	36.3169	6.82029	0	0	0	0	0	0	0	0	0	0	0	58	192	335
95	Hu_01_L1b	40	20211014	1063.45	-2057.38	3333.97	1.12202	101.306	13.1582	0.396845	1	0.473356	NA	6.51453	23.1611	9.0824	0.514507	7.08086	21.9499	10.6503	1	0.0709185	6.32062	1961	0.0487561	4.34539	35.1038	6.26975	0	6	21	40	61	83	109	119	140	167	353	524	706	875
96	Hu_01_L1b	41	20211014	-546.516	-4412.79	2908.97	0.819941	99.7103	6.8541	0.618096	1	0	NA	1.17463	30.2	10.2693	0	1.06501	29.9295	5.76102	1	0.062051	7.56774	2376	0.0552067	6.733	34.1073	6.72468	0	0	0	1	1	5	8	9	9	10	34	59	67	69
97	Hu_01_L1b	42	20211014	1405.83	-4888.45	3059.14	0.254373	100.686	3.92961	0.494063	1	0.079697	NA	1.61993	13.1272	6.83339	0.105431	2.14301	279.792	965.899	0	NA	NA	1036	0.0114548	4.50313	26.3336	5.89159	0	9	14	21	29	43	56	63	70	82	167	234	289	340
98	Hu_01_L1b	43	20211017	1762.74	-2118.89	3274.09	0.171523	95.1435	2.52564	0.591099	1	0.0584848	NA	1.17653	22.2653	7.89231	0.0713914	1.43616	24.4151	8.02663	0	NA	NA	749	0.00990829	5.77666	28.5337	4.85854	0	0	0	2	4	8	10	10	13	15	64	117	164	177
99	Hu_01_L1b	44	20211014	-714.764	-3866.04	3260.04	0.40311	93.632	5.11601	0.515824	1	0.15774	NA	4.13765	25.5072	9.17904	0.129859	3.4063	24.5343	10.1122	1	0.0251552	6.24028	1235	0.0302391	7.50145	34.8738	6.38542	0	0	3	6	8	17	23	30	43	51	174	303	415	528
100	Hu_01_L1b	45	20211014	-988.139	-3606.34	3235.84	0.232152	95.7321	3.66103	0.498957	1	0.0344536	NA	1.7181	140.644	733.249	0.0339315	1.69207	170.258	949.856	1	0.0208194	8.96799	729	0.0110081	4.74175	28.8421	7.29953	0	0	0	0	0	0	0	0	0	0	40	122	188	273
101	Hu_01_L1b	46	20211018	-385.63	-2959.62	814.514	0.726078	99.8554	6.81074	0.573604	1	0.137204	NA	3.08539	21.5593	7.66337	0.124978	2.81046	81.8305	481.474	1	0.0589035	8.11255	1756	0.0312054	4.2978	31.4239	5.51023	0	0	8	14	27	38	56	61	76	88	193	303	416	555
102	Hu_01_L1b	47	20211018	-2183.88	-1816.95	1282.46	0.986313	100.38	8.42337	0.568863	1	0.323566	NA	5.15061	23.831	7.93016	0.286257	4.55671	13.1563	6.68096	0	NA	NA	2938	0.0630628	6.39379	33.3951	6.07391	0	0	7	14	28	44	66	83	101	120	333	552	776	957
103	Hu_01_L1b	48	20211018	-3634.69	-3015.11	974.101	0.859698	101.041	8.48867	0.515081	1	0.214766	NA	3.58561	20.2427	6.52559	0.222279	3.71105	16.0553	7.19471	1	0.0713264	8.29668	2005	0.0343295	3.9932	31.1249	5.2033	0	5	12	26	38	51	71	82	102	120	246	350	435	528
104	Hu_01_L1b	50	20211014	1533.18	-5472.57	1036.9	0.235861	99.6669	2.7319	0.675756	1	0.0714775	NA	0.968932	263.145	1349	0.0668315	0.905952	16.9402	5.83234	0	NA	NA	605	0.0128821	5.46174	33.1991	6.33421	0	0	0	0	0	0	0	0	0	0	0	14	52	89
105	Hu_01_L1b	51	20211014	1391.3	-7304.35	980.903	0.238567	98.1231	2.88176	0.645505	1	0.0456374	NA	0.678337	15.0989	5.48326	0.0540514	0.803397	22.371	8.00993	1	0.0409638	17.1708	294	0.00554557	2.32454	31.896	6.0578	0	2	4	8	12	15	20	26	29	35	66	100	121	129
106	Hu_01_L1b	52	20211014	-1594.26	-7043.74	1108.29	0.938735	101.36	10.8576	0.427015	1	0.318247	NA	6.77711	96.4474	724.373	0.296256	6.30881	49.4558	441.422	1	0.0888792	9.46798	1906	0.0366132	3.90027	32.0261	6.2583	0	0	0	0	0	0	0	0	0	11	304	535	719	831
107	Hu_01_L1b	53	20211014	171.326	-5167.82	1648.85	1.88461	100.285	13.6095	0.542155	1	0.435752	NA	6.82597	53.7612	424.108	0.434589	6.80775	22.5033	9.15388	2	0.0565557	3.00092	4158	0.0910233	4.82981	33.3956	6.65664	0	0	0	0	0	13	32	57	72	103	381	684	987	1259
108	Hu_01_L1b	54	20211014	10277.4	-6008.23	1473.12	0.684613	100.942	7.53661	0.498431	1	0.208579	NA	2.79786	18.924	7.06403	0.19067	2.55763	105.09	879.555	1	0.052994	7.74073	1449	0.0271528	3.96615	31.645	6.51839	1	9	33	49	73	88	106	121	135	148	237	278	280	280
109	Hu_01_L1b	55	20211014	9277.12	537.384	1076.29	0.566305	100.865	5.86788	0.564117	1	0.148958	NA	2.58519	67.5555	452.383	0.144598	2.50953	20.7829	5.83776	1	0.0310776	5.48779	1431	0.0204542	3.61186	29.2543	5.03893	0	0	0	0	0	0	0	4	10	15	126	252	417	550
110	Hu_01_L1b	56	20211014	8403.97	-576.931	1851.51	1.61278	101.349	13.7095	0.485116	2	0.0257025	0.0257403	1.2466	28.5186	13.4886	0.0237592	1.25671	36.7896	15.7361	2	0.116757	7.23953	2672	0.0579245	3.5916	33.3938	6.3992	0	0	1	3	4	9	12	16	21	25	88	143	221	299
111	Hu_01_L1b	57	20211014	6427.73	3631.93	2868.14	1.46927	99.9205	11.9463	0.523183	1	0.0904503	NA	3.55837	366.248	703.478	0.070978	2.79232	432.926	924.149	1	0.150486	10.2422	1718	0.0343293	2.33648	32.3435	6.56678	0	0	0	0	0	0	0	0	0	0	0	0	16	87
112	Hu_01_L1b	58	20211014	8682.61	748.161	1881.13	1.05123	99.4572	7.5116	0.665604	1	0.188681	NA	4.03816	22.4823	6.89238	0.176957	3.78725	20.3747	4.9997	1	0.0964707	9.17695	1579	0.0473334	4.50268	37.1914	7.12101	0	1	8	15	22	29	39	44	51	63	125	181	229	290
113	Hu_01_L1b	59	20211014	11449.9	3805.68	1230.77	0.631982	100.469	6.24773	0.570031	1	0.261311	NA	4.7401	20.1343	7.16324	0.244603	4.43703	21.3468	7.26253	1	0.0526365	8.32879	896	0.0201172	3.1832	33.8392	6.3136	0	4	14	30	43	55	67	82	94	113	225	297	358	417
114	Hu_01_L1b	60	20211014	11749.4	4050.09	1379.62	0.423879	101.643	4.97509	0.548501	1	0.0507227	NA	0.835149	347.62	1590.95	0.0441831	0.727474	18.2155	8.12791	1	0.00911292	2.14989	1727	0.0239587	5.65226	28.8908	5.20159	0	0	0	0	0	0	0	0	0	0	0	0	11	46
115	Hu_01_L1b	61	20211014	6355.1	6646.09	947.627	0.918435	100.819	7.98365	0.572333	1	0.253228	NA	4.44624	21.1352	6.60284	0.287258	5.04376	23.1224	10.7632	1	0.0764233	8.32103	2711	0.061104	6.65306	34.0132	5.98026	0	3	17	33	48	60	80	97	111	133	345	560	845	1182
116	Hu_01_L1b	62	20211014	7283.19	6337.13	1575.03	0.451496	100.475	6.38066	0.446054	1	0.150974	NA	2.14285	22.4341	6.31229	0.153659	2.18097	15.1035	5.83871	0	NA	NA	996	0.0174942	3.87473	30.9778	6.34461	0	0	6	17	26	34	43	53	64	70	116	129	135	149
117	Hu_01_L1b	63	20211014	7292.36	4906.47	949.54	0.72519	100.823	7.90064	0.494071	1	0.258972	NA	3.32527	18.0455	6.00058	0.24368	3.12892	92.5308	687.719	1	0.0759381	10.4715	559	0.014178	1.95508	35.3208	6.38063	0	7	14	26	39	53	62	78	85	93	170	209	228	239
118	Hu_01_L1b	64	20211018	9929.89	7394.49	1270.16	1.97332	100.726	14.2804	0.532774	1	0.221794	NA	8.3076	146.37	1028.42	0.250146	9.36956	20.702	8.99444	1	0.17449	8.84245	4377	0.113576	5.75557	35.467	6.77146	0	0	0	0	0	0	0	0	0	0	90	348	613	941
119	Hu_01_L1b	65	20211018	7273.57	7690.4	1229.56	1.43154	102.365	14.9689	0.410357	1	0.239699	NA	4.7866	157.024	951.836	0.266361	5.31902	86.3023	730.998	1	0.0690633	4.82441	2241	0.0397366	2.7758	31.2923	5.80112	0	0	0	0	0	0	0	0	0	0	91	273	430	532
120	Hu_01_L1b	66	20211018	6376.63	8321.99	742.659	0.211656	98.1882	3.01774	0.569144	1	0.0922226	NA	1.95852	19.6738	6.39448	0.107256	2.27777	13.8013	7.78227	0	NA	NA	534	0.0101935	4.81609	31.8876	6.40504	0	0	12	19	26	33	40	43	48	55	99	147	200	239
121	Hu_01_L1b	67	20211018	-3315.44	3051.05	1069.07	0.259847	99.5752	3.53994	0.556288	1	0	NA	1.28503	18.7803	10.9346	0	1.44689	19.4705	7.43676	1	0.031237	12.0213	470	0.00591275	2.27547	27.8557	5.32165	0	1	6	7	11	15	20	25	29	33	57	104	161	179
122	Hu_01_L1b	69	20211018	-1935.69	3743.83	1160.71	1.16011	101.113	8.6368	0.618202	1	0.0744685	NA	4.34365	30.3932	8.12694	0.0706039	4.11823	16.6441	9.12929	1	0.0554282	4.77784	1859	0.0401122	3.45762	33.4162	6.17393	0	0	2	12	24	39	53	63	73	85	193	283	382	432
123	Hu_01_L1b	70	20211018	-1047.11	869.187	1662.5	0.737972	Inf	11.7716	0.335487	1	0.558408	NA	6.16153	171.484	894.299	0.613365	6.76794	19.4418	7.20332	2	0.0365519	4.95302	2213	0.0331757	4.49552	29.5777	5.51208	0	0	0	0	0	0	0	0	0	0	76	375	663	980
124	Hu_01_L1b	71	20211018	-791.866	1567.21	1750.47	0.829222	101.199	7.41307	0.575793	1	0.327581	NA	4.48213	21.2917	6.06245	0.331906	4.54132	67.2294	485.337	1	0.0752301	9.07237	2418	0.0346086	4.17362	29.0935	5.52652	0	0	6	13	32	44	57	72	84	108	256	367	418	445
125	Hu_01_L1b	72	20211018	-1498.48	779.218	1471.54	0.930747	101.395	9.07119	0.508207	1	0.0667762	NA	2.1662	156.136	943.049	0.0597507	1.9383	18.5341	7.50993	1	0.0802192	8.6188	2593	0.0474695	5.10015	31.4892	6.22904	0	0	0	0	0	0	0	0	0	0	40	121	209	262
126	Hu_01_L1b	73	20211018	-4017.11	-3103.86	2509.34	0.384147	101.607	4.75204	0.537777	1	0.325119	NA	4.9914	58.4843	496.493	0.322918	4.9576	18.6309	5.95772	0	NA	NA	1135	0.0213152	5.54869	31.8001	6.17887	0	0	0	0	0	4	17	37	56	77	280	432	560	670
127	Hu_01_L1b	74	20211018	-737.928	133.797	1630.16	0.45136	100.115	4.66347	0.610178	1	0.0691632	NA	1.04148	19.2893	7.98631	0.0498673	0.750919	184.895	865.178	0	NA	NA	1440	0.0240809	5.33518	30.7341	5.58683	0	0	2	6	8	9	16	19	23	29	86	131	145	149
128	Hu_01_L1b	76	20211018	-3670.51	-5519.52	1494.88	0.903623	101.471	8.46454	0.533997	1	0.113959	NA	5.11508	285.951	1563.27	0.106479	4.77937	19.618	10.6726	1	0.0819609	9.07025	2490	0.0541837	5.99628	33.5497	6.10661	0	0	0	0	0	0	0	0	0	0	0	19	178	354
129	Hu_01_L1b	78	20211018	-815.533	-8694.63	1528.53	1.50746	101.604	16.7224	0.380202	1	0.372035	NA	6.20055	298.738	1683.55	0.462931	7.71548	177.329	1302.71	1	0.163945	10.8756	2995	0.0589794	3.91251	32.3244	6.20739	0	0	0	0	0	0	0	0	0	0	0	6	229	368
130	Hu_01_L1b	79	20211018	6892.55	-5202.98	1692.51	1.01158	98.1483	9.11045	0.534906	1	0.0570699	NA	2.14265	23.8608	10.5409	0.060384	2.26707	242.627	1019.28	1	0.143447	14.1805	2247	0.0488765	4.8317	33.309	6.68774	0	0	5	15	24	32	38	43	56	72	131	174	233	295
131	Hu_01_L1b	80	20211018	5547.78	-5427.52	1058.74	1.41293	101.158	12.4505	0.489078	1	0.390843	NA	9.45587	23.5232	9.27231	0.39814	9.6324	47.8688	360.945	1	0.143972	10.1896	5001	0.0859967	6.08642	30.8078	6.17244	0	1	30	85	124	161	204	258	310	362	863	1337	1724	2038
132	Hu_01_L1b	81	20211018	7883.4	-6785.18	1911.59	0.59687	98.8911	6.10651	0.561407	1	0.0475503	NA	1.64548	32.3284	11.3782	0.0675637	2.33805	21.8588	11.3226	1	0.0460067	7.70799	1632	0.0181855	3.04681	26.6261	5.41131	0	0	1	4	15	16	26	34	44	49	128	197	271	332
133	Hu_01_L1b	82	20211018	-6710.74	5380.29	3293.88	0.635972	99.756	6.79112	0.526625	1	0.13367	NA	2.80148	23.5525	7.64629	0.124078	2.60043	17.1107	8.53171	1	0.0898815	14.1329	1791	0.0268215	4.2174	28.8981	7.07373	0	6	18	35	46	61	77	87	103	119	276	384	474	562
134	Hu_02_L1a	1	20201007	8792	-388.402	1153.09	0.0904453	93.9979	2.42758	0.401391	1	0.0802088	NA	1.32592	14.8145	3.7945	0.113364	1.87399	29.8809	7.24341	0	NA	NA	430	0.00311883	3.4483	22.2221	6.34364	0	7	18	28	38	56	64	75	86	98	217	240	240	240
135	Hu_02_L1a	2	20201007	-1444.31	4499.48	861.584	0.115683	99.7287	2.06691	0.555489	1	0.0147746	NA	1.07476	19.4802	10.8948	0.017898	1.30197	25.6112	10.4714	0	NA	NA	829	0.00437124	3.77864	19.715	6.03617	0	2	6	11	21	29	38	45	49	54	119	164	185	190
136	Hu_02_L1a	3	20201007	-2192.43	1031.91	1162.96	0.156952	96.7003	2.6129	0.538526	1	0.106965	NA	1.75441	16.7346	3.79225	0.101456	1.66406	24.2166	8.26826	0	NA	NA	912	0.00767445	4.88966	23.384	6.67115	1	2	11	19	35	49	63	77	95	114	299	427	481	491
137	Hu_02_L1a	9	20200519	-5241.68	-4437.08	661.731	0.24104	99.1069	4.40375	0.425325	1	0.126138	NA	1.73366	14.6578	8.45293	0.175346	2.40998	29.0979	10.7133	0	NA	NA	910	0.0165196	6.85349	31.0919	7.07186	0	8	14	16	20	26	38	52	67	83	155	208	265	332
138	Hu_02_L1a	10	20200519	-412.361	-7578.75	708.298	0.526947	95.7244	7.12206	0.442986	1	0.0535088	NA	2.09133	16.1165	5.44472	0.0710395	2.7765	21.5085	7.91448	2	0.0422408	8.01614	1744	0.039387	7.47457	33.6679	6.99548	2	6	19	29	34	43	55	71	81	95	233	396	538	632
139	Hu_02_L1a	11	20200519	-1333.06	-7738.79	221.889	0.0554675	89.8082	1.93684	0.363148	1	0.136943	NA	1.08525	7.40118	2.06059	0.234417	1.8577	21.5505	8.53368	0	NA	NA	541	0.00563777	10.1641	25.7243	6.07305	6	16	26	44	56	69	83	99	118	126	273	364	430	458
140	Hu_02_L1a	12	20200519	2137.54	-5897.81	1044.4	0.243348	98.9388	4.54837	0.414426	2	0.0926657	0.00026303	1.14383	67.7199	531.068	0.109302	1.34761	16.5314	5.20674	1	0.019617	8.06127	1249	0.0168324	6.91699	28.0662	6.58287	0	0	0	0	0	0	13	32	53	66	281	474	583	647
141	Hu_02_L1a	13	20200519	681.158	-4715.89	871.214	0.151915	99.8899	2.33883	0.588691	1	0.0383275	NA	0.529363	9.70141	1.91892	0.0364649	0.503638	15.2374	3.98305	1	0.0103075	6.78503	624	0.00959721	6.31747	28.7406	8.00682	0	1	2	3	4	7	8	13	14	17	42	50	51	51
142	Hu_02_L1a	14	20200519	235.114	-2020.83	507.958	0.167553	95.2524	2.65949	0.552655	1	0.122244	NA	1.45866	7.29511	1.66658	0.133615	1.59434	13.7402	6.57939	0	NA	NA	934	0.0193629	11.5563	32.9517	6.32006	1	5	9	20	24	32	49	59	75	85	233	355	440	472
143	Hu_02_L1a	15	20200519	3826.88	-1639.9	1033.78	0.317487	98.9895	5.02946	0.447487	2	0.0522388	0.0104651	0.990957	11.5572	5.77993	0.0641384	1.18354	22.5575	8.31517	1	0.0169758	5.34693	1803	0.025864	8.14646	28.2369	7.54659	3	16	28	38	47	59	74	88	106	110	228	327	413	481
144	Hu_02_L1a	16	20200519	-2016.92	-2204.97	793.599	0.436345	99.388	6.78779	0.409867	1	0.100376	NA	1.7086	17.0409	4.81145	0.0660229	1.12385	20.1075	6.99174	1	0.0769721	17.6402	1376	0.023356	5.35264	30.2976	7.12718	0	1	6	11	19	25	36	46	48	56	107	125	133	143
145	Hu_02_L1a	17	20200519	1304.48	-4719.86	1116.58	0.285943	99.3072	3.45364	0.607752	1	0.112711	NA	2.49202	19.8571	7.73694	0.116449	2.57466	63.3384	342.074	0	NA	NA	1682	0.0239771	8.38528	28.5794	6.74717	0	0	32	47	70	96	113	136	158	172	383	625	867	1061
146	Hu_02_L1a	18	20200519	2022.7	-4849.86	644.386	0.26055	97.7228	4.4923	0.439147	1	0.167532	NA	2.56688	12.9604	4.74237	0.168342	2.5793	29.0668	6.79553	1	0.0340274	13.0598	981	0.0135002	5.18143	28.0593	7.00344	1	2	15	25	33	47	60	80	101	120	275	423	528	594
147	Hu_02_L1a	20	20200519	1542.45	-120.96	479.242	0.367563	95.7226	5.48783	0.452173	1	0.123436	NA	1.58876	14.8432	5.97453	0.230634	2.96851	50.5479	257.333	1	0.0450487	12.256	1428	0.0269816	7.34069	31.9367	6.00823	1	12	17	28	45	54	64	81	104	117	303	453	565	588
148	Hu_02_L1a	21	20200519	-1657.7	-2765.57	656.8	0.170117	99.9157	3.00659	0.493827	1	0.0845086	NA	1.44299	9.41008	1.92975	0.0946986	1.61698	10.6729	3.18777	0	NA	NA	1170	0.0150856	8.86782	27.8433	6.04794	1	4	9	17	20	30	35	43	52	59	137	166	167	167
149	Hu_02_L1a	22	20200519	-1314.11	-3260.43	696.948	0.182537	99.0513	4.05176	0.384067	1	0.0745015	NA	1.11432	9.48422	3.00528	0.0666424	0.99677	17.0871	4.75217	1	0.0187156	10.253	820	0.00995822	5.45545	26.696	7.16173	2	4	7	10	12	13	17	23	25	30	57	59	59	59
150	Hu_02_L1a	23	20200519	-2847.38	-3195.13	874.511	0.293606	98.6046	3.82435	0.558604	1	0.161752	NA	2.52618	21.5583	71.692	0.250811	3.91707	40.838	102.378	0	NA	NA	1711	0.0290219	9.88461	29.964	7.73857	0	1	23	34	43	53	75	95	110	120	298	496	627	738
151	Hu_02_L1a	24	20200519	78.6927	-2882.1	754.83	0.296947	99.8702	3.91192	0.550233	2	0.100368	0.0758834	1.8024	20.6544	6.75116	0.158062	2.86393	22.7694	8.72139	1	0.0110614	3.72504	1774	0.0242139	8.15429	28.1188	6.73019	0	0	11	19	30	44	56	78	88	117	339	566	796	978
152	Hu_02_L1a	25	20200519	-1477.55	-3301.83	1205.13	0.0588204	97.3489	1.12861	0.648073	1	0.0314138	NA	0.563604	14.9861	2.98057	0.0402869	0.722799	18.106	7.40157	0	NA	NA	286	0.00467064	7.94051	30.6817	5.03587	0	3	5	7	8	10	12	16	16	18	29	32	32	32
153	Hu_02_L1a	26	20200519	2830.6	-876.904	564.5	0.0550779	96.5803	1.04853	0.667658	1	0.021064	NA	0.571184	15.2307	5.99739	0.0195966	0.531394	18.375	8.2143	0	NA	NA	375	0.00687535	12.483	31.2247	6.98036	0	4	10	15	19	27	32	36	41	47	101	136	166	181
154	Hu_02_L1a	27	20200519	-7433.08	-1134.24	643.295	0.202036	97.57	3.13181	0.531669	1	0.134794	NA	2.0814	149.013	1050.32	0.15807	2.44081	17.644	8.55501	1	0.00172594	0.854273	1289	0.0174884	8.65609	28.1227	6.56246	0	0	0	0	0	0	0	0	0	0	71	197	272	287
155	Hu_02_L1a	28	20200519	-8647.6	-2376.99	814.147	0.124254	97.259	1.71244	0.703195	1	0.0195881	NA	0.485482	19.2107	5.48464	0.0196951	0.488133	25.4518	8.53053	0	NA	NA	709	0.0107414	8.64473	29.3732	6.36492	0	0	0	3	3	7	8	13	15	20	31	31	31	31
156	Hu_02_L1a	29	20200519	-9832.23	-2679.86	406.027	0.167867	95.5245	2.5577	0.575366	1	0.0589917	NA	1.06998	13.4751	7.0404	0.0563739	1.0225	15.6825	6.8622	0	NA	NA	703	0.00789679	4.7042	26.4506	6.05879	0	4	12	18	22	29	33	38	44	57	134	195	243	259
157	Hu_02_L1a	30	20200519	-5132.01	458.159	369.025	0.126116	98.1892	2.00868	0.605462	1	0.0711808	NA	0.963407	8.05479	3.04914	0.0980447	1.327	24.1155	6.88521	0	NA	NA	758	0.00982156	7.78774	27.6211	6.59078	1	7	11	14	19	23	32	35	44	57	162	283	374	433
158	Hu_02_L1a	31	20200519	-5114.67	503.178	906.164	0.491561	99.7192	8.15149	0.369515	1	0.218557	NA	3.42243	10.3145	4.34356	0.388802	6.08832	23.2991	7.58068	2	0.0523013	10.6398	2595	0.034422	7.00258	27.8647	6.60077	7	21	37	51	74	93	111	133	154	180	337	437	535	608
159	Hu_02_L1a	33	20200519	-3543.21	-200.059	1266.39	0.448643	98.9921	6.29552	0.45018	1	0.175874	NA	2.99534	13.0735	5.38403	0.254201	4.32933	93.7105	532.441	1	0.0620813	13.8376	2848	0.0387121	8.62872	27.7892	7.29146	4	16	39	63	82	108	135	163	189	224	652	1192	1688	2033
160	Hu_02_L1a	34	20200519	-3144.92	-9567.22	826.254	0.290329	99.2022	4.3915	0.482834	1	0.165471	NA	2.62499	106.233	881.32	0.200824	3.18583	26.0604	9.5265	1	0.010016	3.44989	1994	0.0251743	8.67096	27.2315	6.86786	0	0	0	0	0	0	0	0	0	1	209	395	542	643
161	Hu_02_L1a	37	20200519	-4876.64	-2511.63	810.489	0.12179	99.2305	2.11283	0.562375	1	0.0536624	NA	0.967935	9.43509	4.53432	0.0863759	1.55801	13.6595	8.31632	0	NA	NA	620	0.0116908	9.59918	31.725	6.51635	6	15	22	29	37	42	54	70	76	82	191	281	306	308
162	Hu_02_L1a	39	20211007	6860.75	-4695.79	587.117	0.293965	98.6824	4.12612	0.518171	1	0.135519	NA	1.96415	15.334	5.67849	0.140393	2.03478	17.7835	7.84144	1	0.019437	6.612	1055	0.0201679	6.86064	31.8267	6.65688	0	0	0	2	3	5	8	8	14	21	52	77	85	85
163	Hu_02_L1a	40	20200519	4502.65	-2388.06	1270	0.0424997	97.149	1.00159	0.588009	1	0.0529479	NA	0.834927	9.34708	4.5527	0.0517968	0.816776	211.974	1193.34	0	NA	NA	212	0.00409406	9.63314	32.1256	6.14284	2	11	14	18	24	29	32	36	41	42	57	58	58	58
164	Hu_02_L1a	41	20200519	5024.33	-762.529	1157.29	0.134724	99.5029	2.23404	0.568883	1	0.0620587	NA	1.18015	13.0315	3.92242	0.0727502	1.38347	18.8105	8.80802	1	0.0348132	25.8404	339	0.0056817	4.21729	30.6292	6.01561	0	14	20	23	33	40	47	56	62	69	144	203	221	221
165	Hu_02_L1a	43	20211007	-854.234	5100.64	829.377	0.397053	99.4551	6.25224	0.417844	1	0.111806	NA	3.61593	215.478	1459.57	0.109844	3.55249	25.0995	7.93845	1	0.053376	13.4431	1385	0.0203886	5.13499	28.9109	6.71407	0	0	0	0	0	0	0	0	0	0	0	184	420	617
166	Hu_02_L1a	44	20200519	-501.103	-3247.88	521.338	0.249329	98.1241	4.56266	0.41987	1	0.106861	NA	1.40411	14.5051	4.40773	0.140858	1.8508	22.4916	6.09836	1	0.0546841	21.9325	1114	0.0182557	7.32192	29.751	7.37976	0	4	15	21	28	33	43	51	60	64	127	168	211	249
167	Hu_02_L1a	49	20200519	596.323	4905.85	1085.02	0.261176	100.478	3.63347	0.543815	1	0.11305	NA	1.74884	14.7716	5.01635	0.131846	2.0396	26.5503	10.4599	0	NA	NA	918	0.0116788	4.47161	27.4348	6.59415	0	6	16	23	36	42	55	65	74	82	172	274	377	480
168	Hu_02_L1a	50	20200519	1171.84	-3262.65	1035.31	0.137106	99.0159	2.38561	0.539001	1	0.069653	NA	1.09493	13.4906	7.71663	0.101703	1.59875	27.4139	12.0349	1	0.0137925	10.0597	410	0.00596344	4.34952	28.624	7.0127	0	8	16	21	28	34	43	46	49	54	80	93	95	95
169	Hu_02_L1a	51	20211007	1612.95	-2425.79	693.38	0.0241657	86.6875	0.635248	0.636316	1	0.0261391	NA	0.51579	8.7285	3.50214	0.0276252	0.545114	25.3177	7.84098	0	NA	NA	201	0.00164527	6.80831	23.6284	5.80263	1	6	9	14	19	27	35	45	53	56	113	141	141	141
170	Hu_02_L1a	52	20211007	-4696.98	-2306.15	509.983	0.12152	97.648	2.47064	0.480219	1	0.0383916	NA	0.469516	15.0092	4.49884	0.0416971	0.509942	44.4161	19.1214	0	NA	NA	534	0.00812637	6.68727	29.5084	6.14127	0	1	1	1	2	4	5	6	7	8	20	50	78	94
171	Hu_02_L1a	54	20211007	1801.15	-2430.62	859.623	0.121337	97.9462	2.1947	0.540055	1	0.0274302	NA	0.294046	16.0031	3.95333	0.0306369	0.328421	21.4872	5.07407	0	NA	NA	497	0.00415065	3.42077	23.6751	6.07108	0	0	3	4	6	8	9	11	11	15	30	50	62	66
172	Hu_02_L1a	56	20200519	4380.28	-2909.71	870.816	0.239528	100.782	3.35497	0.555947	1	0.0980423	NA	1.57907	15.7052	5.58086	0.0834874	1.34465	30.0399	5.54739	1	0.0224747	9.38291	683	0.00675446	2.81991	25.0861	6.34602	0	0	1	1	1	7	7	11	22	24	101	158	167	173
173	Hu_02_L1a	58	20200519	3133.93	-4470.07	1007.38	0.0654059	97.7791	1.72435	0.45527	1	0.0675121	NA	0.898606	126.064	666.986	0.0954277	1.27017	23.7059	7.11633	0	NA	NA	371	0.00270168	4.13063	22.3832	6.19944	0	0	0	0	0	0	0	0	0	0	49	101	144	178
174	Hu_02_L1a	60	20200519	-3085.6	2985.99	820.883	0.467899	99.3059	6.8553	0.425167	1	0.182736	NA	3.19101	16.2484	4.4552	0.271857	4.74729	86.5207	573.968	0	NA	NA	1441	0.0160803	3.4367	26.0586	6.71456	2	7	19	36	46	64	92	98	116	145	328	477	656	780
175	Hu_02_L1a	61	20200519	-4009.17	2273.99	1108.5	0.205035	99.1474	5.64899	0.297668	1	0.0462828	NA	1.04979	14.3459	8.12969	0.0407791	0.924956	24.9482	6.48695	0	NA	NA	778	0.00983116	4.79486	27.5302	6.20637	0	8	11	19	23	29	35	42	49	53	102	118	125	125
176	Hu_02_L1a	62	20211007	-3352.2	1561.83	931.51	0.326026	100.344	5.33952	0.429026	1	0.15028	NA	2.33479	98.7513	652.678	0.127009	1.97323	31.4963	9.01099	1	0.0225586	6.91926	1627	0.0156504	4.80035	24.6389	6.71496	0	0	0	0	0	0	0	0	0	3	178	336	495	580
177	Hu_02_L1a	63	20200519	-3940.54	2258.93	661.455	0.282896	100.291	4.81257	0.433037	1	0.160119	NA	2.0212	144.359	963.83	0.15606	1.96996	22.2948	6.78797	1	0.0446327	15.777	1019	0.0101457	3.58637	25.0809	6.47865	0	0	0	0	0	0	0	0	0	0	114	280	391	486
178	Hu_02_L1a	67	20200519	-4996.73	3328.88	430.537	0.0785097	98.3275	1.29966	0.682241	1	0.092043	NA	1.6024	14.4373	6.08962	0.114193	1.988	19.2139	4.6273	0	NA	NA	378	0.00399857	5.09309	25.5518	6.7387	3	6	10	15	21	32	41	55	63	69	154	218	226	226
179	Hu_02_L1a	68	20211007	-5828.61	4191.9	356.122	0.242226	98.5323	3.67406	0.511468	1	0.0621474	NA	1.08464	19.1344	5.35329	0.0634319	1.10706	18.0488	5.81655	0	NA	NA	1192	0.0152991	6.31606	27.6653	6.29549	0	1	7	13	18	30	41	45	54	59	131	226	261	261
180	Hu_02_L1a	69	20210510	-6031.9	3785.36	804.325	0.409944	99.1166	5.98734	0.445725	1	0.0448028	NA	1.03182	21.8068	10.4036	0.0543443	1.25156	18.5372	5.86493	0	NA	NA	1631	0.0172793	4.21505	25.6568	6.53999	0	0	7	16	24	30	46	61	70	81	192	327	408	463
181	Hu_02_L1a	70	20200519	-4715.79	4508.74	633.513	0.0824152	94.5223	1.8259	0.501586	1	0.0303674	NA	0.791775	480.395	1916.34	0.0317871	0.82879	21.3251	5.64696	0	NA	NA	416	0.00345849	4.19642	23.7028	5.88497	0	0	0	0	0	0	0	0	0	0	0	0	0	8
182	Hu_02_L1a	71	20211006	-4560.18	4433.29	961.216	0.276579	98.5951	4.08454	0.502598	1	0.0401389	NA	2.41522	21.1081	6.54663	0.0658236	3.9607	34.9516	10.1308	1	0.00360539	1.30356	1197	0.0156448	5.65652	27.6972	6.652	0	1	13	29	54	82	96	116	149	172	403	541	667	738
183	Hu_02_L1a	72	20211006	-732.626	4448.63	795.703	0.148783	99.8065	3.32568	0.408293	1	0.159537	NA	2.86872	109.81	745.875	0.133891	2.40758	21.7933	5.30833	0	NA	NA	737	0.00751458	5.0507	25.1649	6.70287	0	0	0	0	0	0	0	0	0	0	123	340	434	491
184	Hu_02_L1a	74	20211006	343.056	2510.66	339.831	0.0802204	98.2603	1.63583	0.549881	1	0.0667462	NA	0.799805	147.244	833.962	0.085293	1.02205	42.7344	12.2639	0	NA	NA	364	0.00324298	4.04259	24.3383	5.971	0	0	0	0	0	0	0	0	0	0	25	75	113	157
185	Hu_02_L1a	76	20211006	-1603.3	2586.65	1031.06	0.0694389	96.4509	1.59382	0.512601	1	0.0372934	NA	0.482944	491.204	1666.02	0.0354735	0.459377	21.6728	8.09814	0	NA	NA	482	0.00303002	4.36358	21.6994	5.10915	0	0	0	0	0	0	0	0	0	0	0	0	0	0
186	Hu_02_L1a	77	20211006	-85.6232	1532.77	884.912	0.207156	99.211	3.49923	0.48385	1	0.0372088	NA	1.03351	22.9844	7.52282	0.0306655	0.851759	23.0673	6.36098	1	0.0225113	10.8668	646	0.0052694	2.54369	23.3939	6.22337	0	0	1	4	7	14	18	26	33	40	100	145	165	169
187	Hu_02_L1a	78	20211006	1037.18	4705.19	1038.5	0.391097	100.559	7.23186	0.357622	1	0.0731425	NA	1.51837	17.0035	5.35632	0.0797734	1.65602	20.4061	6.77031	1	0.0147328	3.76705	2611	0.0198192	5.06759	22.8398	6.07735	0	1	14	30	43	63	74	92	103	117	198	269	350	426
188	Hu_02_L1a	79	20201006	467.651	3318.9	514.169	0.439138	98.6652	4.43604	0.629829	1	0.114786	NA	2.07199	17.1225	7.77656	0.0938668	1.69438	23.1278	7.95531	1	0.0373605	8.50771	2044	0.0293896	6.69256	28.7599	6.49697	1	2	5	14	22	30	37	46	52	58	150	256	338	429
189	Hu_02_L1a	80	20201006	-1687.94	5552.17	583.564	0.29816	100.488	5.766	0.374319	1	0.172112	NA	1.59704	14.7911	5.17032	0.16127	1.49644	18.4933	7.62969	1	0.0591066	19.8238	613	0.00677759	2.27314	25.7874	7.0141	0	3	12	20	31	39	46	55	67	76	149	185	199	227
190	Hu_02_L1a	81	20201006	-2121.47	5895.56	1134.9	0.333315	98.7673	5.06451	0.459039	1	0.217937	NA	2.34887	14.3189	4.06913	0.243731	2.62688	120.834	832.424	1	0.0488596	14.6587	367	0.00493169	1.47959	27.7498	7.04349	0	1	9	22	29	34	41	46	48	53	80	92	100	115
191	Hu_02_L1a	82	20201006	-1848.19	7051.83	352.671	0.235646	98.4325	3.05476	0.603968	1	0.0798481	NA	1.50325	17.3564	5.51603	0.0651573	1.22667	16.0528	5.13164	1	0.0481025	20.413	761	0.00635199	2.69557	23.8998	5.58863	0	1	6	8	17	23	30	40	45	54	158	254	351	422
192	Hu_02_L1a	83	20201006	2547.01	577.616	1202.96	0.187579	95.5664	3.21839	0.492381	1	0.124487	NA	1.71722	115.853	783.095	0.159002	2.19334	22.6374	6.31943	1	0.0184378	9.82936	627	0.00665522	3.54796	25.9327	5.97285	0	0	0	0	0	0	0	0	0	0	109	200	255	307
193	Hu_02_L1a	85	20201006	2683.51	293.707	773.981	0.0849901	99.008	1.88196	0.496728	1	0.0247121	NA	0.311763	11.3308	3.4329	0.0310625	0.391879	23.8264	3.80783	0	NA	NA	515	0.00451984	5.31808	23.8515	6.60417	1	2	3	5	6	8	9	11	13	13	30	48	63	77
194	Hu_02_L1a	86	20201006	2018.71	3999.22	1209.56	0.140702	94.6446	3.33134	0.392704	1	0.0321011	NA	1.025	18.7308	5.27108	0.036928	1.17913	30.0806	10.2947	1	0.00724822	5.15147	555	0.00603214	4.28718	25.6957	6.91611	0	0	4	6	8	11	15	26	30	37	84	117	131	158
195	Hu_02_L1a	87	20201007	3073.82	3523.74	888.845	0.270807	99.45	4.45311	0.454563	1	0.138755	NA	3.01125	13.5007	4.88641	0.194538	4.22184	127.401	934.381	1	0.030583	11.2933	894	0.0121962	4.50366	27.5074	7.85408	6	18	30	54	79	114	133	153	195	211	350	456	502	502
196	Hu_02_L1a	88	20201007	3131.85	2468.12	666.273	0.168497	96.3121	2.36753	0.623139	1	0.107587	NA	2.37962	18.7158	4.5526	0.111251	2.46066	23.0182	5.40437	1	0.0205793	12.2135	374	0.00426675	2.53224	26.161	6.9117	0	1	1	4	5	10	14	20	27	30	74	125	152	154
197	Hu_02_L1a	90	20201007	1978.9	4707.84	531.232	0.326992	98.5145	5.26571	0.435898	1	0.152605	NA	1.98623	138.634	948.647	0.157396	2.0486	29.6215	7.81522	1	0.0643396	19.6762	1193	0.0124665	3.81248	25.6696	6.23791	0	0	0	0	0	0	0	0	0	0	59	128	157	180
198	Hu_02_L1a	91	20201007	2708.76	4291.51	1137.44	0.240959	100.049	4.53227	0.413172	1	0.0768902	NA	1.16108	17.5001	4.93151	0.0978168	1.47709	24.712	9.21914	0	NA	NA	1333	0.0152983	6.34891	26.2033	6.93331	0	0	2	9	14	18	28	37	42	50	133	194	245	283
199	Hu_02_L1a	92	20201007	5355.95	3577.93	855.218	0.260571	98.5025	3.60985	0.546528	1	0.0538045	NA	1.28777	12.8119	6.10786	0.0317098	0.758947	23.2166	7.23579	1	0.00286165	1.09822	1509	0.0134913	5.1776	24.4999	5.61159	0	6	11	18	24	32	40	49	56	61	123	174	217	284
200	Hu_02_L1a	93	20201007	6208.73	3539.13	425.499	0.346531	101.548	7.30658	0.326536	1	0.14947	NA	1.79213	123.338	792.041	0.144779	1.73588	24.8053	7.23125	1	0.0425267	12.2721	1546	0.010869	3.13651	22.4512	5.55799	0	0	0	0	0	0	0	0	0	0	79	181	267	343
201	Hu_02_L1a	94	20201007	4996.32	1091.79	1202.34	0.134289	99.2811	2.14555	0.59107	1	0.0250258	NA	0.771772	19.9106	5.20694	0.0144999	0.447163	23.9973	9.63264	1	0.0121152	9.02177	573	0.00448391	3.33901	23.1283	6.0037	0	1	1	5	5	14	21	26	29	35	71	106	123	125
202	Hu_02_L1a	95	20201007	5675.86	1439.05	1045.64	0.198262	98.7872	3.41301	0.481771	1	0.0342365	NA	1.0189	15.296	6.89974	0.0429847	1.27925	20.093	5.85428	0	NA	NA	1182	0.00882836	4.45287	22.8802	5.73816	0	1	10	14	25	30	41	47	52	58	112	145	156	162
203	Hu_02_L1a	96	20201007	7074.46	1174.72	478.37	0.100193	99.5216	1.71962	0.606655	1	0.0524134	NA	0.797256	10.9442	4.15067	0.0456411	0.694243	19.7184	6.3971	0	NA	NA	719	0.00526472	5.25458	22.5901	5.94735	0	4	10	14	20	31	41	51	57	64	103	125	128	128
204	Hu_02_L1a	97	20201007	9685.42	185.123	1238.86	0.110102	73.5442	2.00433	0.554259	1	0.0267616	NA	1.67944	14.7667	5.48744	0.0254495	1.5971	26.9996	6.9896	0	NA	NA	576	0.00677039	6.14918	26.6649	6.56679	0	7	19	25	30	42	49	54	62	74	159	261	329	365
205	Hu_02_L1a	98	20201007	8547	-2382.73	931.891	0.250729	100.429	3.47068	0.554038	2	0.0458238	0.0257916	0.941324	15.3783	4.35011	0.044078	0.904941	20.5819	7.61237	0	NA	NA	1799	0.0167726	6.68952	24.5281	6.37801	1	10	22	35	48	62	80	90	102	122	250	377	469	539
206	Hu_02_L1b	1	20211014	-256.06	7570.73	1133.54	0.658262	101.167	6.40853	0.571029	1	0.0840997	NA	0.917328	11.225	6.51788	0.0863643	0.94203	12.7472	7.44357	1	0.0712588	10.8253	12873	0.0132325	2.01022	11.0652	4.00889	0	21	53	80	101	135	172	220	268	314	743	1043	1105	1105
207	Hu_02_L1b	2	20211014	-4726.99	3288.06	1802.96	1.81883	101.637	17.1443	0.420299	2	0.390776	0.360309	3.80832	29.9746	230.498	0.361233	3.51153	30.4714	11.9223	1	0.215003	11.821	7897	0.0691629	3.80261	21.8674	9.18976	0	1	19	124	207	300	397	511	596	714	1438	2130	2893	3621
208	Hu_02_L1b	3	20211014	-5757.81	5333.19	1916.79	0.368164	100.728	4.9106	0.505875	1	0.55861	NA	7.57712	7.59216	3.86046	0.537805	7.29491	26.8835	7.78448	1	0.0485889	13.1976	6247	0.012015	3.26349	14.2324	4.22131	31	162	306	462	639	817	985	1164	1333	1479	3011	4170	4763	5186
209	Hu_02_L1b	4	20201127	-6589.2	4952.77	1771.75	0.613636	102.07	8.55374	0.408259	1	0.508759	NA	5.7767	115.049	903.454	0.458535	5.20642	24.9928	7.09949	1	0.0599599	9.77125	4899	0.0146093	2.38077	16.2568	5.18702	0	0	0	0	0	0	0	0	0	0	741	1709	2638	3266
210	Hu_02_L1b	5	20211014	-3176.18	4931.28	2231.21	0.534671	100.95	7.42135	0.429265	1	0.281781	NA	3.22969	13.3689	5.0532	0.299794	3.43615	103.968	534.291	0	NA	NA	8030	0.0155292	2.90445	13.2744	5.47818	0	16	65	99	146	190	220	266	308	353	688	968	1218	1478
211	Hu_02_L1b	6	20211014	-6113.05	5747.73	1376.59	0.405718	101.199	5.31443	0.498705	1	0.0514442	NA	0.605823	9.38422	5.12767	0.0858313	1.01078	33.6342	10.5919	1	0.105146	25.916	3493	0.00575056	1.41738	13.6631	3.66967	0	9	22	35	54	69	86	102	112	122	157	177	228	327
212	Hu_02_L1b	7	20211014	-2562.35	7798.57	1249.36	0.343627	97.935	4.31043	0.550413	1	0.046248	NA	0.639432	11.0586	2.69357	0.0540889	0.747842	27.9855	10.3602	1	0.0167446	4.87289	2850	0.00738931	2.15038	15.7646	4.48739	0	2	6	8	13	16	19	22	25	32	120	179	203	231
213	Hu_02_L1b	8	20211014	-581.971	5145.22	916.932	0.460437	100.802	4.64814	0.620371	1	0.181378	NA	1.7478	5.8201	1.66344	0.16092	1.55066	22.3234	6.26176	1	0.0371335	8.06485	7944	0.0182637	3.9666	14.8941	4.80604	45	133	209	292	370	451	549	625	714	786	1506	1945	2178	2247
214	Hu_02_L1b	9	20211014	-4829.57	5356.01	1195.89	0.124863	96.284	1.59277	0.758494	1	0.0596965	NA	0.713617	93.6998	408.141	0.0827265	0.98892	18.1868	8.53161	0	NA	NA	3902	0.00457803	3.66645	12.1579	3.29184	0	0	0	0	0	0	0	0	0	16	336	768	1136	1287
215	Hu_02_L1b	10	20211014	-3441.28	3533.92	954.634	0.28799	99.6552	3.15062	0.66938	1	0.1031	NA	2.85538	20.3811	12.0324	0.122191	3.3841	94.321	488.787	0	NA	NA	3690	0.00826649	2.87041	13.4066	5.74965	0	9	64	140	212	304	388	472	552	640	1536	2523	3177	3472
216	Hu_02_L1b	12	20211015	-8471.8	8646.61	1587.79	0.597771	102.951	9.24796	0.371075	1	0.283717	NA	3.33156	12.1174	5.49184	0.333932	3.92121	13.3959	5.70043	1	0.0757707	12.6756	5386	0.00876568	1.4664	12.6866	5.02866	0	100	212	340	459	587	711	838	954	1064	1894	2344	2550	2690
217	Hu_02_L1b	13	20211015	291.845	7293.35	1757.83	0.275647	99.5028	3.51911	0.58204	1	0.186392	NA	2.99814	48.4828	402.525	0.182698	2.93872	11.9222	5.43983	0	NA	NA	18728	0.00658005	2.38713	8.14655	2.25233	0	0	0	0	11	158	311	438	607	756	2341	3823	5430	6992
218	Hu_02_L1b	14	20211015	647.693	3849.97	1773.84	0.573621	102.038	9.00949	0.370567	1	0.361227	NA	4.76463	13.6237	5.45686	0.396362	5.22807	13.5613	5.74773	1	0.0356957	6.22288	14708	0.0119131	2.07683	10.5061	3.3567	0	136	301	458	640	811	1001	1187	1390	1580	3364	4466	4968	5209
219	Hu_02_L1b	15	20211015	-98.5897	3817.97	1885.92	0.583451	101.535	9.09553	0.371243	1	0.125607	NA	1.56775	43.6483	332.037	0.12503	1.56055	9.37485	5.34359	1	0.0628636	10.7745	5032	0.007004	1.20044	11.7605	4.97005	0	0	0	0	40	113	193	273	353	448	1104	1375	1469	1471
220	Hu_02_L1b	16	20211015	-1211.93	6741.74	1800.88	0.668224	102.526	9.40873	0.392857	1	0.140583	NA	1.55124	18.8814	7.47926	0.143093	1.57894	90.9538	548.04	1	0.0851377	12.7409	5661	0.0102623	1.53575	13.8147	4.25357	0	0	14	22	34	44	48	62	73	83	195	277	349	427
221	Hu_02_L1b	18	20211015	607.288	5631.04	1733.22	0.404564	100.765	5.03371	0.525517	2	0.202362	0.234518	2.50219	14.3622	5.46355	0.194658	2.42707	18.3734	8.81357	1	0.0144529	3.57248	23060	0.00979148	2.42026	8.5811	2.5563	0	83	261	434	631	835	1045	1254	1475	1683	4004	6444	8569	9992
222	Hu_02_L1b	19	20211015	-2381.91	5997.26	2555.57	0.784895	100.695	7.27682	0.56548	1	0.278546	NA	7.10497	20.2717	6.58535	0.295031	7.52546	21.1691	7.20191	1	0.0244504	3.11512	23851	0.0224679	2.86254	11.1486	3.40121	0	13	117	243	388	552	731	902	1066	1231	2876	4253	5644	7344
223	Hu_02_L1b	29	20211016	-1468.81	456.651	2825.2	0.362088	100.744	5.01635	0.489748	1	0.243975	NA	3.3296	18.693	5.65988	0.211737	2.88964	17.0503	5.29926	1	0.0483978	13.3663	2655	0.0177857	4.91198	22.3642	4.81712	0	19	67	113	168	225	281	326	378	436	810	1035	1167	1235
224	Hu_02_L1b	30	20211016	5180.73	5227.88	2250.68	0.806961	100.952	9.19441	0.455892	1	0.0682629	NA	1.73607	154.078	888.758	0.0667097	1.69657	19.7497	8.87394	2	0.0613324	7.60041	4170	0.0655467	8.12267	29.7326	6.40726	0	0	0	0	0	0	0	0	0	0	74	253	453	609
225	Hu_02_L1b	31	20211016	747.931	3667.46	2813.48	0.836003	100.787	9.56603	0.448632	1	0.0325587	NA	0.986263	12.2837	6.05496	0.0306387	0.928103	13.4932	5.72637	1	0.211183	25.261	4209	0.0313099	3.74519	22.6886	5.98627	1	4	15	23	26	32	40	46	56	59	129	188	249	361
226	Hu_02_L1b	32	20211016	-7490.31	686.959	3726.32	0.526443	100.134	4.76274	0.662005	1	0.169396	NA	2.57131	6.47618	3.51673	0.139541	2.11813	28.2571	5.77513	2	0.0959398	18.2242	2677	0.0158115	3.00346	20.7177	5.88174	29	96	155	217	288	345	421	480	562	624	1190	1505	1596	1600
227	Hu_02_L1b	33	20211016	-9209.38	807.259	2732.98	0.174207	98.1384	3.36696	0.448013	1	0.170433	NA	1.58896	12.0915	3.46569	0.164271	1.53151	20.6379	6.25566	0	NA	NA	2018	0.0168945	9.69793	24.2504	4.83449	1	11	30	44	75	94	118	144	175	204	495	755	914	1034
228	Hu_02_L1b	34	20211016	-7343.69	139.122	2389.12	0.601635	99.3526	5.91952	0.582219	1	0.633351	NA	7.53766	74.8101	687.731	0.555362	6.6095	98.3556	713.875	1	0.0695013	11.5521	2327	0.0404751	6.72752	30.8919	6.24752	0	0	0	0	0	0	2	51	123	165	640	972	1145	1263
229	Hu_02_L1b	36	20211016	-8714.89	5230.87	2060.85	0.146188	97.4972	1.859	0.721902	1	0.206664	NA	2.4233	9.74481	5.37048	0.199211	2.33591	17.3056	4.18581	0	NA	NA	2796	0.0117243	8.02005	18.2872	5.70094	7	38	65	99	131	163	193	232	263	296	659	982	1211	1265
230	Hu_02_L1b	37	20211016	-6072.26	4473.13	1738.92	0.397981	99.7285	5.14447	0.50861	1	0.183797	NA	2.84152	146.996	764.907	0.336291	5.19912	31.3958	8.35951	1	0.0392287	9.85692	3093	0.0211435	5.31269	22.3512	5.18639	0	0	0	0	0	0	0	0	0	0	158	755	1449	2095
231	Hu_02_L1b	38	20211016	-5815.71	4655.69	1738.54	0.398844	99.9447	4.79356	0.546631	1	0.178261	NA	2.84153	146.996	764.907	0.326163	5.19912	31.3959	8.35955	1	0.0365105	9.15409	3093	0.0211436	5.30122	22.3512	5.18639	0	0	0	0	0	0	0	0	0	0	158	755	1449	2095
232	Hu_02_L1b	39	20211016	4432.54	3554.5	1854.01	0.413928	98.146	5.43412	0.494279	1	0	NA	1.31722	307.45	1015.09	NA	1.46791	292.315	930.551	1	0.0299017	7.22388	1299	0.0226173	5.46407	30.8391	6.40862	0	0	0	0	0	0	0	0	0	0	0	0	37	54
233	Hu_02_L1b	40	20211016	-2133.81	7431.23	1622.4	0.147132	100.091	2.61865	0.514689	1	0.215151	NA	3.22729	10.3191	6.89646	0.216865	3.25299	30.4771	7.40744	1	0.0119749	8.13887	1256	0.00826483	5.61728	22.0371	5.17968	0	28	76	124	171	218	265	309	352	399	720	874	916	972
234	Hu_02_L1b	41	20211016	-1437.84	6023.61	1057.34	0.379515	99.8207	4.93552	0.513614	1	0.191552	NA	2.59458	15.1071	6.4047	0.222973	3.02018	25.6924	6.81971	1	0.0378321	9.96854	1059	0.0185221	4.88046	29.7772	8.75563	0	10	19	27	33	42	46	57	63	75	136	177	217	249
235	Hu_02_L1b	42	20211016	-3020.51	4170.37	1169.52	0.419847	98.5243	6.3228	0.428847	1	0.144029	NA	1.66055	14.6832	5.39498	0.151537	1.74712	26.8427	7.79945	0	NA	NA	2966	0.040845	9.72855	28.0888	6.75306	3	8	21	40	44	50	60	69	79	90	130	155	259	433
236	Hu_02_L1b	43	20211016	-5053.28	5941.32	1841.53	0.295028	100.393	4.58024	0.467919	1	0.199914	NA	2.3093	55.0717	440.355	0.157586	1.82035	25.7564	10.7262	1	0.0128412	4.35253	4243	0.0230918	7.82698	20.6378	5.01301	0	0	0	0	1	37	82	127	164	215	578	766	844	855
237	Hu_02_L1b	44	20211016	-3907.66	4042.33	1085.53	0.0914601	96.2257	1.51806	0.646671	1	0.21307	NA	2.64063	67.4681	435.456	0.192743	2.38872	31.3068	9.48618	0	NA	NA	2609	0.00872475	9.53941	17.5008	4.30155	0	0	0	0	0	0	27	83	135	183	746	1362	1831	1972
238	Hu_02_L1b	45	20211016	3981.28	-2030.53	1323.59	0.379668	98.8143	4.85101	0.522703	1	0.239945	NA	4.5121	17.3395	7.95645	0.244135	4.5909	27.6329	11.5678	1	0.0886766	23.3563	1154	0.0157172	4.13973	28.3075	6.1032	0	13	32	48	77	103	123	144	169	185	369	484	578	684
239	Hu_02_L1b	46	20211016	-1222.17	3754.22	594.662	0.316278	Inf	5.10002	0.440175	1	0.305663	NA	2.95621	11.0644	4.26175	0.240474	2.32573	24.3456	6.93328	1	0.0267836	8.46839	2181	0.0190933	6.03688	24.637	4.83216	9	32	66	100	136	173	199	243	283	317	574	745	834	891
240	Hu_02_L1b	47	20211016	-3545.46	675.456	1464.76	1.0108	100.74	10.4158	0.467628	1	0.0156626	NA	1.09671	279.838	896.427	0.0171387	1.20007	24.7688	4.68625	1	0.0707545	6.99986	5509	0.0599335	5.92932	25.9432	6.42018	0	0	0	0	0	0	0	0	0	0	0	0	22	70
241	Hu_02_L1b	48	20211016	1916.05	-1524.19	901.812	0.366133	99.5211	4.82133	0.513345	1	0.219181	NA	3.04618	9.21671	5.18595	0.195053	2.71085	28.5125	10.9712	1	0.0285473	7.79698	3326	0.0247842	6.76918	23.1175	5.08821	9	45	81	116	159	204	227	267	304	335	606	817	922	954
242	Hu_02_L1b	49	20211016	2177.97	-26.099	718.35	0.361186	100.69	4.76598	0.514619	1	0.374634	NA	3.49847	52.2469	405.467	0.323786	3.02364	30.0424	6.9265	1	0.0416972	11.5445	3115	0.0228381	6.32309	22.3786	6.34463	0	0	0	0	4	31	67	95	122	148	486	798	1107	1403
243	Hu_02_L1b	50	20211016	2643.68	-174.985	847.883	0.303205	96.2632	4.03739	0.540598	1	0.0471804	NA	0.791561	14.6549	4.07316	0.0638305	1.0709	23.6996	8.85641	1	0.0308651	10.1796	1168	0.0146681	4.83769	27.8641	5.2438	0	5	10	20	28	36	40	56	65	74	162	204	236	246
244	Hu_02_L1b	51	20211016	4521.07	4297.15	1353.81	0.297185	97.3619	4.01267	0.536704	1	0.198502	NA	2.14379	11.5209	4.74744	0.288937	3.12047	27.3062	7.16456	1	0.0313416	10.5462	2638	0.0176321	5.93303	22.4939	4.49424	0	19	28	41	52	65	79	94	106	123	334	634	897	1078
245	Hu_02_L1b	53	20211016	-6405.03	3646.22	2771.69	0.216719	100.532	4.17129	0.418291	1	0.267346	NA	2.81355	10.4113	4.25441	0.240219	2.52807	32.2585	10.5413	0	NA	NA	3466	0.0125492	5.79055	17.5156	5.31327	2	44	77	105	144	172	206	239	257	291	563	851	1174	1532
246	Hu_02_L1b	54	20211016	-2831.23	3437.99	2897.94	0.30914	99.9534	4.11755	0.536969	1	0.169938	NA	1.84871	9.71744	4.19706	0.127712	1.38935	38.3815	16.9268	2	0.0452233	14.6287	1423	0.00951914	3.07923	21.0497	7.18051	3	54	88	117	156	196	239	270	302	340	580	716	797	831
247	Hu_02_L1b	55	20211016	-105.888	2212.31	2231.82	0.232846	100.304	3.23515	0.565764	1	0.129232	NA	1.47254	13.4073	5.03928	0.118617	1.35159	22.9163	5.91485	0	NA	NA	3898	0.0161162	6.92138	18.8481	4.55339	1	27	54	77	108	145	178	204	236	268	601	908	1130	1228
248	Hu_02_L1b	56	20211016	1267.35	7614.79	1469.78	0.143996	96.2835	1.96519	0.676049	1	0.245256	NA	2.61951	8.87582	3.30529	0.218149	2.32998	22.2208	11.0486	0	NA	NA	3799	0.0084872	5.89406	15.4385	3.4907	14	93	157	235	291	354	412	470	530	589	1220	1775	2263	2635
249	Hu_02_L1b	58	20211016	727.448	7568.82	1992.2	0.577125	101.167	8.31859	0.402978	2	0.15328	0.00071842	1.4647	14.2233	6.00952	0.179825	1.60392	19.8941	11.2847	0	NA	NA	8670	0.0355932	6.16732	18.7916	4.52164	0	40	94	141	193	248	304	356	398	456	1062	1674	2272	2917
250	Hu_02_L1b	61	20211015	-3583.72	2389.4	2287.55	1.26789	101.691	13.1329	0.431365	1	0.452053	NA	9.53951	22.1629	10.2878	0.534137	11.2717	37.9095	13.4219	1	0.0704253	5.55452	7387	0.0653707	5.15586	24.2445	5.90138	0	1	10	45	75	118	161	219	280	326	853	1389	1940	2604
251	Hu_03_L1a	1	20211008	7307.11	-2808.89	4668.02	0.243163	100.17	3.51359	0.536207	1	0.206594	NA	2.2581	34.7598	236.105	0.198079	2.16503	14.9792	8.35421	0	NA	NA	1451	0.0049471	2.03448	17.4538	4.67864	0	0	0	9	31	53	85	101	120	137	299	450	562	661
252	Hu_03_L1a	3	20211008	7620.86	-2044.67	5018.96	0.580438	101.007	8.83754	0.380764	1	0.230001	NA	2.92423	11.0938	5.08937	0.222208	2.82516	24.0015	6.81748	1	0.0530585	9.14112	1787	0.00842065	1.45074	19.604	4.87699	0	25	49	69	84	101	117	138	160	181	288	391	517	596
253	Hu_03_L1a	4	20211008	5502.95	-725.777	5001.47	0.555093	100.952	5.34918	0.610624	1	0.21823	NA	4.73904	36.7245	170.943	0.199221	4.32623	27.0187	8.37025	1	0.0732952	13.2041	3018	0.0181966	3.27812	20.9587	5.90122	0	0	0	4	26	52	80	119	165	196	582	926	1139	1254
254	Hu_03_L1a	5	20211008	6210.99	48.1114	4659.61	0.785703	100.466	6.58321	0.625488	1	0.135662	NA	2.15143	7.76317	2.58165	0.137313	2.17762	12.0003	4.30242	1	0.0925209	11.7756	5586	0.0244861	3.11646	18.9154	5.18174	9	42	66	98	123	145	163	184	214	233	454	665	858	1005
255	Hu_03_L1a	6	20211008	4861.83	-1337.24	4430.68	0.733837	100.769	6.69952	0.587273	1	0.377646	NA	4.90391	45.1427	419.643	0.329655	4.28072	19.7732	7.81472	1	0.062798	8.55749	9373	0.0218407	2.97624	15.1619	4.43404	0	0	0	2	51	121	192	266	334	403	1080	1827	2491	3093
256	Hu_03_L1a	7	20211008	3143.76	-852.952	3906.12	1.03757	101.049	9.32378	0.531582	1	0.838045	NA	11.2452	8.49893	4.47003	0.835298	11.2083	23.86	9.37222	1	0.0936847	9.02923	11248	0.0402231	3.87666	17.2949	5.46597	25	162	310	427	544	678	803	924	1055	1193	2271	3243	4251	5229
257	Hu_03_L1a	26	20211008	10238	-1368.64	3597.16	0.711306	100.9	7.04033	0.547346	1	0.511176	NA	7.4307	6.2562	3.221	0.547103	7.95295	22.2264	7.42635	1	0.0779729	10.9619	9058	0.028031	3.94079	16.3614	5.34753	89	228	356	479	603	735	866	988	1107	1234	2395	3281	3964	4602
258	Hu_03_L1a	27	20211008	9034.98	-527.833	4255.96	0.475764	100.1	4.59211	0.6418	1	0.0778701	NA	1.21286	7.79527	2.47084	0.100144	1.55979	17.5588	5.07762	1	0.0564541	11.866	5728	0.0168587	3.5435	16.281	4.97571	7	21	45	71	93	114	140	167	201	232	536	821	1015	1069
259	Hu_03_L1a	28	20211008	4246.57	2064.15	4359.52	0.480042	101.288	6.28395	0.471814	1	0.372345	NA	4.69014	7.11751	2.65673	0.381012	4.7993	20.072	5.92012	1	0.0589132	12.2725	6642	0.0194352	4.04865	14.9816	6.37147	55	158	257	353	449	545	638	739	840	932	1673	2361	2932	3453
260	Hu_03_L1a	29	20211008	6955.05	-432.088	3707.17	0.426333	100.103	4.19282	0.653348	1	0.226823	NA	2.71994	7.66742	3.48989	0.236411	2.83492	19.8803	6.07706	1	0.0509177	11.9432	6720	0.0178257	4.18117	15.6807	4.86405	31	97	158	220	276	339	394	447	504	562	1089	1631	2141	2567
261	Hu_03_L1a	30	20211008	2393.41	-2166.13	4030.69	0.447837	99.4443	5.71933	0.49494	1	0.164038	NA	2.41389	11.1823	5.50962	0.159124	2.34159	21.9905	6.20601	1	0.0524875	11.7202	5044	0.022044	4.92233	18.5509	5.76007	1	22	43	67	93	126	158	187	224	253	562	831	1103	1381
262	Hu_03_L1a	31	20211008	8543.17	-6115.87	4922.66	0.162746	98.1038	2.25144	0.64027	1	0.119759	NA	2.25794	160.534	709.938	0.127651	2.40674	22.611	7.86255	1	0.0174178	10.7024	6142	0.00584214	3.58973	11.0713	3.52026	0	0	0	0	0	0	0	0	0	0	373	1349	2249	3094
263	Hu_03_L1a	32	20211008	10742.4	-9754.26	4762.21	0.366599	100.316	3.93676	0.629225	1	0.195184	NA	2.30797	10.2083	5.07348	0.188411	2.22788	15.0157	3.82108	1	0.0360068	9.82185	4386	0.0118199	3.2242	15.8004	4.92065	0	18	39	59	95	121	145	170	195	216	453	639	747	831
264	Hu_03_L1a	33	20211011	9418.13	-7908.92	5108.29	0.835977	100.351	7.17407	0.598202	1	0.5101	NA	7.1015	12.1294	5.54761	0.568373	7.91275	49.0586	290.585	1	0.0696986	8.33738	9279	0.0240375	2.87538	15.4807	5.02571	2	61	130	207	284	362	448	555	636	735	1565	2435	3266	4034
265	Hu_03_L1a	34	20211011	9252.25	-8347.88	4969.78	0.652504	100.327	5.48801	0.662915	1	0.395449	NA	7.13616	63.2294	571.702	0.345145	6.22839	39.8457	403.99	1	0.0771903	11.8299	12323	0.0265055	4.06212	14.5663	4.64684	0	0	0	0	0	0	0	1	11	63	1240	2465	3686	4954
266	Hu_03_L1a	35	20211011	10000.2	-733.986	4837.47	0.247026	99.3044	2.86617	0.66427	1	0.178043	NA	2.56255	93.8195	702.464	0.220171	3.16889	109.671	592.755	1	0.0368695	14.9253	2810	0.00571514	2.31358	13.9591	4.94128	0	0	0	0	0	0	0	0	0	31	556	993	1447	1743
267	Hu_03_L1a	37	20211011	8380.77	836.261	5037.87	0.0982827	97.571	1.37362	0.749781	1	0.257542	NA	3.9272	5.76593	2.43043	0.29256	4.46118	19.2834	7.95322	0	NA	NA	3864	0.00345581	3.5162	10.9678	3.35752	58	180	287	388	497	590	708	800	907	1014	1886	2627	3084	3237
268	Hu_03_L1a	38	20211011	8310.97	763.877	4750.26	0.226033	99.7791	2.85216	0.629155	1	0.117051	NA	1.80022	163.096	1006.75	0.161663	2.48635	22.2235	7.887	1	0.0191649	8.4788	6168	0.00776144	3.43376	12.3692	3.6366	0	0	0	0	0	0	0	0	0	0	205	805	1469	2137
269	Hu_03_L1a	40	20211011	3975.68	396.47	4711.49	0.425634	100.652	4.32087	0.633291	1	0.207222	NA	2.4509	63.1715	553.768	0.218485	2.58412	140.165	746.941	1	0.042526	9.99122	11360	0.0137875	3.23928	12.0535	3.85333	0	0	0	0	0	0	58	124	204	286	1193	2118	2674	2931
270	Hu_03_L1a	41	20211011	3993.76	-8920.13	4610.16	0.134816	98.8272	1.84229	0.690166	1	0.100833	NA	1.76569	14.7016	6.28417	0.109386	1.91548	134.832	732.516	1	0.00598182	4.43703	1482	0.00715968	5.31071	19.6746	5.06018	0	6	22	47	77	104	128	152	187	222	580	852	937	939
271	Hu_03_L1a	42	20211011	1865.98	-7473.37	3941.54	0.236755	99.6582	2.80335	0.660196	1	0.198479	NA	2.86863	9.68737	4.70535	0.177195	2.56101	21.5965	7.49404	1	0.0192873	8.14654	5337	0.0106605	4.50277	14.4095	4.20674	9	77	149	217	278	344	413	473	549	615	1132	1534	1690	1757
272	Hu_03_L1a	43	20211011	338.762	-3924.52	4086.51	0.336591	99.6111	4.46451	0.524138	1	0.26712	NA	2.50389	11.4505	4.89603	0.267213	2.50476	24.8623	6.05803	1	0.0359067	10.6677	4482	0.0130858	3.88775	16.5205	4.49379	1	29	71	122	165	211	252	290	334	374	778	1097	1371	1577
273	Hu_03_L1a	44	20211011	7929.19	-7544.74	5076.6	0.320703	98.8093	4.04669	0.559911	1	0.156108	NA	1.6257	12.1126	4.60422	0.178811	1.86212	22.8022	6.3165	1	0.0299814	9.34865	3664	0.00823991	2.56933	15.001	4.40836	0	14	37	55	73	88	109	132	156	182	393	592	690	782
274	Hu_03_L1a	45	20211011	-68.1666	-6498.58	4430.69	0.473285	100.033	6.88349	0.426668	2	0.233337	0.0479078	3.07999	27.7193	178.452	0.289147	3.80256	28.9127	10.2775	1	0.0607749	12.8411	1366	0.00846517	1.7886	21.4601	5.43543	0	0	4	22	44	63	97	124	146	171	383	488	590	662
275	Hu_03_L1a	47	20211011	7010.68	-5701.88	4833.02	0.372018	99.2598	4.09326	0.611116	1	0.240771	NA	3.26945	13.4239	3.14561	0.207034	2.81133	21.8699	5.90788	1	0.0691168	18.5789	3384	0.00936791	2.51813	16.314	4.30837	0	14	51	88	126	156	205	238	263	302	667	866	993	1065
276	Hu_03_L1a	48	20211011	9953.16	-4890.88	4940.22	0.294412	100.892	3.82029	0.56022	1	0.144644	NA	1.97538	9.34114	4.12456	0.143683	1.96225	31.7403	10.9776	0	NA	NA	5401	0.0123052	4.17957	14.9488	4.59954	7	41	76	108	150	182	235	280	315	359	781	1102	1393	1584
277	Hu_03_L1a	49	20211011	8287.62	-6525.44	4076.88	0.153251	96.0557	2.71472	0.510147	1	0.14813	NA	1.4339	14.2301	4.17996	0.187962	1.81947	18.0151	4.35912	0	NA	NA	2388	0.007357	4.80062	16.7155	4.71575	0	11	39	53	70	83	102	124	153	171	358	502	586	636
278	Hu_03_L1a	50	20211011	7450.94	-10805	3416.92	0.395266	99.449	4.50477	0.578191	1	0.267671	NA	6.29468	16.6676	8.2097	NA	NA	NA	NA	1	0.0259024	6.55316	6665	0.0167267	4.23176	15.7675	4.15743	0	9	52	87	120	161	206	240	271	317	800	1272	1697	1954
279	Hu_03_L1a	52	20211012	4576.56	-6568.9	3657.92	0.546789	101.031	6.05855	0.533739	1	0.241562	NA	3.66873	7.88357	3.14356	0.243439	3.69724	18.4629	7.00712	1	0.0402063	7.35317	9311	0.0215209	3.93586	15.0816	4.4911	17	153	260	346	445	551	661	770	891	1007	2089	2739	2863	2878
280	Hu_03_L1a	53	20211012	2144	-6105.92	4386.6	0.173871	97.1228	2.30495	0.653593	1	0.103076	NA	1.66061	10.8794	3.0289	0.11649	1.87672	16.6477	5.00938	1	0.015536	8.93535	1980	0.00558173	3.21027	16.4809	4.17372	0	15	40	57	85	107	124	148	169	206	440	552	601	623
281	Hu_03_L1a	54	20211012	2360.65	-7804.95	3219.94	0.215307	100.637	2.90476	0.598061	1	0.266292	NA	3.96803	8.93029	3.15605	0.260176	3.87689	19.5734	8.15572	0	NA	NA	4249	0.0100061	4.64739	15.1272	4.55715	7	80	142	183	248	307	361	404	461	511	1051	1563	1757	1822
282	Hu_03_L1a	55	20211012	4027.45	-5685.21	3731.6	0.268549	97.5323	3.35456	0.600064	1	0.115567	NA	1.7236	13.7427	3.93914	0.109649	1.63533	21.5933	8.13222	0	NA	NA	2486	0.0149796	5.57796	20.9008	6.00032	2	6	16	23	36	46	66	79	93	103	249	410	584	750
283	Hu_03_L1a	56	20211012	2172.23	-2666.58	4147.77	0.121633	98.2573	1.98343	0.598551	1	0.195966	NA	2.36503	7.55797	4.22953	0.246877	2.97946	33.3425	10.767	0	NA	NA	1490	0.00615331	5.05893	18.4566	5.22452	16	46	78	119	147	182	214	247	276	302	527	694	809	896
284	Hu_03_L1a	57	20211012	3716.2	-2843.98	3866.48	0.219034	99.0327	2.97119	0.591417	1	0.083067	NA	1.15868	12.7034	5.27512	0.0932384	1.30055	29.4638	8.63691	0	NA	NA	2060	0.0106631	4.86823	19.7524	5.90544	0	7	12	22	29	41	55	65	73	80	177	282	403	495
285	Hu_03_L1a	58	20211012	1144.86	-3463.36	4114.45	0.126873	98.5448	1.81628	0.672278	1	0.176502	NA	2.19909	8.07622	4.15044	0.19072	2.37623	19.3738	6.06769	0	NA	NA	2497	0.00654678	5.1601	15.9851	4.22355	17	59	103	151	187	238	275	317	358	407	813	1080	1223	1320
286	Hu_03_L1a	59	20211012	690.787	-2141.47	3776.85	0.349171	100.628	4.19892	0.571091	1	0.128329	NA	1.64661	8.92138	4.21494	0.14342	1.84025	24.8545	5.94018	0	NA	NA	5969	0.031323	8.97069	20.144	5.31629	9	39	68	102	132	174	212	241	281	323	793	1142	1292	1359
287	Hu_03_L1a	60	20211012	-536.152	-3568.04	4917.1	0.330848	100.174	3.40765	0.678863	1	0.251289	NA	3.42397	11.5868	3.43797	0.235366	3.20701	27.4649	8.48325	1	0.0436386	13.1899	5075	0.0119987	3.62664	15.3104	4.31021	4	62	132	183	227	274	330	385	438	504	1090	1719	2256	2559
288	Hu_03_L1a	61	20211012	-1038.53	-2657.93	4712.09	0.439732	99.8952	4.31916	0.647455	1	0.39441	NA	3.71464	12.406	3.38147	0.370568	3.49008	143.54	917.814	1	0.0751372	17.087	5177	0.0243329	5.53357	19.6505	4.82473	0	36	77	125	172	208	246	290	339	384	872	1255	1515	1779
289	Hu_03_L1a	62	20211012	508.455	-1158.83	4962.31	0.325364	99.6489	4.75823	0.480786	1	0.539125	NA	8.48554	14.1719	5.11473	0.52458	8.25661	28.0481	8.82576	1	0.00897261	2.75771	3172	0.0148826	4.57415	19.44	5.08223	1	52	164	255	334	409	475	550	632	704	1195	1484	1633	1731
290	Hu_03_L1a	63	20211012	9609.83	88.1286	4759.86	0.190398	99.8816	2.82172	0.56721	1	0.167164	NA	2.40228	11.798	3.90395	0.166504	2.3928	19.7797	8.30626	1	0.0197902	10.3941	2988	0.00676948	3.55544	15.2664	3.99478	0	28	70	106	138	187	250	305	365	419	1003	1407	1673	1727
291	Hu_03_L1a	64	20211012	10322.4	820.782	5275.82	0.297011	99.9228	3.2493	0.662536	1	0.285554	NA	4.40885	54.5691	596.403	0.339628	5.24373	20.0774	6.18163	0	NA	NA	6060	0.0138708	4.67013	15.3096	4.04747	0	0	0	0	0	47	133	224	310	389	1180	1640	1925	2095
292	Hu_03_L1a	65	20211012	6699.91	1859.35	4792.93	0.364731	99.9087	3.87388	0.637264	1	0.234596	NA	3.14965	14.1007	4.75835	0.244699	3.28529	22.2925	6.8645	0	NA	NA	3019	0.0188239	5.16105	21.2164	5.93197	0	16	42	62	78	93	113	131	148	171	323	490	698	966
293	Hu_03_L1a	66	20211012	14476.7	142.515	4078.96	0.812441	101.113	8.82851	0.476933	2	0.134814	0.0300999	2.68563	16.7101	9.17658	0.132399	2.68567	160.702	1259.85	1	0.153152	18.8509	6113	0.0371276	4.56988	20.8086	6.14756	0	25	83	135	188	237	280	335	384	444	846	1233	1650	2027
294	Hu_03_L1a	67	20211012	3247.02	2259.47	4642.23	0.15755	95.7657	3.1578	0.446729	1	0.131162	NA	2.04091	7.83373	3.22255	0.148046	2.30362	19.6074	5.72767	1	0.0158012	10.0294	2004	0.00778907	4.94387	18.0058	5.26649	21	61	97	120	151	184	221	250	278	317	589	772	876	984
295	Hu_03_L1a	68	20211012	5682.8	3332.94	4896.2	0.114424	92.271	1.62888	0.699747	1	0.103631	NA	1.65467	6.76478	3.61105	0.0991918	1.5838	18.9046	5.59942	0	NA	NA	2531	0.0103432	9.03937	18.3324	5.32494	15	65	101	143	179	222	264	309	360	398	931	1535	1771	1773
296	Hu_03_L1a	69	20211012	7381.85	447.325	4866.56	0.409948	100.251	5.08736	0.524579	1	0.285434	NA	3.7436	6.83359	3.48731	0.341238	4.4755	22.6771	6.83484	1	0.0593842	14.4858	6810	0.0256092	6.24694	18.3694	4.10536	43	127	221	290	385	462	549	630	717	802	1643	2456	3323	4084
297	Hu_03_L1a	70	20211012	731.589	-6298.94	4516.91	0.075622	95.7809	1.4899	0.580441	1	0.0849305	NA	1.0482	103.903	600.71	0.113286	1.39816	32.0033	11.5383	0	NA	NA	2347	0.00646942	8.55494	16.2685	4.2427	0	0	0	0	0	0	0	0	0	3	390	784	1150	1458
298	Hu_03_L1a	73	20211012	6492.28	1713.51	5197.38	0.261037	100.631	3.67222	0.537886	1	0.129004	NA	1.7992	5.23445	1.6948	0.150931	2.10502	15.2041	5.07315	0	NA	NA	7517	0.0210355	8.05841	16.7195	3.59756	44	104	171	226	281	334	382	456	506	563	1014	1265	1391	1481
299	Hu_03_L1a	74	20211012	7230.85	698.347	4893.27	0.496256	100.871	5.45675	0.555504	1	0.091785	NA	1.19041	5.24831	2.21226	0.10247	1.329	16.7186	8.36987	1	0.0312679	6.30075	8720	0.0282657	5.69578	17.1456	4.62053	35	76	122	170	213	259	291	335	382	425	867	1229	1491	1624
300	Hu_03_L1a	75	20211012	6302.93	2124.99	5258.04	0.210072	99.3422	2.79624	0.611161	1	0.1153	NA	1.66084	7.09434	4.33983	0.166454	2.39768	15.7788	3.01639	1	0.0349867	16.6546	3543	0.00877945	4.17926	15.5288	4.51228	18	57	107	147	206	267	319	384	452	512	1214	1587	1664	1705
301	Hu_03_L1a	76	20211012	2207.34	-164.011	4957.45	0.391051	100.152	4.10442	0.630069	1	0.20762	NA	2.48016	9.63233	3.28682	0.244423	2.91978	25.4156	10.2319	1	0.033778	8.63773	3768	0.0259808	6.64383	22.6612	4.66308	14	39	72	101	139	184	229	263	309	357	786	1085	1351	1650
302	Hu_03_L1a	77	20211012	1104.38	402.31	4824.97	0.268552	97.0284	3.53972	0.56868	2	0.19738	0.0609751	2.44013	11.0161	5.09965	0.202624	2.54023	22.1514	6.76268	1	0.0316253	11.7762	1496	0.0152361	5.67342	25.3613	6.17253	4	42	80	104	141	175	212	247	285	317	704	1027	1165	1197
303	Hu_03_L1a	78	20211012	888.746	164.357	4432.87	0.898127	100.812	7.35254	0.612263	1	0.460259	NA	6.06239	14.5344	5.48356	0.47636	6.27447	24.5226	8.0236	1	0.122519	13.6416	6790	0.046104	5.13335	22.5254	4.69677	0	31	77	124	186	251	310	382	433	497	1131	1673	2074	2322
304	Hu_03_L1a	79	20211012	2288.38	1504.13	4154.56	0.182487	98.0611	2.59682	0.599142	1	0.101117	NA	1.42273	7.9632	3.12279	0.136898	1.92617	16.6205	4.86188	1	0.0257493	14.1102	2081	0.0133717	7.32746	21.3958	5.91463	6	40	59	86	107	119	140	159	180	194	392	628	817	910
305	Hu_03_L1a	80	20211012	5303.11	-448.948	3922.92	0.309495	100.34	3.57139	0.619558	1	0.156366	NA	1.68424	6.30775	2.20216	0.218754	2.35623	14.7999	5.32549	1	0.0435831	14.082	3429	0.0182308	5.8905	20.4553	4.8873	30	62	87	119	149	186	214	248	274	302	584	837	1079	1097
306	Hu_04_L1b	1	20210619	8544.64	-815.015	1410.42	0.650794	99.151	6.30114	0.57636	1	0.217793	NA	3.22387	82.3765	447.67	0.211046	3.124	19.8595	7.37061	1	0.0466425	7.16702	7128	0.0662352	10.1776	24.3517	6.62908	0	0	0	0	0	0	0	9	52	77	544	1019	1381	1715
307	Hu_04_L1b	2	20210619	9851.3	208.506	1981.1	0.612496	Inf	7.44116	0.468719	1	0.705392	NA	9.82996	62.2254	495.965	0.753074	10.4944	31.6636	12.4961	1	0.0394683	6.44384	6886	0.0647213	10.5668	25.2305	4.94244	0	0	0	0	0	7	82	204	292	395	1552	2460	3373	4024
308	Hu_04_L1b	3	20210619	9349.94	4418.81	1210.29	0.314941	Inf	3.65357	0.612707	1	0.367597	NA	4.17947	16.9436	8.35361	0.41921	4.76629	39.0124	128.162	0	NA	NA	6811	0.0517245	16.4236	23.4906	4.61383	2	41	120	194	262	338	409	480	558	640	1528	2589	3710	4706
309	Hu_04_L1b	4	20211003	3152.34	-960.823	1146.85	0.664771	101.138	8.13295	0.452916	1	0.257856	NA	4.73434	21.1283	7.36567	0.272287	4.9993	21.74	9.10307	1	0.0347057	5.22071	9335	0.092396	13.8989	25.2939	5.77401	1	35	72	110	160	199	253	301	348	411	1005	1648	2149	2348
310	Hu_04_L1b	5	20211003	7229.19	1633.28	1537.86	0.446528	100.046	4.66478	0.605647	1	0.0479412	NA	0.404976	99.1425	350.079	0.0532023	0.449418	17.1855	3.65726	1	0.0839134	18.7924	3536	0.0462242	10.3519	28.4452	4.72119	0	0	0	0	0	0	0	0	0	1	44	104	147	190
311	Hu_04_L1b	6	20211003	5454.43	-954.087	1178.47	0.266775	100.845	4.24423	0.472188	1	0.413138	NA	6.47023	14.6855	6.55475	0.355044	5.56041	24.7116	9.513	0	NA	NA	3865	0.0348705	13.0711	24.6483	5.3798	0	69	163	226	289	370	444	506	593	653	1133	1484	1716	1898
312	Hu_04_L1b	7	20211003	4394.65	-1063.41	1626.56	0.430901	100.463	4.5049	0.612421	1	0.297625	NA	4.27489	16.7934	5.97323	0.352925	5.06918	27.0402	10.7581	1	0.047812	11.0958	4732	0.0455905	10.5803	25.3896	5.06982	3	45	103	153	188	241	299	343	395	444	913	1306	1724	2244
313	Hu_04_L1b	8	20211003	3738.61	-4931.72	2169.63	0.33158	100.021	3.76572	0.615217	2	0.297552	0.325707	3.78368	48.3188	475.063	0.305554	3.89069	78.5897	523.337	1	0.00458339	1.38229	4356	0.0510588	15.3986	27.2012	5.16678	0	0	0	2	34	145	234	301	357	447	1358	2119	2616	2980
314	Hu_04_L1b	9	20211006	5382.1	-7603.69	2057.84	0.688627	101.288	9.21288	0.409334	1	0.066603	NA	1.65771	21.504	6.29317	0.811416	20.1957	67.7389	603.286	1	0.0494382	7.17925	3506	0.0925832	13.4446	35.4995	7.1513	0	3	12	18	25	29	37	42	49	53	102	120	137	153
315	Hu_04_L1b	10	20211006	7064.95	1288.97	1291.97	0.0796847	94.0766	1.24394	0.719892	1	0.0840699	NA	1.22641	37.3511	118.247	0.0992049	1.4472	32.4936	13.9241	0	NA	NA	1507	0.0113889	14.2925	23.279	4.99843	0	0	2	21	35	52	66	88	111	130	381	564	575	575
316	Hu_04_L1b	11	20211006	4859.78	-1622.79	831.35	0.278965	101.245	3.75542	0.549784	1	0.254662	NA	3.04513	17.3598	7.14452	0.284449	3.4013	26.118	10.3132	1	0.0437737	15.6915	2304	0.0292523	10.486	28.1967	4.58862	2	24	48	86	111	136	172	201	238	264	600	947	1309	1516
317	Hu_04_L1b	12	20211006	7191.93	-306.24	315.825	0.14292	95.3153	2.55591	0.51721	1	0.443922	NA	6.62394	45.2009	298.473	0.46193	6.89263	26.5499	10.7287	0	NA	NA	1500	0.0197033	13.7863	28.0879	5.70468	0	0	0	0	23	106	171	220	293	354	913	1221	1377	1464
318	Hu_04_L1b	13	20211007	-2335.22	2162.26	541.437	0.383589	100.109	4.83021	0.528561	1	0.0196648	NA	0.688121	17.5257	5.14873	0.021722	0.760109	22.6616	7.74383	1	0.0305066	7.95294	3135	0.058205	15.1738	31.724	6.01981	0	2	11	18	28	36	42	49	57	66	144	198	239	285
319	Hu_04_L1b	14	20211007	-191.735	1411.85	1434.68	0.77111	101.757	8.24458	0.493242	2	0.560813	0.417807	6.45479	17.6306	7.6054	0.585291	6.73295	26.684	8.98296	1	0.0861672	11.1744	6598	0.106419	13.8007	29.9072	6.65994	0	32	148	288	390	505	619	757	890	1018	2196	3212	4031	4707
320	Hu_04_L1b	15	20211008	712.353	639.49	2192.71	0.982659	101.547	13.3549	0.357915	1	1.46505	NA	17.9985	19.1492	7.59471	1.29878	15.9557	30.4512	10.9876	1	0.0910312	9.26377	6681	0.133907	13.627	32.3002	6.83166	5	38	169	278	370	458	566	669	774	869	1806	2481	3014	3345
321	Hu_04_L1b	16	20211008	-2891.01	-704.313	1092.83	0.426133	99.7733	6.33907	0.432005	1	0.279287	NA	3.59771	14.0628	4.47992	0.277887	3.57968	137.981	1027.07	1	0.0213156	5.00211	4463	0.0607458	14.2551	27.5482	7.55506	4	32	78	127	166	221	258	312	361	415	926	1364	1792	2174
322	Hu_04_L1b	17	20211008	-1342.89	-942.138	1718.06	0.486119	101.234	5.92285	0.504795	1	0.395986	NA	6.27631	24.5894	10.13	0.308255	4.88579	66.328	510.936	1	0.0115312	2.37209	5008	0.0586943	12.0741	26.7773	6.13915	0	1	45	105	157	201	237	302	353	414	1105	1651	1949	2086
323	Hu_04_L1b	18	20211009	2399.73	-195.738	1286.9	0.246876	96.8872	3.59792	0.528954	1	0.40718	NA	6.05363	22.5971	5.94621	0.418036	6.21504	19.3705	8.22246	0	NA	NA	4297	0.0348176	14.1033	23.2642	5.83888	0	5	109	215	289	390	485	585	662	749	1585	2295	2877	3273
324	Hu_04_L1b	19	20211009	-2951.9	-84.0171	891.383	0.480619	101.017	5.11966	0.579575	1	0.14312	NA	2.4077	24.5393	6.81259	0.139573	2.34803	19.6036	7.44595	1	0.0517853	10.7747	3333	0.054067	11.2495	29.2808	7.96984	0	0	6	34	59	75	93	114	124	148	335	521	737	957
325	Hu_04_L1b	20	20211009	202.542	2327.49	827.595	0.31362	99.2708	3.61329	0.617805	1	0.137064	NA	2.35573	45.1922	195.475	0.111568	1.91752	16.9079	10.5791	1	0.0478092	15.2443	3351	0.023932	7.63087	22.5313	5.56092	0	0	0	0	20	45	84	106	131	160	402	572	699	731
326	Hu_04_L1b	21	20211009	1096.37	2616	661.37	0.314904	99.6586	3.78963	0.590662	1	0.1867	NA	3.96971	24.1733	9.83715	0.191912	4.08054	23.7026	12.2745	1	0.025739	8.17362	2662	0.0327335	10.3948	27.256	6.06857	0	4	36	67	89	126	155	184	213	240	554	793	975	1071
327	Hu_04_L1b	22	20211009	-1247.14	429.369	699.699	0.323541	101.247	3.8445	0.59283	1	0	NA	0.877413	27.1526	5.39114	0	0.939732	22.0195	10.2966	1	0.0353246	10.9181	2462	0.0368968	11.4041	29.6723	5.25893	0	1	6	14	27	32	41	46	55	65	140	183	214	232
328	Hu_04_L1b	23	20211009	2221.32	-1375.17	1543.78	0.683204	100.947	6.39319	0.586769	1	0.353533	NA	6.22121	24.4258	7.82174	0.305522	5.37636	19.1993	8.64055	0	NA	NA	6654	0.109592	16.0409	30.2856	6.27407	0	13	55	98	141	185	226	264	303	348	797	1285	1757	2156
329	Hu_04_L1b	24	20211009	-195.097	-1718.75	2131.02	0.605072	101.416	6.98624	0.495198	1	0.509461	NA	11.3069	74.0921	498.202	0.407166	9.0366	48.497	367.864	1	0.0322958	5.33752	4734	0.0793706	13.1175	30.8545	5.28181	0	0	0	0	0	0	19	116	259	337	1444	2602	3458	4083
330	Hu_04_L1b	26	20211009	2357.97	2513.79	2079.7	1.30449	101.427	13.5786	0.425196	2	0.513756	0.464531	11.8226	26.6461	10.0638	0.512154	11.7849	40.7094	333.589	1	0.119082	9.12857	11303	0.194158	14.8838	30.6698	6.45361	0	5	109	357	580	766	933	1123	1316	1534	3578	5427	6934	7843
331	Hu_04_L1b	27	20211009	11691.1	827.04	3236.2	1.37378	100.304	11.9373	0.500637	1	0.160433	NA	10.1912	35.5104	12.0173	0.168513	10.7045	27.6576	10.7333	1	0.171664	12.4957	6655	0.186985	13.611	36.0894	7.6751	0	0	2	34	115	171	230	279	332	399	1006	1637	2277	2890
332	Hu_04_L1b	31	20211009	-3318.49	-2311.93	1562.75	0.516372	101.77	6.74365	0.461563	2	0.141321	0.116389	2.18359	22.6659	9.37396	0.157114	2.41305	115.219	777.095	0	NA	NA	6181	0.0757948	14.6783	27.4101	5.78333	0	6	48	112	143	186	230	281	331	378	867	1298	1652	1904
333	Hu_04_L1b	32	20211009	2171.84	-5483.09	2280.47	0.247629	99.4209	3.26111	0.584771	1	0.230585	NA	4.81221	20.8959	7.571	0.248504	5.18617	22.2758	10.6265	0	NA	NA	1902	0.0294341	11.8864	29.614	6.27658	1	14	50	85	120	159	190	226	263	299	677	1059	1359	1522
334	Hu_04_L1b	34	20211010	1209.35	-946.132	2096.7	0.49338	100.983	5.57052	0.542054	1	0.130956	NA	2.16842	18.6868	7.15644	0.127148	2.10536	25.7113	9.09029	2	0.0513497	10.4077	3242	0.058427	11.8422	30.8374	7.31482	3	21	41	65	80	112	133	153	175	199	342	428	530	595
335	Hu_04_L1b	35	20211010	6483.02	-5411.36	3114.14	0.402672	100.509	4.38143	0.60187	1	0.0941295	NA	1.28968	19.7117	4.54623	0.0870441	1.1926	18.5853	6.76822	1	0.0335831	8.34005	4341	0.0527141	13.0911	27.271	5.72949	0	0	14	35	49	63	71	78	95	102	206	262	280	280
336	Hu_04_L1b	36	20211010	7346.59	-4154.18	2716.69	0.563508	101.54	6.90767	0.477624	1	0.184664	NA	6.31191	18.5743	9.33972	0.193669	6.61972	73.5442	443.923	1	0.0691065	12.2636	3153	0.0566954	10.0612	29.359	9.6307	0	15	95	162	231	301	360	425	505	567	1351	2078	2387	2474
337	Hu_04_L1b	37	20211010	4029.08	1716.32	567.457	0.350563	100.17	3.94663	0.609212	1	0.128422	NA	2.27017	14.4201	6.40021	0.131529	2.32511	29.7629	9.41012	1	0.0494615	14.1092	4125	0.0323703	9.23379	23.2467	5.77238	0	19	76	116	147	202	245	289	342	386	828	968	1055	1087
338	Hu_04_L1b	38	20211010	4042.54	2736.21	2003.78	0.223368	99.7976	3.12177	0.570291	1	0.123363	NA	2.33398	21.718	6.46587	0.129414	2.44846	15.7015	7.49059	1	0.0329584	14.7552	995	0.0147935	6.62292	29.6547	5.03484	0	6	28	52	73	101	117	139	168	185	354	422	504	554
339	Hu_04_L1b	39	20211010	4439.46	3014.35	1888.34	0.56943	100.911	6.23153	0.53315	1	0.141881	NA	4.38181	30.9002	13.5445	0.116587	3.60063	20.8791	11.1174	1	0.0316338	5.55534	6374	0.06634	11.6502	25.7752	5.789	0	0	10	46	87	114	146	184	207	238	554	867	1136	1348
340	Hu_04_L1b	40	20211010	3203.36	3915.45	1335.33	0.470337	100.512	4.69547	0.62289	2	0.127752	0.11193	1.88573	59.1552	429.911	0.130257	1.9039	18.6726	10.5969	1	0.0173159	3.68159	6034	0.0717214	15.2489	27.1442	5.67983	0	0	0	0	0	12	53	100	130	183	538	769	859	870
341	Hu_04_L1b	42	20211010	2819.2	1531.73	1579.08	0.449676	98.5084	5.36081	0.529485	1	0.257308	NA	4.25771	14.7216	5.55945	0.291202	4.81856	21.1703	5.27933	1	0.0500692	11.1345	5636	0.0586282	13.0379	26.1318	5.01248	1	28	104	160	209	253	293	359	406	455	944	1348	1760	2209
342	Hu_04_L1b	43	20211010	2266.89	-2733.3	2010.99	0.937963	101.868	11.6884	0.396448	1	0.505992	NA	12.5776	48.8096	341.434	0.479025	11.9073	43.11	314.35	1	0.0967438	10.3142	4114	0.11192	11.9323	36.0466	6.81715	0	0	0	0	32	117	231	309	370	451	1029	1413	1674	1818
343	Hu_04_L1b	44	20211010	6453.15	-1465.45	2873.18	0.170219	95.2392	2.22795	0.666679	1	0.0171255	NA	2.24098	31.2009	7.0778	0.0164149	2.14799	12.6818	5.16586	1	0.0152361	8.95089	1246	0.0138892	8.15958	26.2847	6.24062	0	0	0	4	10	19	21	37	50	65	207	401	655	729
344	Hu_04_L1b	46	20211010	9670.03	-4418.07	3351.33	0.920601	100.677	10.0627	0.454795	1	0.145386	NA	7.26709	78.182	530.475	0.156679	7.8316	28.3311	13.9021	1	0.122441	13.3001	5432	0.111423	12.1033	32.3169	7.27264	0	0	0	0	0	0	2	18	64	107	734	1529	2321	2904
345	Hu_04_L1b	47	20211010	9225.19	-3579.1	3125.34	0.197168	98.7627	2.1301	0.769085	1	0	NA	0.618473	15.3601	6.19959	0	0.681512	28.7674	8.06571	0	NA	NA	2967	0.0244774	12.4145	24.307	4.26806	0	4	16	24	39	50	67	74	85	104	270	485	735	997
346	Hu_04_L1b	48	20211010	8098.91	-1153.22	2966.48	0.287772	95.3506	3.54964	0.593835	1	0.0651197	NA	1.40527	19.3745	3.66505	0.0666908	1.43918	15.6024	8.13726	0	NA	NA	3057	0.0458017	15.916	29.6878	5.16143	0	9	26	41	48	58	68	87	102	117	294	497	693	907
347	Hu_04_L1b	49	20211010	5779.53	-276.774	2276.56	0.355482	100.494	4.30045	0.564307	1	0.212667	NA	4.50931	25.9575	8.77392	0.217646	4.61487	22.2331	9.95706	1	0.00524559	1.47563	2837	0.0488436	13.7401	30.9107	5.89143	0	2	13	60	81	115	146	188	218	258	619	964	1141	1172
348	Hu_04_L1b	50	20211010	11078	1237.84	2891.18	0.274976	99.9685	4.45803	0.458709	1	0.106168	NA	1.69548	31.687	70.1857	0.103358	1.65061	21.8479	9.63859	0	NA	NA	2670	0.033475	12.1738	27.6478	5.74551	0	0	0	6	22	37	46	62	72	83	176	188	188	188
349	Hu_04_L1b	51	20211010	10572.2	2581.66	2439.37	0.209562	98.1888	2.98739	0.571129	1	0.00996289	NA	1.44498	29.0213	8.67874	0.00990796	1.43701	26.9393	11.0196	0	NA	NA	1890	0.0240282	11.4659	27.9727	5.23084	0	0	0	7	14	23	33	44	55	65	212	369	514	599
350	Hu_04_L1b	52	20211010	9542.32	1099.99	2058.75	0.481027	98.7901	6.09663	0.486976	1	0.145868	NA	3.92875	27.2049	10.2427	0.121937	3.28419	100.158	639.031	0	NA	NA	4162	0.0733775	15.2543	31.0661	6.16956	0	0	6	33	61	82	102	118	141	160	411	663	916	1157
351	Hu_04_L1b	53	20211010	6386.28	4415.04	2385.66	0.557488	100.64	6.70732	0.488381	1	0.362614	NA	5.52573	22.5665	8.18812	0.358237	5.45903	19.1558	9.16221	1	0.034309	6.15422	4517	0.0627594	11.2575	28.8951	5.19352	0	13	62	104	165	211	261	311	374	418	931	1368	1823	2311
352	Hu_04_L1b	54	20211010	4312.58	4527.12	2170.54	0.376522	98.359	5.37265	0.469342	1	0.253753	NA	2.47076	64.2483	465.896	0.271733	2.64583	20.1248	10.4092	0	NA	NA	4844	0.0488708	12.9795	25.4311	5.99554	0	0	0	0	0	1	46	101	137	170	626	1026	1401	1736
353	Hu_04_L1b	56	20211010	3161.1	6075.65	1742.62	0.839941	100.289	7.43449	0.579071	2	0.266896	0.179067	5.69503	53.6239	383.098	0.246904	5.22817	48.5675	341.884	1	0.0640161	7.6215	6649	0.104059	12.3889	29.7174	6.26255	0	0	0	0	12	89	159	235	305	392	1142	1840	2425	2974
354	Hu_04_L1b	58	20211010	7628.33	4337.06	2011.66	0.657779	101.313	6.44204	0.56778	2	0.169028	0.0126549	2.96346	19.1983	7.48926	0.164505	2.89091	17.3116	9.50101	1	0.0600855	9.13461	5521	0.0619834	9.42314	26.6208	5.54802	1	18	69	116	169	220	276	333	389	448	1017	1539	1987	2329
355	Hu_04_L1b	60	20211010	6864.45	3423.63	3263.89	0.467936	101.425	5.7319	0.508523	1	0.396846	NA	4.55231	14.0904	5.97449	0.652742	7.48775	32.1724	192.609	1	0.0227211	4.8556	3794	0.0634959	13.5694	29.8993	7.51964	0	7	53	95	125	161	190	224	263	301	590	810	1003	1163
356	Hu_04_L1b	61	20211010	7001.33	2307.02	3044.58	0.137563	95.8932	2.14607	0.600493	1	0.0665513	NA	1.15271	13.561	7.20658	0.0726074	1.25761	14.8092	7.12974	0	NA	NA	2154	0.018283	13.2907	24.3177	4.89686	0	11	23	44	61	82	97	115	137	163	419	696	905	1069
357	Hu_04_L1b	62	20211010	7577.7	4504.83	3664.17	0.664988	100.092	7.22342	0.510055	1	0.125742	NA	4.24176	54.606	232.315	0.113612	3.83259	17.5597	9.63589	1	0.0660813	9.93721	4955	0.0883112	13.2801	31.1712	6.24276	0	0	0	0	4	20	46	74	95	122	393	656	876	1048
358	Hu_04_L1b	63	20211010	7173.93	4198.27	4018.77	0.520187	98.1266	5.52866	0.565766	1	0.586509	NA	6.9115	53.7129	418.713	0.590648	6.96028	21.147	7.99127	1	0.0692054	13.304	4282	0.0699531	13.4477	30.2203	6.15307	0	0	0	0	5	53	141	192	247	306	1041	1837	2615	3257
359	Hu_04_L1b	64	20211010	7440.56	4798.46	3212.3	0.0676333	83.3421	1.49717	0.536193	1	0.105378	NA	1.95644	20.5912	7.18183	0.0980996	1.82131	15.4824	9.47083	0	NA	NA	1145	0.0107202	15.8505	25.268	4.73469	0	7	33	48	66	91	118	146	167	191	487	778	1016	1129
360	Hu_04_L1b	65	20211010	7888.71	6643.73	2867.5	0.343312	95.9038	5.20885	0.455199	1	0.104381	NA	4.36773	333.355	1405.45	0.144693	6.05455	29.4231	8.75815	1	0.0469012	13.6614	2071	0.0403185	11.744	32.2633	6.01087	0	0	0	0	0	0	0	0	0	0	0	0	258	598
361	Hu_04_L1b	66	20211010	7307.46	6518.9	3221.1	0.913821	101.868	9.1235	0.499149	2	0.103039	0.0968894	3.31904	25.5242	12.4996	0.0866062	2.808	48.254	214.178	1	0.0868653	9.50572	7693	0.10946	11.9783	28.3847	6.93341	0	3	39	96	153	213	271	332	385	457	1068	1378	1477	1494

## Sheet: 02_Dense-Core_Vesicles
Analysis of structual and functional parameters of SBs in L1a and L1b of the human TLN
Dense-Core Vesicles
			bnum	number	diameter
L1a	Hu_Hu_01_L1a	1	01	12	62.79
		2	02	30	61.9
		3	03	20	57.03
		4	04	14	59.4
		5	05	0
		6	07	0
		7	08	12	64.14
		8	09	7	62.03
		9	10	8	67.13
		10	11	18	64.75
		11	12	11	62.21
		12	13	0
		13	14	20	52.67
		14	15	18	56.32
		15	16	2	52.77
		16	17	17	59.78
		17	18	5	59.45
		18	19	4	58.11
		19	20	1	52
		20	21	16	58.48
	Hu_02_L1a	1	01	0
		2	02	0
		3	03	2	53.73
		4	09	0
		5	10	16	56.24
		6	11	0
		7	12	0
		8	13	3	51.15
		9	14	0
		10	15	2	53.49
		11	16	2	56.27
		12	17	3	65.81
		13	18	1	66.14
		14	20	0
		15	21	0
		16	22	0
		17	23	0
		18	24	2	59.46
		19	25	0
		20	26	0
	Hu_03_L1a	1	01	6	44.83
		2	03	0
		3	04	0
		4	05	5	47.43
		5	06	4	47.25
		6	07	6	49.16
		7	26	3	55.18
		8	27	0
		9	28	2	52.73
		10	29	0
		11	30	5	50.75
		12	31	0
		13	32	1	48.45
		14	33	2	47.16
		15	34	1	58.09
		16	35	0
		17	37	0
		18	38	0
		19	40	0
		20	41	0
L1b	Hu_01_L1b	1	01	14	54.95
		2	02	4	57.4
		3	03	9	62.87
		4	04	3	53.15
		5	05	4	54.71
		6	06	5	43.62
		7	07	9	62.3
		8	08	2	68.58
		9	09	7	64.78
		10	10	12	63.74
		11	11	19	66.87
		12	12	11	64.5
		13	13	13	64.34
		14	14	5	77.81
		15	15	4	63.84
		16	16	2	64.15
		17	18	0
		18	19	4	57.94
		19	20	5	69.27
		20	22	0
	Hu_02_L1b	1	01	2	63.3
		2	02	24	61.09
		3	03	4	58.57
		4	04	5	58.13
		5	05	2	54.31
		6	06	1	52.71
		7	07	14	55.22
		8	08	5	53.07
		9	09	4	56.1
		10	10	0
		11	12	0
		12	13	0
		13	14	0
		14	15	0
		15	16	10	63.89
		16	18	0
		17	19	3	50.46
		18	29	4	56.85
		19	30	0
		20	31	2	61.37
	Hu_04_L1b	1	01	1	53.31
		2	02	0
		3	03	0
		4	04	0
		5	05	2	57.66
		6	06	0
		7	07	0
		8	08	0
		9	09	0
		10	10	0
		11	11	0
		12	12	0
		13	13	0
		14	14	0
		15	15	4	54.57
		16	16	0
		17	17	0
		18	18	0
		19	19	0
		20	20	0

## Sheet: 03_Synaptic_Cleft
Analysis of structual and functional parameters of SBs in L1a and L1b of the human TLN
Synaptic_Cleft_Measurements
	Hu_01_L1a					Hu_02_L1a					Hu_03_L1a					Hu_01-L1b					Hu_02_L1b					Hu_04_L1b
		Lateral 1	Lateral 2	Central			Lateral 1	Lateral 2	Central			Lateral 1	Lateral 2	Central			Lateral 1	Lateral 2	Central			Lateral 1	Lateral 2	Central			Lateral 1	Lateral 2	Central
	SC_01	22.12	22.58	27.33		SC_01	22.22	21.01	23.04		SC_01	28.43	35.33	30.02		SC_01	25.95	27.45	29.67		SC_01	21.72	25.5	21.45		SC_01	19.13	17.33	29.48
	SC_02	13.96	14.11	15.62		SC_02	23.35	31.78	26.38		SC_02	18.6	29.3	39.16		SC_02	19.87	25.12	30.88		SC_02	19.42	22.69	25.44		SC_02	24.59	25.8	32.8
	SC_03	16.02	15.7	26.86		SC_03	24.4	22.08	22.3		SC_03	26	27.95	36.89		SC_03	17.92	24.47	25.68		SC_03	24.55	19.32	33.85		SC_03	20.46	23.85	34.1
	SC_04	12.45	14.84	24.6		SC_04	24.81	21.41	29.05		SC_04	18.27	19.79	34.15		SC_04	21.4	27.72	30.9		SC_04	22.44	19.68	32.16		SC_04	23.65	25.03	34.45
	SC_05	10.01	13.73	24.31		SC_05	19.23	23.46	24.26		SC_05	22.21	24.83	33.99		SC_05	27.51	23.93	26.67		SC_05	29.96	22.49	37.56		SC_05	15.5	16	23.81
	SC_06	22.87	22.13	24.9		SC_06	20.26	19.91	25.1		SC_06	17.71	17.16	24.46		SC_06	20.86	19.08	28.19		SC_06	26.83	27.27	31.61		SC_06	20.13	19.5	32.28
	SC_07	15.13	11.7	25.37		SC_07	28.8	19.6	31.48		SC_07	22.18	17.71	24.66		SC_07	19.11	21.65	25.84		SC_07	25.28	19.17	27.64		SC_07	17.85	21.26	23.18
	SC_08	12.22	10.75	23.92		SC_08	21.5	22.29	34.98		SC_08	17.08	19.18	27.71		SC_08	24.37	21.6	27.12		SC_08	21.4	20.11	33.75		SC_08	29.32	28.11	33.03
	SC_09	25.64	15	29.16		SC_09	20.7	22.97	31.38		SC_09	24.25	21.21	37.69		SC_09	20.72	26.32	29.82		SC_09	25.24	19.99	28.18		SC_09	17.85	16.86	27.03
	SC_10	16.86	12.32	20.18		SC_10	18.58	26.28	35.21		SC_10	26.46	23.15	29.12		SC_10	28.74	34.36	33.35		SC_10	23.59	23.55	31.22		SC_10	22.83	19.03	28.19
	SC_11	16.52	12.22	25.05		SC_11	17.99	14.41	33.09		SC_11	18.53	24.42	29.12		SC_11	15.53	15.31	28.19		SC_11	19.68	23.03	29.21		SC_11	20.32	24.36	38.27
	SC_12	17.31	13.04	24.14		SC_12	26.41	19.81	27.08		SC_12	28.98	25.31	35.53		SC_12	22.2	24.11	31.22		SC_12	29.21	26.44	35.1		SC_12	13.44	17.93	31.19
	SC_13	15.7	17.46	24.94		SC_13	24.87	24.41	26.7		SC_13	16.16	17.76	19.42		SC_13	22.39	30.33	30.58		SC_13	21.65	22.05	29.71		SC_13	25.82	20.41	37.29
	SC_14	15.14	22.73	26.45		SC_14	19.4	26.9	40.44		SC_14	22.49	38.17	33.59		SC_14	29.63	19.89	30.66		SC_14	24.2	25.62	26.63		SC_14	15.54	17.41	32.76
	SC_15	19.21	15.75	26.99		SC_15	19.69	17.43	30.06		SC_15	13.46	15.97	29.32		SC_15	36.85	32.22	34.74		SC_15	21.38	19.53	28.87		SC_15	26.93	31.78	31.16
	SC_16	22.07	21.75	27.39		SC_16	20.57	25.55	29.45		SC_16	20.59	14.11	39.64		SC_16	26.95	20.73	28.31		SC_16	14.86	17.73	24.69		SC_16	22.69	24.6	32.53
	SC_17	16.54	25.88	32.22		SC_17	25.75	13.26	25.56		SC_17	18.41	14.17	31.9		SC_17	23.14	30.41	26.43		SC_17	21.04	27.32	34.24		SC_17	23.04	22.32	28.59
	SC_18	16.62	12.2	25.01		SC_18	28.43	26.03	26.27		SC_18	19.86	23.03	35.17		SC_18	32.57	30.44	39.59		SC_18	22	25.43	32.04		SC_18	20.24	20.71	24.52
	SC_19	16.54	18	24.85		SC_19	28.04	25.13	32.74		SC_19	15.84	23.72	34.24		SC_19	32.79	25.64	29.41		SC_19	26.66	29.66	33.9		SC_19	20.58	23.62	26.49
	SC_20	27.59	25.8	31.73		SC_20	27.09	21.4	26.97		SC_20	24.12	19.06	42.36		SC_20	26.16	33.38	27.17		SC_20	19.36	24.49	29.82		SC_20	29.7	34.96	31.31
	SC_21	21.03	19.37	26.89		SC_21	17.64	23.26	25.61		SC_21	17.97	19.61	31.21		SC_21	27.56	30.28	33.8		SC_21	12.49	13.83	33.59		SC_21	23.4	24.27	32.75
	SC_22	14.73	12.55	23.59		SC_22	17.84	16.2	31.49		SC_22	28.11	25.1	36.44		SC_22	20.12	23.55	23.88		SC_22	18	16.22	27.81		SC_22	20.63	19.86	32.42
	SC_23	13.65	15.53	26.4		SC_23	17.81	13.31	32.25		SC_23	17.08	21.62	37.52		SC_23	26.51	25.48	27.33		SC_23	26.01	24.93	29.86		SC_23	28.75	27.08	36.77
	SC_24	14	15.25	23.06		SC_24	25.58	24.67	29.74		SC_24	16.48	20.59	29.59		SC_24	20.36	24.78	25.69		SC_24	23.36	24.41	27.02		SC_24	20.85	22.45	33.07
	SC_25	16.54	14.5	27.4		SC_25	23.15	21.41	28.56		SC_25	18.22	16.39	28.99		SC_25	26.71	30.18	26.69		SC_25	22.53	21.41	29.36		SC_25	21.55	22.35	30.21

## Sheet: 04_Analysis_Spines vs. Shafts
Analysis of the three different pools of vesicles in L1a and L1b of the human TLN separeted into SBs either terminating on dendritic spines or shafts																																bves.num
	bname	bnum	bves.p10	bves.p20	60-200	>200	bves.num																											bves.p30	bves.p40	bves.p50	bves.p60	bves.p70	bves.p80	bves.p90	bves.p100	bves.p200	60-200	>200	bves.p300	bves.p400	bves.p500	bdcv.num	bdcv.vol
spines																																4785	4297
	Hu_01_L1a	1	3	11	445	4297	4785																									7293	6208	16	30	43	60	77	95	112	140	488	445	4297	769	947	1120	0	NA
	Hu_01_L1a	2	39	101	824	6208	7293																									4623	3830	154	205	261	309	351	402	456	511	1085	824	6208	1749	2443	3090	0	NA
	Hu_01_L1a	4	0	21	662	3830	4623																									6540	6064	53	92	131	165	219	256	298	341	793	662	-793	1200	1486	1706	0	NA
	Hu_01_L1a	8	0	6	393	6064	6540																									4268	3682	33	56	83	112	135	158	184	203	476	393	-476	789	1035	1233	0	NA
	Hu_01_L1a	11	10	54	442	3682	4268																									1345	1188	80	112	144	170	197	227	270	297	586	442	-586	886	1163	1376	0	NA
	Hu_01_L1a	12	9	13	123	1188	1345																									6106	5493	22	26	34	42	51	61	68	70	157	123	-157	257	313	328	0	NA
	Hu_01_L1a	14	17	44	479	5493	6106																									7507	6737	80	106	134	166	206	232	251	291	613	479	-613	950	1337	1673	0	NA
	Hu_01_L1a	15	18	52	632	6737	7507																									2469	2040	74	110	138	165	209	244	273	319	770	632	-770	1272	1799	2402	0	NA
	Hu_01_L1a	16	7	32	339	2040	2469																									1218	953	54	70	90	110	130	153	171	193	429	339	-429	676	875	1073	0	NA
	Hu_01_L1a	18	14	28	207	953	1218																									3315	2805	41	51	58	73	86	100	111	130	265	207	-265	380	442	460	0	NA
	Hu_01_L1a	21	10	34	394	2805	3315																									2061	1645	57	89	116	146	163	196	217	238	510	394	-510	742	949	1126	0	NA
	Hu_01_L1a	23	4	33	326	1645	2061																									2558	2083	56	77	90	112	131	148	167	190	416	326	-416	680	901	1024	0	NA
	Hu_01_L1a	24	0	15	383	2083	2558																									848	633	40	67	92	113	135	159	185	212	475	383	-475	804	1104	1317	0	NA
	Hu_01_L1a	25	3	9	180	633	848																									985	778	20	26	35	44	49	60	71	87	215	180	-215	380	464	516	0	NA
	Hu_01_L1a	26	6	15	154	778	985																									4187	3240	27	40	53	64	71	85	96	106	207	154	-207	292	401	512	0	NA
	Hu_01_L1a	31	5	57	760	3240	4187																									2348	2053	95	138	187	232	272	321	383	442	947	760	-947	1507	1969	2431	0	NA
	Hu_01_L1a	32	0	10	235	2053	2348																									2390	2005	23	41	60	80	98	113	131	149	295	235	-295	421	533	623	0	NA
	Hu_01_L1a	33	13	27	299	2005	2390																									2378	2074	47	67	86	106	127	148	169	184	385	299	-385	521	619	669	0	NA
	Hu_01_L1a	35	11	32	217	2074	2378																									4032	3907	52	65	87	108	126	144	162	174	304	217	-304	426	557	673	0	NA
	Hu_01_L1a	36	0	3	108	3907	4032																									3350	3012	6	10	17	22	28	36	47	51	125	108	-125	198	277	326	0	NA
	Hu_01_L1a	38	2	14	265	3012	3350																									2121	1622	32	52	73	95	111	132	152	167	338	265	-338	502	668	777	0	NA
	Hu_01_L1a	40	11	54	364	1622	2121																									1408	1010	82	110	135	171	206	239	271	304	499	364	-499	597	698	847	0	NA
	Hu_01_L1a	41	8	33	297	1010	1408																									4682	4272	55	72	101	132	153	176	200	221	398	297	-398	530	635	768	0	NA
	Hu_01_L1a	42	1	7	341	4272	4682																									3921	3506	26	52	69	83	96	115	143	167	410	341	-410	592	758	912	0	NA
	Hu_01_L1a	43	2	11	371	3506	3921																									4775	4061	21	31	44	58	80	107	127	153	415	371	-415	662	905	1164	0	NA
	Hu_01_L1a	45	5	38	573	4061	4775																									7315	6734	72	107	141	171	202	240	276	313	714	573	-714	1191	1563	1847	0	NA
	Hu_01_L1a	46	0	20	480	6734	7315																									3330	2947	42	69	101	128	154	180	203	230	581	480	-581	931	1229	1482	0	NA
	Hu_01_L1a	47	8	41	267	2947	3330																									4561	3803	63	93	116	135	159	175	195	216	383	267	-383	575	889	1222	0	NA
	Hu_01_L1a	48	14	46	620	3803	4561																									3767	3180	74	101	138	182	223	269	308	353	758	620	-758	1223	1609	1806	0	NA
	Hu_01_L1a	49	4	32	484	3180	3767																									2029	1325	55	78	103	126	149	173	202	236	587	484	-587	957	1310	1620	0	NA
	Hu_01_L1a	50	3	34	565	1325	2029																									5398	4690	65	110	139	172	200	237	273	314	704	565	-704	1029	1235	1332	0	NA
	Hu_01_L1a	51	16	52	563	4690	5398																									1961	1755	83	119	145	176	205	242	265	294	708	563	-708	1239	1701	2031	0	NA
	Hu_01_L1a	54	0	2	177	1755	1961																									1563	1265	15	23	29	40	48	54	62	69	206	177	-206	357	517	644	0	NA
	Hu_01_L1a	55	3	13	244	1265	1563																									2206	2102	25	37	54	70	83	96	116	131	298	244	-298	483	676	849	0	NA
	Hu_01_L1a	56	1	6	84	2102	2206																									817	443	13	18	20	24	30	36	39	45	104	84	-104	202	354	538	0	NA
	Hu_01_L1a	57	0	6	338	443	817																									1146	1061	11	19	36	45	63	78	96	119	374	338	-374	563	596	607	0	NA
	Hu_01_L1a	58	0	0	69	1061	1146																									654	525	5	10	16	21	26	29	33	34	85	69	-85	124	168	216	0	NA
	Hu_01_L1a	59	0	3	112	525	654																									1874	1604	11	14	17	22	31	42	47	60	129	112	-129	177	208	231	0	NA
	Hu_01_L1a	60	0	1	234	1604	1874																									668	501	7	20	36	48	55	65	79	90	270	234	-270	402	526	638	0	NA
	Hu_01_L1a	61	0	11	127	501	668																									617	489	20	31	40	52	61	76	83	91	167	127	-167	262	354	448	0	NA
	Hu_01_L1a	62	0	1	102	489	617																									1499	1416	10	19	26	29	38	49	59	68	128	102	-128	166	195	220	0	NA
	Hu_01_L1a	63	3	6	62	1416	1499																									1926	1522	11	13	21	24	28	33	37	42	83	62	-83	121	150	170	0	NA
	Hu_01_L1a	64	3	10	365	1522	1926																									1391	1049	20	31	39	56	75	96	115	132	404	365	-404	664	872	1042	0	NA
	Hu_01_L1a	66	7	32	269	1049	1391																									1304	1085	41	57	73	88	102	121	147	165	342	269	-342	541	725	884	0	NA
	Hu_01_L1a	67	1	15	177	1085	1304																									1221	1043	26	36	42	60	71	83	95	107	219	177	-219	352	481	595	0	NA
	Hu_01_L1a	68	0	6	150	1043	1221																									2030	1833	10	18	28	42	52	65	72	84	178	150	-178	264	329	383	0	NA
	Hu_01_L1a	69	3	8	160	1833	2030																										0	17	25	37	49	59	72	79	91	197	160	-197	276	323	385	0	NA
	Hu_01_L1b	1	0	2	234	1858	2141																									2451	2113	18	37	49	69	86	99	126	145	283	234	-283	412	567	666	0	NA
	Hu_01_L1b	2	0	0	338	2113	2451																									1258	1155	0	0	0	7	22	38	59	86	338	338	-338	619	875	1132	0	NA
	Hu_01_L1b	3	0	0	103	1155	1258																									1081	858	0	0	0	0	0	1	2	10	103	103	-103	154	198	225	0	NA
	Hu_01_L1b	4	0	1	197	858	1081																									1655	1259	8	17	26	34	44	65	75	82	223	197	-223	367	531	668	0	NA
	Hu_01_L1b	6	0	2	349	1259	1655																									2896	2591	14	32	47	76	95	113	139	161	396	349	-396	636	861	1064	0	NA
	Hu_01_L1b	7	0	6	256	2591	2896																									908	857	18	33	49	60	76	90	110	120	305	256	-305	455	595	782	0	NA
	Hu_01_L1b	8	0	0	51	857	908																									3220	2709	0	0	0	0	0	0	0	3	51	51	-51	85	107	152	0	NA
	Hu_01_L1b	9	0	0	510	2709	3220																									2387	2143	0	0	1	27	57	82	107	145	511	510	-511	938	1419	1795	0	NA
	Hu_01_L1b	10	1	10	205	2143	2387																									1627	1435	20	30	39	51	63	76	91	105	244	205	-244	434	648	890	0	NA
	Hu_01_L1b	11	0	0	192	1435	1627																									1435	1245	0	0	0	0	0	0	3	18	192	192	-192	339	429	490	0	NA
	Hu_01_L1b	12	0	0	190	1245	1435																									2229	2229	0	0	0	0	7	30	39	52	190	190	-190	293	377	462	0	NA
	Hu_01_L1b	13	0	0	0	2229	2229																									2193	1648	0	0	0	0	0	0	0	0	0	0	0	0	0	0	0	NA
	Hu_01_L1b	14	0	0	480	1648	2193																									1053	980	6	32	65	89	128	168	204	240	545	480	-545	764	936	1107	0	NA
	Hu_01_L1b	15	0	2	57	980	1053																									1219	992	6	9	16	16	19	30	37	39	73	57	-73	112	149	202	0	NA
	Hu_01_L1b	16	0	7	187	992	1219																									1473	1271	17	28	40	51	64	77	85	99	227	187	-227	351	434	472	0	NA
	Hu_01_L1b	18	0	1	168	1271	1473																									4031	3548	9	22	34	43	52	64	74	88	202	168	-202	286	340	379	0	NA
	Hu_01_L1b	19	0	0	426	3548	4031																									1734	1569	4	26	57	84	119	152	176	211	483	426	-483	698	834	910	0	NA
	Hu_01_L1b	20	0	1	137	1569	1734																									942	829	8	17	28	35	40	54	63	70	165	137	-165	266	355	422	0	NA
	Hu_01_L1b	22	0	0	110	829	942																									2220	2075	0	1	3	7	10	11	20	21	113	110	-113	176	205	256	0	NA
	Hu_01_L1b	23	0	0	132	2075	2220																									1557	1503	1	8	13	17	26	32	40	50	145	132	-145	244	372	535	0	NA
	Hu_01_L1b	24	0	0	52	1503	1557																									1924	1838	0	1	2	2	6	6	8	10	54	52	-54	111	155	181	0	NA
	Hu_01_L1b	25	0	1	74	1838	1924																									1336	1097	4	9	12	18	27	31	36	40	86	74	-86	102	123	148	0	NA
	Hu_01_L1b	26	0	0	214	1097	1336																									1333	1246	4	13	25	35	46	61	76	91	239	214	-239	379	526	626	0	NA
	Hu_01_L1b	28	0	2	76	1246	1333																									2435	2337	5	8	11	14	19	24	29	31	87	76	-87	146	207	246	0	NA
	Hu_01_L1b	30	0	0	93	2337	2435																									730	581	2	4	5	9	12	18	27	38	98	93	-98	158	191	213	0	NA
	Hu_01_L1b	31	0	0	132	581	730																									1358	1178	2	9	17	26	36	45	51	60	149	132	-149	198	246	282	0	NA
	Hu_01_L1b	32	0	2	161	1178	1358																									2595	2534	7	11	19	30	39	47	60	71	180	161	-180	279	407	479	0	NA
	Hu_01_L1b	38	0	0	61	2534	2595																									1448	1448	0	0	0	0	0	0	0	0	61	61	-61	131	182	201	0	NA
	Hu_01_L1b	39	0	0	0	1448	1448																									1961	1608	0	0	0	0	0	0	0	0	0	0	0	58	192	335	0	NA
	Hu_01_L1b	40	0	6	292	1608	1961																									2376	2342	21	40	61	83	109	119	140	167	353	292	-353	524	706	875	0	NA
	Hu_01_L1b	41	0	0	33	2342	2376																									1235	1061	0	1	1	5	8	9	9	10	34	33	-34	59	67	69	0	NA
	Hu_01_L1b	44	0	0	166	1061	1235																									729	689	3	6	8	17	23	30	43	51	174	166	-174	303	415	528	0	NA
	Hu_01_L1b	45	0	0	40	689	729																									1756	1563	0	0	0	0	0	0	0	0	40	40	-40	122	188	273	0	NA
	Hu_01_L1b	46	0	0	166	1563	1756																									2938	2605	8	14	27	38	56	61	76	88	193	166	-193	303	416	555	0	NA
	Hu_01_L1b	47	0	0	305	2605	2938																									605	605	7	14	28	44	66	83	101	120	333	305	-333	552	776	957	0	NA
	Hu_01_L1b	50	0	0	0	605	605																									294	228	0	0	0	0	0	0	0	0	0	0	0	14	52	89	0	NA
	Hu_01_L1b	51	0	2	54	228	294																									4158	3777	4	8	12	15	20	26	29	35	66	54	-66	100	121	129	0	NA
	Hu_01_L1b	53	0	0	381	3777	4158																									1449	1212	0	0	0	13	32	57	72	103	381	381	-381	684	987	1259	0	NA
	Hu_01_L1b	54	1	9	164	1212	1449																									1718	1718	33	49	73	88	106	121	135	148	237	164	-237	278	280	280	0	NA
	Hu_01_L1b	57	0	0	0	1718	1718																									1579	1454	0	0	0	0	0	0	0	0	0	0	0	0	16	87	0	NA
	Hu_01_L1b	58	0	1	103	1454	1579																									2711	2366	8	15	22	29	39	44	51	63	125	103	-125	181	229	290	0	NA
	Hu_01_L1b	61	0	3	297	2366	2711																									996	880	17	33	48	60	80	97	111	133	345	297	-345	560	845	1182	0	NA
	Hu_01_L1b	62	0	0	90	880	996																									559	389	6	17	26	34	43	53	64	70	116	90	-116	129	135	149	0	NA
	Hu_01_L1b	63	0	7	131	389	559																									470	413	14	26	39	53	62	78	85	93	170	131	-170	209	228	239	0	NA
	Hu_01_L1b	67	0	1	46	413	470																									1859	1666	6	7	11	15	20	25	29	33	57	46	-57	104	161	179	0	NA
	Hu_01_L1b	69	0	0	169	1666	1859																									2213	2137	2	12	24	39	53	63	73	85	193	169	-193	283	382	432	0	NA
	Hu_01_L1b	70	0	0	76	2137	2213																									2418	2162	0	0	0	0	0	0	0	0	76	76	-76	375	663	980	0	NA
	Hu_01_L1b	71	0	0	224	2162	2418																									2593	2553	6	13	32	44	57	72	84	108	256	224	-256	367	418	445	0	NA
	Hu_01_L1b	72	0	0	40	2553	2593																									1135	855	0	0	0	0	0	0	0	0	40	40	-40	121	209	262	0	NA
	Hu_01_L1b	73	0	0	280	855	1135																									1440	1354	0	0	0	4	17	37	56	77	280	280	-280	432	560	670	0	NA
	Hu_01_L1b	74	0	0	78	1354	1440																									2490	2490	2	6	8	9	16	19	23	29	86	78	-86	131	145	149	0	NA
	Hu_01_L1b	76	0	0	0	2490	2490																									2995	2995	0	0	0	0	0	0	0	0	0	0	0	19	178	354	0	NA
	Hu_01_L1b	78	0	0	0	2995	2995																									2247	2116	0	0	0	0	0	0	0	0	0	0	0	6	229	368	0	NA
	Hu_01_L1b	79	0	0	107	2116	2247																									5001	4138	5	15	24	32	38	43	56	72	131	107	-131	174	233	295	0	NA
	Hu_01_L1b	80	0	1	739	4138	5001																									1632	1504	30	85	124	161	204	258	310	362	863	739	-863	1337	1724	2038	0	NA
	Hu_01_L1b	81	0	0	113	1504	1632																									1791	1515	1	4	15	16	26	34	44	49	128	113	-128	197	271	332	0	NA
	Hu_01_L1b	82	0	6	230	1515	1791																										0	18	35	46	61	77	87	103	119	276	230	-276	384	474	562	0	NA
	Hu_02_L1a	2	0	2	98	710	829																									912	613	6	11	21	29	38	45	49	54	119	98	-119	164	185	190	0	NA
	Hu_02_L1a	3	1	2	264	613	912																									910	755	11	19	35	49	63	77	95	114	299	264	-299	427	481	491	0	NA
	Hu_02_L1a	9	0	8	135	755	910																									1249	968	14	16	20	26	38	52	67	83	155	135	-155	208	265	332	0	NA
	Hu_02_L1a	12	0	0	281	968	1249																									624	582	0	0	0	0	13	32	53	66	281	281	-281	474	583	647	0	NA
	Hu_02_L1a	13	0	1	38	582	624																									934	701	2	3	4	7	8	13	14	17	42	38	-42	50	51	51	0	NA
	Hu_02_L1a	14	1	5	209	701	934																									1170	1033	9	20	24	32	49	59	75	85	233	209	-233	355	440	472	0	NA
	Hu_02_L1a	21	1	4	117	1033	1170																									820	763	9	17	20	30	35	43	52	59	137	117	-137	166	167	167	0	NA
	Hu_02_L1a	22	2	4	45	763	820																									1711	1413	7	10	12	13	17	23	25	30	57	45	-57	59	59	59	0	NA
	Hu_02_L1a	23	0	1	255	1413	1711																									286	257	23	34	43	53	75	95	110	120	298	255	-298	496	627	738	0	NA
	Hu_02_L1a	25	0	3	21	257	286																									1289	1218	5	7	8	10	12	16	16	18	29	21	-29	32	32	32	0	NA
	Hu_02_L1a	27	0	0	71	1218	1289																									709	678	0	0	0	0	0	0	0	0	71	71	-71	197	272	287	0	NA
	Hu_02_L1a	28	0	0	28	678	709																									703	569	0	3	3	7	8	13	15	20	31	28	-31	31	31	31	0	NA
	Hu_02_L1a	29	0	4	112	569	703																									1994	1785	12	18	22	29	33	38	44	57	134	112	-134	195	243	259	0	NA
	Hu_02_L1a	34	0	0	209	1785	1994																									212	155	0	0	0	0	0	0	0	1	209	209	-209	395	542	643	0	NA
	Hu_02_L1a	40	2	11	33	155	212																									339	195	14	18	24	29	32	36	41	42	57	33	-57	58	58	58	0	NA
	Hu_02_L1a	41	0	14	111	195	339																									1385	1385	20	23	33	40	47	56	62	69	144	111	-144	203	221	221	0	NA
	Hu_02_L1a	43	0	0	0	1385	1385																									1114	987	0	0	0	0	0	0	0	0	0	0	0	184	420	617	0	NA
	Hu_02_L1a	44	0	4	99	987	1114																									918	746	15	21	28	33	43	51	60	64	127	99	-127	168	211	249	0	NA
	Hu_02_L1a	49	0	6	136	746	918																									410	330	16	23	36	42	55	65	74	82	172	136	-172	274	377	480	0	NA
	Hu_02_L1a	50	0	8	52	330	410																									201	88	16	21	28	34	43	46	49	54	80	52	-80	93	95	95	0	NA
	Hu_02_L1a	51	1	6	94	88	201																									534	514	9	14	19	27	35	45	53	56	113	94	-113	141	141	141	0	NA
	Hu_02_L1a	52	0	1	18	514	534																									497	467	1	1	2	4	5	6	7	8	20	18	-20	50	78	94	0	NA
	Hu_02_L1a	54	0	0	24	467	497																									371	322	3	4	6	8	9	11	11	15	30	24	-30	50	62	66	0	NA
	Hu_02_L1a	58	0	0	49	322	371																									778	676	0	0	0	0	0	0	0	0	49	49	-49	101	144	178	0	NA
	Hu_02_L1a	61	0	8	79	676	778																									1627	1449	11	19	23	29	35	42	49	53	102	79	-102	118	125	125	0	NA
	Hu_02_L1a	62	0	0	178	1449	1627																									1019	905	0	0	0	0	0	0	0	3	178	178	-178	336	495	580	0	NA
	Hu_02_L1a	63	0	0	114	905	1019																									1192	1061	0	0	0	0	0	0	0	0	114	114	-114	280	391	486	0	NA
	Hu_02_L1a	68	0	1	113	1061	1192																									1631	1439	7	13	18	30	41	45	54	59	131	113	-131	226	261	261	0	NA
	Hu_02_L1a	69	0	0	168	1439	1631																									416	416	7	16	24	30	46	61	70	81	192	168	-192	327	408	463	0	NA
	Hu_02_L1a	70	0	0	0	416	416																									1197	794	0	0	0	0	0	0	0	0	0	0	0	0	0	8	0	NA
	Hu_02_L1a	71	0	1	349	794	1197																									482	482	13	29	54	82	96	116	149	172	403	349	-403	541	667	738	0	NA
	Hu_02_L1a	76	0	0	0	482	482																									2611	2413	0	0	0	0	0	0	0	0	0	0	0	0	0	0	0	NA
	Hu_02_L1a	78	0	1	155	2413	2611																									2044	1894	14	30	43	63	74	92	103	117	198	155	-198	269	350	426	0	NA
	Hu_02_L1a	79	1	2	128	1894	2044																									761	603	5	14	22	30	37	46	52	58	150	128	-150	256	338	429	0	NA
	Hu_02_L1a	82	0	1	141	603	761																									515	485	6	8	17	23	30	40	45	54	158	141	-158	254	351	422	0	NA
	Hu_02_L1a	85	1	2	24	485	515																									1193	1134	3	5	6	8	9	11	13	13	30	24	-30	48	63	77	0	NA
	Hu_02_L1a	90	0	0	59	1134	1193																									1546	1467	0	0	0	0	0	0	0	0	59	59	-59	128	157	180	0	NA
	Hu_02_L1a	93	0	0	79	1467	1546																									1182	1070	0	0	0	0	0	0	0	0	79	79	-79	181	267	343	0	NA
	Hu_02_L1a	95	0	1	87	1070	1182																									719	616	10	14	25	30	41	47	52	58	112	87	-112	145	156	162	0	NA
	Hu_02_L1a	96	0	4	83	616	719																									576	417	10	14	20	31	41	51	57	64	103	83	-103	125	128	128	0	NA
	Hu_02_L1a	97	0	7	129	417	576																										0	19	25	30	42	49	54	62	74	159	129	-159	261	329	365	0	NA
	Hu_02_L1b	3	31	162	2372	3236	6247																									3493	3336	306	462	639	817	985	1164	1333	1479	3011	2372	-3011	4170	4763	5186	0	NA
	Hu_02_L1b	6	0	9	103	3336	3493																									7944	6438	22	35	54	69	86	102	112	122	157	103	-157	177	228	327	0	NA
	Hu_02_L1b	8	45	133	1136	6438	7944																									3902	3566	209	292	370	451	549	625	714	786	1506	1136	-1506	1945	2178	2247	0	NA
	Hu_02_L1b	9	0	0	336	3566	3902																									3690	2154	0	0	0	0	0	0	0	16	336	336	-336	768	1136	1287	0	NA
	Hu_02_L1b	10	0	9	1324	2154	3690																									18728	16387	64	140	212	304	388	472	552	640	1536	1324	-1536	2523	3177	3472	0	NA
	Hu_02_L1b	13	0	0	2330	16387	18728																									5032	3928	0	0	11	158	311	438	607	756	2341	2330	-2341	3823	5430	6992	0	NA
	Hu_02_L1b	15	0	0	1064	3928	5032																									23851	20975	0	0	40	113	193	273	353	448	1104	1064	-1104	1375	1469	1471	0	NA
	Hu_02_L1b	19	0	13	2488	20975	23851																									4170	4096	117	243	388	552	731	902	1066	1231	2876	2488	-2876	4253	5644	7344	0	NA
	Hu_02_L1b	30	0	0	74	4096	4170																									4209	4080	0	0	0	0	0	0	0	0	74	74	-74	253	453	609	0	NA
	Hu_02_L1b	31	1	4	103	4080	4209																									2018	1523	15	23	26	32	40	46	56	59	129	103	-129	188	249	361	0	NA
	Hu_02_L1b	33	1	11	420	1523	2018																									2327	1687	30	44	75	94	118	144	175	204	495	420	-495	755	914	1034	0	NA
	Hu_02_L1b	34	0	0	640	1687	2327																									2796	2137	0	0	0	0	2	51	123	165	640	640	-640	972	1145	1263	0	NA
	Hu_02_L1b	36	7	38	528	2137	2796																									3093	2935	65	99	131	163	193	232	263	296	659	528	-659	982	1211	1265	0	NA
	Hu_02_L1b	37	0	0	158	2935	3093																									1299	1299	0	0	0	0	0	0	0	0	158	158	-158	755	1449	2095	0	NA
	Hu_02_L1b	39	0	0	0	1299	1299																									1256	536	0	0	0	0	0	0	0	0	0	0	0	0	37	54	0	NA
	Hu_02_L1b	40	0	28	549	536	1256																									1059	923	76	124	171	218	265	309	352	399	720	549	-720	874	916	972	0	NA
	Hu_02_L1b	41	0	10	103	923	1059																									2966	2836	19	27	33	42	46	57	63	75	136	103	-136	177	217	249	0	NA
	Hu_02_L1b	42	3	8	86	2836	2966																									4243	3665	21	40	44	50	60	69	79	90	130	86	-130	155	259	433	0	NA
	Hu_02_L1b	43	0	0	577	3665	4243																									5509	5509	0	0	1	37	82	127	164	215	578	577	-578	766	844	855	0	NA
	Hu_02_L1b	47	0	0	0	5509	5509																									3326	2720	0	0	0	0	0	0	0	0	0	0	0	0	22	70	0	NA
	Hu_02_L1b	48	9	45	447	2720	3326																									3115	2629	81	116	159	204	227	267	304	335	606	447	-606	817	922	954	0	NA
	Hu_02_L1b	49	0	0	482	2629	3115																									1168	1006	0	0	4	31	67	95	122	148	486	482	-486	798	1107	1403	0	NA
	Hu_02_L1b	50	0	5	134	1006	1168																									3466	2903	10	20	28	36	40	56	65	74	162	134	-162	204	236	246	0	NA
	Hu_02_L1b	53	2	44	419	2903	3466																									1423	843	77	105	144	172	206	239	257	291	563	419	-563	851	1174	1532	0	NA
	Hu_02_L1b	54	3	54	424	843	1423																									3898	3297	88	117	156	196	239	270	302	340	580	424	-580	716	797	831	0	NA
	Hu_02_L1b	55	1	27	493	3297	3898																									3799	2579	54	77	108	145	178	204	236	268	601	493	-601	908	1130	1228	0	NA
	Hu_02_L1b	56	14	93	929	2579	3799																									8670	7608	157	235	291	354	412	470	530	589	1220	929	-1220	1775	2263	2635	0	NA
	Hu_02_L1b	58	0	40	869	7608	8670																									7387	6534	94	141	193	248	304	356	398	456	1062	869	-1062	1674	2272	2917	0	NA
	Hu_02_L1b	61	0	1	778	6534	7387																										0	10	45	75	118	161	219	280	326	853	778	-853	1389	1940	2604	0	NA
	Hu_03_L1a	1	0	0	268	1152	1451																									1787	1499	0	9	31	53	85	101	120	137	299	268	-299	450	562	661	0	NA
	Hu_03_L1a	3	0	25	204	1499	1787																									9373	8293	49	69	84	101	117	138	160	181	288	204	-288	391	517	596	0	NA
	Hu_03_L1a	6	0	0	1029	8293	9373																									9058	6663	0	2	51	121	192	266	334	403	1080	1029	-1080	1827	2491	3093	0	NA
	Hu_03_L1a	26	89	228	1792	6663	9058																									5728	5192	356	479	603	735	866	988	1107	1234	2395	1792	-2395	3281	3964	4602	0	NA
	Hu_03_L1a	27	7	21	443	5192	5728																									6642	4969	45	71	93	114	140	167	201	232	536	443	-536	821	1015	1069	0	NA
	Hu_03_L1a	28	55	158	1224	4969	6642																									6720	5631	257	353	449	545	638	739	840	932	1673	1224	-1673	2361	2932	3453	0	NA
	Hu_03_L1a	29	31	97	813	5631	6720																									5044	4482	158	220	276	339	394	447	504	562	1089	813	-1089	1631	2141	2567	0	NA
	Hu_03_L1a	30	1	22	469	4482	5044																									6142	5769	43	67	93	126	158	187	224	253	562	469	-562	831	1103	1381	0	NA
	Hu_03_L1a	31	0	0	373	5769	6142																									4386	3933	0	0	0	0	0	0	0	0	373	373	-373	1349	2249	3094	0	NA
	Hu_03_L1a	32	0	18	358	3933	4386																									9279	7714	39	59	95	121	145	170	195	216	453	358	-453	639	747	831	0	NA
	Hu_03_L1a	33	2	61	1281	7714	9279																									12323	11083	130	207	284	362	448	555	636	735	1565	1281	-1565	2435	3266	4034	0	NA
	Hu_03_L1a	34	0	0	1240	11083	12323																									3864	1978	0	0	0	0	0	1	11	63	1240	1240	-1240	2465	3686	4954	0	NA
	Hu_03_L1a	37	58	180	1389	1978	3864																									6168	5963	287	388	497	590	708	800	907	1014	1886	1389	-1886	2627	3084	3237	0	NA
	Hu_03_L1a	38	0	0	205	5963	6168																									1482	902	0	0	0	0	0	0	0	0	205	205	-205	805	1469	2137	0	NA
	Hu_03_L1a	41	0	6	503	902	1482																									5337	4205	22	47	77	104	128	152	187	222	580	503	-580	852	937	939	0	NA
	Hu_03_L1a	42	9	77	854	4205	5337																									4482	3704	149	217	278	344	413	473	549	615	1132	854	-1132	1534	1690	1757	0	NA
	Hu_03_L1a	43	1	29	613	3704	4482																									3664	3271	71	122	165	211	252	290	334	374	778	613	-778	1097	1371	1577	0	NA
	Hu_03_L1a	44	0	14	320	3271	3664																									3384	2717	37	55	73	88	109	132	156	182	393	320	-393	592	690	782	0	NA
	Hu_03_L1a	47	0	14	541	2717	3384																									6665	5865	51	88	126	156	205	238	263	302	667	541	-667	866	993	1065	0	NA
	Hu_03_L1a	50	0	9	680	5865	6665																									9311	7222	52	87	120	161	206	240	271	317	800	680	-800	1272	1697	1954	0	NA
	Hu_03_L1a	52	17	153	1644	7222	9311																									1980	1540	260	346	445	551	661	770	891	1007	2089	1644	-2089	2739	2863	2878	0	NA
	Hu_03_L1a	53	0	15	355	1540	1980																									4249	3198	40	57	85	107	124	148	169	206	440	355	-440	552	601	623	0	NA
	Hu_03_L1a	54	7	80	803	3198	4249																									2486	2237	142	183	248	307	361	404	461	511	1051	803	-1051	1563	1757	1822	0	NA
	Hu_03_L1a	55	2	6	213	2237	2486																									1490	963	16	23	36	46	66	79	93	103	249	213	-249	410	584	750	0	NA
	Hu_03_L1a	56	16	46	380	963	1490																									2060	1883	78	119	147	182	214	247	276	302	527	380	-527	694	809	896	0	NA
	Hu_03_L1a	57	0	7	148	1883	2060																									5969	5176	12	22	29	41	55	65	73	80	177	148	-177	282	403	495	0	NA
	Hu_03_L1a	59	9	39	661	5176	5969																									3172	1977	68	102	132	174	212	241	281	323	793	661	-793	1142	1292	1359	0	NA
	Hu_03_L1a	62	1	52	861	1977	3172																									2004	1415	164	255	334	409	475	550	632	704	1195	861	-1195	1484	1633	1731	0	NA
	Hu_03_L1a	67	21	61	438	1415	2004																									8720	7853	97	120	151	184	221	250	278	317	589	438	-589	772	876	984	0	NA
	Hu_03_L1a	74	35	76	654	7853	8720																									3543	2329	122	170	213	259	291	335	382	425	867	654	-867	1229	1491	1624	0	NA
	Hu_03_L1a	75	18	57	1008	2329	3543																									3768	2982	107	147	206	267	319	384	452	512	1214	1008	-1214	1587	1664	1705	0	NA
	Hu_03_L1a	76	14	39	647	2982	3768																										0	72	101	139	184	229	263	309	357	786	647	-786	1085	1351	1650	0	NA
	Hu_04_L1b	1	0	0	544	6584	7128																									6811	5283	0	0	0	0	0	9	52	77	544	544	-544	1019	1381	1715	0	NA
	Hu_04_L1b	3	2	41	1266	5283	6811																									3536	3492	120	194	262	338	409	480	558	640	1528	1266	-1528	2589	3710	4706	0	NA
	Hu_04_L1b	5	0	0	44	3492	3536																									2304	1704	0	0	0	0	0	0	0	1	44	44	-44	104	147	190	0	NA
	Hu_04_L1b	11	2	24	489	1704	2304																									1500	587	48	86	111	136	172	201	238	264	600	489	-600	947	1309	1516	0	NA
	Hu_04_L1b	12	0	0	890	587	1500																									3135	2991	0	0	23	106	171	220	293	354	913	890	-913	1221	1377	1464	0	NA
	Hu_04_L1b	13	0	2	116	2991	3135																									6681	4875	11	18	28	36	42	49	57	66	144	116	-144	198	239	285	0	NA
	Hu_04_L1b	15	5	38	1436	4875	6681																									4463	3537	169	278	370	458	566	669	774	869	1806	1436	-1806	2481	3014	3345	0	NA
	Hu_04_L1b	15	4	32	760	3537	4463																									5008	3903	78	127	166	221	258	312	361	415	926	760	-926	1364	1792	2174	0	NA
	Hu_04_L1b	17	0	1	948	3903	5008																									3333	2998	45	105	157	201	237	302	353	414	1105	948	-1105	1651	1949	2086	0	NA
	Hu_04_L1b	19	0	0	276	2998	3333																									3351	2949	6	34	59	75	93	114	124	148	335	276	-335	521	737	957	0	NA
	Hu_04_L1b	20	0	0	382	2949	3351																									2662	2108	0	0	20	45	84	106	131	160	402	382	-402	572	699	731	0	NA
	Hu_04_L1b	21	0	4	465	2108	2662																									2462	2322	36	67	89	126	155	184	213	240	554	465	-554	793	975	1071	0	NA
	Hu_04_L1b	22	0	1	113	2322	2462																									6654	5857	6	14	27	32	41	46	55	65	140	113	-140	183	214	232	0	NA
	Hu_04_L1b	23	0	13	656	5857	6654																									3242	2900	55	98	141	185	226	264	303	348	797	656	-797	1285	1757	2156	0	NA
	Hu_04_L1b	34	3	21	262	2900	3242																									4341	4135	41	65	80	112	133	153	175	199	342	262	-342	428	530	595	0	NA
	Hu_04_L1b	34	0	0	157	4135	4341																									6034	5496	14	35	49	63	71	78	95	102	206	157	-206	262	280	280	0	NA
	Hu_04_L1b	40	0	0	538	5496	6034																									2967	2697	0	0	0	12	53	100	130	183	538	538	-538	769	859	870	0	NA
	Hu_04_L1b	47	0	4	231	2697	2967																									3057	2763	16	24	39	50	67	74	85	104	270	231	-270	485	735	997	0	NA
	Hu_04_L1b	48	0	9	246	2763	3057																									2837	2218	26	41	48	58	68	87	102	117	294	246	-294	497	693	907	0	NA
	Hu_04_L1b	49	0	2	538	2218	2837																									2670	2494	13	60	81	115	146	188	218	258	619	538	-619	964	1141	1172	0	NA
	Hu_04_L1b	50	0	0	154	2494	2670																									1890	1678	0	6	22	37	46	62	72	83	176	154	-176	188	188	188	0	NA
	Hu_04_L1b	51	0	0	198	1678	1890																									4162	3751	0	7	14	23	33	44	55	65	212	198	-212	369	514	599	0	NA
	Hu_04_L1b	52	0	0	350	3751	4162																									4517	3586	6	33	61	82	102	118	141	160	411	350	-411	663	916	1157	0	NA
	Hu_04_L1b	53	0	13	766	3586	4517																									4844	4218	62	104	165	211	261	311	374	418	931	766	-931	1368	1823	2311	0	NA
	Hu_04_L1b	54	0	0	626	4218	4844																									2154	1735	0	0	0	1	46	101	137	170	626	626	-626	1026	1401	1736	0	NA
	Hu_04_L1b	61	0	11	358	1735	2154																									4955	4562	23	44	61	82	97	115	137	163	419	358	-419	696	905	1069	0	NA
	Hu_04_L1b	62	0	0	389	4562	4955																									4282	3241	0	0	4	20	46	74	95	122	393	389	-393	656	876	1048	0	NA
	Hu_04_L1b	63	0	0	1036	3241	4282																										0	0	0	5	53	141	192	247	306	1041	1036	-1041	1837	2615	3257	0	NA
																																	0
shafts																																3204	2859
	Hu_01_L1a	5	5	29	256	2859	3204																									3039	2611	51	74	89	103	119	139	159	174	345	256	-345	526	717	912	0	NA
	Hu_01_L1a	7	7	13	336	2611	3039																									1124	1000	39	68	92	116	141	170	193	218	428	336	-428	594	723	831	0	NA
	Hu_01_L1a	9	0	5	104	1000	1124																									5465	4632	10	17	20	22	28	37	45	55	124	104	-124	164	196	241	0	NA
	Hu_01_L1a	13	9	48	680	4632	5465																									4170	3749	79	121	153	192	241	274	331	377	833	680	-833	1298	1711	2155	0	NA
	Hu_01_L1a	17	34	75	264	3749	4170																									2580	2083	106	131	157	181	203	223	247	270	421	264	-421	562	711	871	0	NA
	Hu_01_L1a	19	15	36	380	2083	2580																									2388	2246	59	90	117	143	175	201	229	250	497	380	-497	646	745	801	0	NA
	Hu_01_L1a	30	1	4	117	2246	2388																									1476	1276	9	15	25	31	36	47	59	69	142	117	-142	210	297	349	0	NA
	Hu_01_L1a	70	1	14	150	1276	1476																										0	27	40	50	67	76	84	95	108	200	150	-200	275	332	347	0	NA
	Hu_01_L1b	5	0	6	272	1681	2004																									2547	2181	24	36	51	70	85	105	126	143	323	272	-323	496	621	689	0	NA
	Hu_01_L1b	34	0	0	364	2181	2547																									1036	869	0	0	2	21	52	78	100	123	366	364	-366	638	965	1327	0	NA
	Hu_01_L1b	42	0	9	138	869	1036																									749	685	14	21	29	43	56	63	70	82	167	138	-167	234	289	340	0	NA
	Hu_01_L1b	43	0	0	60	685	749																									1906	1602	0	2	4	8	10	10	13	15	64	60	-64	117	164	177	0	NA
	Hu_01_L1b	52	0	0	304	1602	1906																									1431	1305	0	0	0	0	0	0	0	11	304	304	-304	535	719	831	0	NA
	Hu_01_L1b	55	0	0	126	1305	1431																									2672	2584	0	0	0	0	0	4	10	15	126	126	-126	252	417	550	0	NA
	Hu_01_L1b	56	0	0	84	2584	2672																									2241	2150	1	3	4	9	12	16	21	25	88	84	-88	143	221	299	0	NA
	Hu_01_L1b	65	0	0	91	2150	2241																									534	435	0	0	0	0	0	0	0	0	91	91	-91	273	430	532	0	NA
	Hu_01_L1b	66	0	0	73	435	534																										0	12	19	26	33	40	43	48	55	99	73	-99	147	200	239	0	NA
	Hu_02_L1a	10	2	6	199	1511	1744																									541	268	19	29	34	43	55	71	81	95	233	199	-233	396	538	632	0	NA
	Hu_02_L1a	11	6	16	217	268	541																									981	706	26	44	56	69	83	99	118	126	273	217	-273	364	430	458	0	NA
	Hu_02_L1a	18	1	2	242	706	981																									1428	1125	15	25	33	47	60	80	101	120	275	242	-275	423	528	594	0	NA
	Hu_02_L1a	20	1	12	258	1125	1428																									758	596	17	28	45	54	64	81	104	117	303	258	-303	453	565	588	0	NA
	Hu_02_L1a	30	1	7	143	596	758																									2595	2258	11	14	19	23	32	35	44	57	162	143	-162	283	374	433	0	NA
	Hu_02_L1a	31	7	21	263	2258	2595																									2848	2196	37	51	74	93	111	133	154	180	337	263	-337	437	535	608	0	NA
	Hu_02_L1a	33	4	16	570	2196	2848																									620	429	39	63	82	108	135	163	189	224	652	570	-652	1192	1688	2033	0	NA
	Hu_02_L1a	37	6	15	154	429	620																									1055	1003	22	29	37	42	54	70	76	82	191	154	-191	281	306	308	0	NA
	Hu_02_L1a	39	0	0	49	1003	1055																									683	582	0	2	3	5	8	8	14	21	52	49	-52	77	85	85	0	NA
	Hu_02_L1a	56	0	0	100	582	683																									1441	1113	1	1	1	7	7	11	22	24	101	100	-101	158	167	173	0	NA
	Hu_02_L1a	60	2	7	282	1113	1441																									378	224	19	36	46	64	92	98	116	145	328	282	-328	477	656	780	0	NA
	Hu_02_L1a	67	3	6	133	224	378																									613	464	10	15	21	32	41	55	63	69	154	133	-154	218	226	226	0	NA
	Hu_02_L1a	80	0	3	118	464	613																									367	287	12	20	31	39	46	55	67	76	149	118	-149	185	199	227	0	NA
	Hu_02_L1a	81	0	1	51	287	367																									374	300	9	22	29	34	41	46	48	53	80	51	-80	92	100	115	0	NA
	Hu_02_L1a	88	0	1	69	300	374																									1333	1200	1	4	5	10	14	20	27	30	74	69	-74	125	152	154	0	NA
	Hu_02_L1a	91	0	0	119	1200	1333																									573	502	2	9	14	18	28	37	42	50	133	119	-133	194	245	283	0	NA
	Hu_02_L1a	94	0	1	66	502	573																									1799	1549	1	5	5	14	21	26	29	35	71	66	-71	106	123	125	0	NA
	Hu_02_L1a	98	1	10	202	1549	1799																										0	22	35	48	62	80	90	102	122	250	202	-250	377	469	539	0	NA
	Hu_02_L1b	4	0	0	741	4158	4899																									8030	7342	0	0	0	0	0	0	0	0	741	741	-741	1709	2638	3266	0	NA
	Hu_02_L1b	5	0	16	542	7342	8030																									2850	2730	65	99	146	190	220	266	308	353	688	542	-688	968	1218	1478	0	NA
	Hu_02_L1b	7	0	2	107	2730	2850																									14708	11344	6	8	13	16	19	22	25	32	120	107	-120	179	203	231	0	NA
	Hu_02_L1b	14	0	136	2724	11344	14708																									5661	5466	301	458	640	811	1001	1187	1390	1580	3364	2724	-3364	4466	4968	5209	0	NA
	Hu_02_L1b	16	0	0	161	5466	5661																									2655	1845	14	22	34	44	48	62	73	83	195	161	-195	277	349	427	0	NA
	Hu_02_L1b	29	0	19	642	1845	2655																									2677	1487	67	113	168	225	281	326	378	436	810	642	-810	1035	1167	1235	0	NA
	Hu_02_L1b	32	29	96	902	1487	2677																									3093	2935	155	217	288	345	421	480	562	624	1190	902	-1190	1505	1596	1600	0	NA
	Hu_02_L1b	38	0	0	158	2935	3093																									2609	1863	0	0	0	0	0	0	0	0	158	158	-158	755	1449	2095	0	NA
	Hu_02_L1b	44	0	0	746	1863	2609																									1154	785	0	0	0	0	27	83	135	183	746	746	-746	1362	1831	1972	0	NA
	Hu_02_L1b	45	0	13	292	785	1154																									2181	1607	32	48	77	103	123	144	169	185	369	292	-369	484	578	684	0	NA
	Hu_02_L1b	46	9	32	438	1607	2181																										0	66	100	136	173	199	243	283	317	574	438	-574	745	834	891	0	NA
	Hu_03_L1a	5	9	42	331	5132	5586																									2810	2254	66	98	123	145	163	184	214	233	454	331	-454	665	858	1005	0	NA
	Hu_03_L1a	35	0	0	556	2254	2810																									11360	10167	0	0	0	0	0	0	0	31	556	556	-556	993	1447	1743	0	NA
	Hu_03_L1a	40	0	0	1193	10167	11360																									2388	2030	0	0	0	0	58	124	204	286	1193	1193	-1193	2118	2674	2931	0	NA
	Hu_03_L1a	49	0	11	288	2030	2388																									2497	1684	39	53	70	83	102	124	153	171	358	288	-358	502	586	636	0	NA
	Hu_03_L1a	58	17	59	626	1684	2497																									5075	3985	103	151	187	238	275	317	358	407	813	626	-813	1080	1223	1320	0	NA
	Hu_03_L1a	60	4	62	863	3985	5075																									5177	4305	132	183	227	274	330	385	438	504	1090	863	-1090	1719	2256	2559	0	NA
	Hu_03_L1a	61	0	36	700	4305	5177																									2988	1985	77	125	172	208	246	290	339	384	872	700	-872	1255	1515	1779	0	NA
	Hu_03_L1a	63	0	28	865	1985	2988																									6060	4880	70	106	138	187	250	305	365	419	1003	865	-1003	1407	1673	1727	0	NA
	Hu_03_L1a	64	0	0	1180	4880	6060																									3019	2696	0	0	0	47	133	224	310	389	1180	1180	-1180	1640	1925	2095	0	NA
	Hu_03_L1a	65	0	16	245	2696	3019																									2531	1600	42	62	78	93	113	131	148	171	323	245	-323	490	698	966	0	NA
	Hu_03_L1a	68	15	65	752	1600	2531																									6810	5167	101	143	179	222	264	309	360	398	931	752	-931	1535	1771	1773	0	NA
	Hu_03_L1a	69	43	127	1258	5167	6810																									2347	1957	221	290	385	462	549	630	717	802	1643	1258	-1643	2456	3323	4084	0	NA
	Hu_03_L1a	70	0	0	390	1957	2347																									7517	6503	0	0	0	0	0	0	0	3	390	390	-390	784	1150	1458	0	NA
	Hu_03_L1a	73	44	104	733	6503	7517																									2081	1689	171	226	281	334	382	456	506	563	1014	733	-1014	1265	1391	1481	0	NA
	Hu_03_L1a	79	6	40	285	1689	2081																									3429	2845	59	86	107	119	140	159	180	194	392	285	-392	628	817	910	0	NA
	Hu_03_L1a	80	30	62	435	2845	3429																										0	87	119	149	186	214	248	274	302	584	435	-584	837	1079	1097	0	NA
	Hu_04_L1b	2	0	0	1552	5334	6886																									9335	8330	0	0	0	7	82	204	292	395	1552	1552	-1552	2460	3373	4024	0	NA
	Hu_04_L1b	4	1	35	845	8330	9335																									3865	2732	72	110	160	199	253	301	348	411	1005	845	-1005	1648	2149	2348	0	NA
	Hu_04_L1b	6	0	69	844	2732	3865																									4732	3819	163	226	289	370	444	506	593	653	1133	844	-1133	1484	1716	1898	0	NA
	Hu_04_L1b	7	3	45	725	3819	4732																									4356	2998	103	153	188	241	299	343	395	444	913	725	-913	1306	1724	2244	0	NA
	Hu_04_L1b	8	0	0	1324	2998	4356																									3506	3404	0	2	34	145	234	301	357	447	1358	1324	-1358	2119	2616	2980	0	NA
	Hu_04_L1b	9	0	3	77	3404	3506																									1507	1126	12	18	25	29	37	42	49	53	102	77	-102	120	137	153	0	NA
	Hu_04_L1b	10	0	0	346	1126	1507																									4297	2712	2	21	35	52	66	88	111	130	381	346	-381	564	575	575	0	NA
	Hu_04_L1b	18	0	5	1296	2712	4297																									4734	3290	109	215	289	390	485	585	662	749	1585	1296	-1585	2295	2877	3273	0	NA
	Hu_04_L1b	24	0	0	1444	3290	4734																									11303	7725	0	0	0	0	19	116	259	337	1444	1444	-1444	2602	3458	4083	0	NA
	Hu_04_L1b	26	0	5	2998	7725	11303																									6655	5649	109	357	580	766	933	1123	1316	1534	3578	2998	-3578	5427	6934	7843	0	NA
	Hu_04_L1b	27	0	0	891	5649	6655																									6181	5314	2	34	115	171	230	279	332	399	1006	891	-1006	1637	2277	2890	0	NA
	Hu_04_L1b	31	0	6	724	5314	6181																									1902	1225	48	112	143	186	230	281	331	378	867	724	-867	1298	1652	1904	0	NA
	Hu_04_L1b	32	1	14	557	1225	1902																									3153	1802	50	85	120	159	190	226	263	299	677	557	-677	1059	1359	1522	0	NA
	Hu_04_L1b	36	0	15	1120	1802	3153																									4125	3297	95	162	231	301	360	425	505	567	1351	1120	-1351	2078	2387	2474	0	NA
	Hu_04_L1b	37	0	19	681	3297	4125																									995	641	76	116	147	202	245	289	342	386	828	681	-828	968	1055	1087	0	NA
	Hu_04_L1b	38	0	6	281	641	995																									5636	4692	28	52	73	101	117	139	168	185	354	281	-354	422	504	554	0	NA
	Hu_04_L1b	42	1	28	735	4692	5636																									4114	3085	104	160	209	253	293	359	406	455	944	735	-944	1348	1760	2209	0	NA
	Hu_04_L1b	43	0	0	997	3085	4114																									5432	4698	0	0	32	117	231	309	370	451	1029	997	-1029	1413	1674	1818	0	NA
	Hu_04_L1b	46	0	0	734	4698	5432																									3794	3204	0	0	0	0	2	18	64	107	734	734	-734	1529	2321	2904	0	NA
	Hu_04_L1b	60	0	7	465	3204	3794																									1145	658	53	95	125	161	190	224	263	301	590	465	-590	810	1003	1163	0	NA
	Hu_04_L1b	64	0	7	421	658	1145																									2071	2071	33	48	66	91	118	146	167	191	487	421	-487	778	1016	1129	0	NA
	Hu_04_L1b	65	0	0	0	2071	2071																									7693	6625	0	0	0	0	0	0	0	0	0	0	0	0	258	598	0	NA
	Hu_04_L1b	66	0	3	915	6625	7693																											39	96	153	213	271	332	385	457	1068	915	-1068	1378	1477	1494	0	NA
[truncated: 4 more columns]
