# Supplementary material for: Ultrastructural sublaminar-specific diversity of excitatory synaptic boutons in layer 1 of the adult human temporal lobe neocortex
Source: eLife. 2025 Jul 21;13:RP99473. doi: 10.7554/eLife.99473 (PMC12279374; doi:10.7554/eLife.99473)
Supplement: Source data 3. [file elife-99473-data3.xlsx]

## Sheet: L1a shaft
Measurements of 'docked' SVs (DV) in SBs terminating on dendritic shafts obtained by EM-Tomography in L1a of the human TLN
L1a shaft	Total cylinder surface area	Total cylinder surface area	DV
1	13596.3	5819.46	5
2	28485.4	11591.2	5
3	19411.6	7064.32	4
4	23758	4399.55	2
5	16030.4	5309.72	3
6	25340.5	5589.18	5
7	24903.1	8927.46	4
8	12518.1	6851.46	4
9	24334.6	6253.53	6
10	20721.3	5018.12	5
11	24888.8	7443.87	2
12	17270	7063.08	3
13	23592.2	4400.83	2
14	46025.3	7726.24	5
15	7978.52	7978.52	2
16	23677	3828.94	4
17	10571.6	4246.52	3
18	11458.5	4247.65	5
19	12346.7	15341.5	2
20	33349.6	7264.66	2
21	13051.6	5445.5	5
22	12345.7	4246.52	6
23	12236.4	7726.24	2
24	11346.2	4400.83	1
25	12546.3	15341.5	4

## Sheet: L1a Spine
Measurements of 'docked' SVs (DV) in SBs terminating on dendritic spine obtained by EM-Tomography in L1a of the human TLN
L1a Spine	Total cylinder surface area	Total cylinder surface area	DV
	24751.1	83416.2	5
1	17211.2	5912.67	3
2	18363.2	4608.5	5
3	23520.8	9153.87	5
4	31797.6	5015.12	4
5	45424.5	15888.2	2
6	15414.8	7366.39	4
7	20115.2	6437.97	6
8	22929.5	8312.23	1
9	19153.7	3381.9	3
10	18261.2	5700.28	4
11	18259.2	6527.26	2
12	36168.5	5260.44	4
13	23336.6	4227.82	2
14	26017.6	6431.98	4
15	7918.49	5720.71	5
16	23936.2	8776.85	3
17	27274	3992.42	5
18	21521.4	5011.8	2
19	14316.3	5876.92	4
20	36248.2	5909.02	3
21	27182.5	8862.04	4
22	23336.6	8776.85	5
23	26017.6	3992.42	4
24	21521.4	5260.44	3
25	14316.3	8776.85	6

## Sheet: L1 b Shaft
Measurements of 'docked' SVs (DV) in SBs terminating on dendritic shafts obtained by EM-Tomography in L1b of the human TLN
L1 b Shaft	Total cylinder surface area	Total cylinder surface area	DV
1	31668.2	5212.04	5
2	24225	4774.28	2
3	17541.2	5608.56	4
4	24729.4	6475.4	3
5	23117.2	4754.36	1
6	19169.7	2474.3	5
7	25536.7	7226.4	2
8	21516.5	7335.23	4
9	20819.9	6899.03	3
10	17798.9	6523.95	5
11	18830	6795.83	1
12	35367.5	6510.69	3
13	64058.8	11456.7	5
14	23426.8	7209.41	6
15	25532.4	7471.95	4
16	24617.3	6960.77	2
17	18260.3	5227.55	6
18	20905.1	7329.51	2
19	16623.4	7440.8	3
20	12830.7	5712.97	4
21	22220	7239.17	3
22	13027.1	6533.28	3
23	17433.7	5438.94	5
24	30901.4	13660.6	2
25	18652.9	5405.52	4

## Sheet: L1b Spine
Measurements of 'docked' SVs (DV) in SBs terminating on dendritic spines obtained by EM-Tomography in L1b of the human TLN
L1b Spine	Total cylinder surface area	Total cylinder surface area	DV
1	30405.1	5631.3	5
2	29439.4	10816.7	2
3	10988.8	4297.97	4
4	18422	7249.32	3
5	20788	5183.66	5
6	41032.1	18983.2	1
7	27575.1	7324.89	2
8	32403	9615.44	5
9	14330.5	5094.15	2
10	26000.3	6329.36	4
11	20601.1	5303.87	3
12	39077.6	12399.8	4
13	33354.2	14098.9	4
14	40574.7	9531.7	3
15	20939.2	6175.26	5
16	14080.4	7691.26	2
17	32338.7	12190.6	2
18	24194.5	7997.57	5
19	14144.2	4974.72	4
20	25302.2	6267.26	2
21	29576	6321.14	3
22	40644.7	5985.15	5
23	37397.6	3772.46	2
24	31423.3	4324.25	3
25	25236.8	11971.6	4

## Sheet: Vesicle_Diameter
Measurements of SV diameter in SBs obtained by TEM tomography in L1a and L1b of the human TLN
L1a																	L1b
Grid_C1_Tilt_1		Grid_C1_Tilt_2		Grid_C1_Tilt_4		Grid_C1_Tilt_6		Grid_C1_Tilt_7		Grid_C1_Tilt_8		Grid_C1_Tilt_9		Grid_C1_Tilt_10			Grid_D1_Tilt_1				Grid_D1_Tilt_2		Grid_D1_Tilt_3		Grid_D1_Tilt_4		Grid_D1_Tilt_5		Grid_D1_Tilt_6		Grid_D1_Tilt_7		Grid_D1_Tilt_8		Grid_D1_Tilt_9		Grid_D1_Tilt_10
Bouton_01	Bouton_02	Bouton_01	Bouton_02	Bouton_01	Bouton_02	Bouton_01	Bouton_02	Bouton_01	Bouton_02	Bouton_01	Bouton_02	Bouton_01	Bouton_02	Bouton_01	Bouton_02		Bouton_01	Bouton_02	Bouton_03	Bouton_04	Bouton_01	Bouton_02	Bouton_01	Bouton_02	Bouton_01	Bouton_02	Bouton_01	Bouton_02	Bouton_01	Bouton_02	Bouton_01	Bouton_02	Bouton_01	Bouton_02	Bouton_01	Bouton_02	Bouton_01	Bouton_02
21.3741	26.9349	27.8066	20.224	24.2194	23.1729	32.3949	33.3802	29.0753	27.0872	32.7641	25.6962	27.2461	26.2862	11.605	12.6115		26.6515	28.9939	35.8585	38.6217	19.6873	29.0574	41.3098	35.9438	24.1885	37.8343	31.9309	23.6089	34.7343	34.0472	29.5382	35.2757	30.6064	34.0285	28.3919	33.9725	38.9981	22.4931
25.4976	31.4112	29.0932	26.274	26.5959	25.0479	42.861	30.5407	30.0826	30.579	26.4576	23.1477	40.6942	37.2128	10.8449	15.6126		29.0445	25.0382	38.2273	39.713	24.4881	24.7178	30.6818	27.9523	26.4629	32.1513	26.8717	27.4685	32.3616	31.0674	39.2052	31.9371	30.4435	25.6593	24.0768	40.3473	35.0654	30.5841
21.5786	31.1973	26.8012	31.1072	31.1519	25.0479	27.3186	33.6808	25.0281	24.0549	30.3448	19.6284	35.8048	25.3461	11.7095	12.5145		39.4194	32.708	42.5102	43.6688	36.382	31.0002	38.8555	24.721	22.7546	32.4326	29.2395	23.778	23.7107	30.4609	30.6645	22.8636	34.5712	28.2462	30.0106	28.7845	32.2788	29.0307
26.5114	25.7918	41.3103	29.6962	28.5134	23.4083	22.7306	29.1901	31.4123	22.8711	30.2286	30.369	37.5183	31.8819	13.2937	13.6332		40.1566	28.7433	45.9098	33.6424	32.8542	26.7638	36.7037	19.8879	24.8482	35.0935	33.7343	28.0275	24.9378	28.9535	34.3169	27.9338	29.3211	29.2289	41.6425	40.7075	34.3899	25.4333
29.4322	43.3541	31.1806	28.9822	29.1492	31.8386	26.5082	35.9963	30.8109	18.5707	21.2921	25.88	26.4486	31.1572	14.8526	19.0096		29.9137	35.3944	41.2024	34.6983	35.2592	31.8256	32.4773	21.9049	24.5603	31.4529	30.6384	23.3319	37.2233	46.1722	31.6083	30.5079	35.9454	30.6729	31.0697	36.0877	34.0472	28.0193
29.7884	31.6942	20.3484	28.9821	26.9983	27.2984	27.2766	28.4023	23.5739	26.9157	36.7834	28.0982	42.7473	27.2461	11.7094	15.1571		30.9561	35.1414	33.0598	31.6208	31.093	30.8167	36.2542	35.6497	24.1885	33.1407	27.4566	30.0104	31.0673	24.1266	33.1101	42.9965	37.897	28.1836	37.8886	35.9943	30.117	38.5088
32.0611	33.0729	35.5995	36.3154	29.7352	28.1386	20.3309	24.6993	25.2761	30.8053	36.3337	28.5792	35.1612	36.4763	14.9139	12.1187		34.7577	20.7638	31.0263	34.7576	30.8333	32.6301	26.7058	34.3998	25.1334	22.2405	28.9417	29.4211	28.7813	36.4127	28.0868	28.2513	29.6162	35.3764	30.9895	42.383	31.0439	24.792
19.1174	38.0917	30.1361	28.0374	28.0561	37.0116	31.8588	34.2008	33.9767	19.7777	30.6911	23.879	42.2435	38.5319	10.1482	16.0172		33.3407	28.5122	31.8826	43.8338	27.5782	27.9197	28.9402	28.8091	20.1284	26.8095	44.4806	25.0086	26.9513	29.6331	32.9733	28.2512	37.2022	30.8164	42.7044	37.9084	30.9494	26.0915
24.3701	25.7918	28.7769	26.0453	23.6791	24.4389	34.5556	35.146	28.7397	31.9849	36.7834	24.8519	39.0105	37.2126	12.2188	17.0493		35.6585	31.8469	35.025	34.728	32.1341	30.7904	26.7059	35.3069	22.0907	24.1135	30.7795	29.1648	36.31	25.8683	34.284	31.6967	35.4231	31.1298	37.2262	34.2358	35.3707	38.1741
27.3272	27.4277	36.4253	29.6962	23.4961	26.9449	34.8864	33.5977	27.5832	22.8205	33.6136	25.0656	40.5537	33.7948	11.9414	14.073		30.3524	27.2621	30.6602	41.0656	30.2345	28.0356	31.4079	23.4767	25.056	27.3316	36.6086	34.0265	41.1285	31.5441	20.9407	34.1369	21.4402	29.1384	27.5467	28.4313	28.7896	34.2451
29.0718	30.8012	28.1338	31.2032	30.2742	28.1871	32.7823	32.6034	33.1718	30.1983	29.6002	29.0525	35.8048	28.6758	15.0158	16.4674		30.9562	35.3944	39.037	34.5195	27.2849	32.6302	29.8009	26.2476	32.3803	32.4326	32.0664	31.2678	33.7536	25.2353	22.1983	32.7647	39.8777	31.5803	32.5174	34.1702	35.0654	33.618
35.096	25.3994	31.1806	40.4479	27.9403	28.5734	33.8847	35.9262	31.5883	24.9523	32.0026	30.9682	37.7838	37.1743	11.7355	12.8033		35.4169	27.8107	30.3469	30.9286	21.1555	32.4061	23.2016	25.0144	19.3414	32.7116	36.0121	24.36	33.4204	31.5439	40.5932	38.6228	38.1258	28.0264	35.446	36.0877	34.5883	36.0237
33.1656	25.7917	27.6001	27.17	24.6168	35.7311	25.8946	26.1855	24.2691	27.553	19.6275	27.7158	32.5028	30.835	8.40765	13.8108		42.6002	32.4774	31.8827	31.4901	25.5119	33.897	25.8743	31.0828	28.6472	36.9435	38.3427	24.1745	33.4576	31.5441	33.3821	32.3338	30.6064	30.5863	26.8609	38.3793	36.6998	37.5418
27.3271	43.354	23.4799	30.2289	27.4341	34.4427	22.0641	28.5791	30.5398	28.946	29.7586	22.0462	32.4588	30.4622	9.65587	9.93581		33.4199	31.3372	29.6224	31.7832	26.7161	25.269	32.3297	26.2477	25.2617	28.5597	34.871	25.5628	27.9036	24.0232	29.1918	37.9569	28.9372	26.3717	26.4408	40.3472	35.9464	35.8758
27.198	30.8013	33.9888	37.3179	32.6063	33.3105	30.6464	30.2088	29.0752	25.1832	30.4222	29.618	41.1478	29.5102	10.1782	14.3942		44.6455		28.5167	32.3937	30.2345	29.8008	28.1019	33.6375	26.9717	27.1463	25.2651	24.0915	34.0472	23.8675	37.6764	36.4489	43.0536	27.9321	22.1388	34.4972	29.0935	31.1547
25.4976	30.8012	30.4381	32.2101	25.6886	33.962	27.3187	25.6015	37.3942	28.0525	25.277	27.4797	32.1495	37.3275	13.2707	11.6049		30.9348		29.8271	34.5195	29.4503	41.0539	26.5005	18.9275	23.4273	24.197	32.9986	31.1234	23.6581	31.936	27.1039	29.3146	32.8009	23.9514	25.4336	39.2186	30.7593	40.8005
24.905	26.093	33.2058	31.0751	23.4962	32.5198	29.8494	27.4085	31.0796	35.1234	38.5909	27.3066	28.7753	32.1049	11.9159	12.7078		29.9799		31.6913	28.756	29.7468	37.1149	37.2762	28.8654	22.7546	26.5446	26.8716	33.5527	26.8589	28.9966	39.806	30.0021	43.4844	29.1686	30.3405	30.7458	31.0441	22.1322
28.9506	24.1377	35.8558	32.2101	23.9057	33.1456	30.9075	38.4349	27.3055	24.5784	24.7132	31.7433	33.8371	26.717	9.78132	13.8108		34.0468		26.528	39.4121	25.8819	29.0293	31.4514	31.2127	18.5209	31.292	32.9986	32.5842	27.5447	33.7168	29.6146	31.6162	33.14	37.6018	35.446	34.8536	30.7911	26.8702
27.0363	28.3482	27.6003	34.3967	26.0222	23.6989	16.9423	29.1901	31.6977	26.5695	30.6912	28.5792	41.1478	35.4847	11.1769	15.0158		35.9907		34.1967	39.9304	24.0967	33.6089	21.4897	30.7947	20.917	24.2803	34.3705	26.6926	25.675	36.5831	26.5988	32.8812	24.4709	26.204	31.8994	31.4677	30.6637	29.1691
36.6631	31.1973	29.2108	32.4876	29.5168	31.4926	27.1077	28.4022	27.1783	28.2991	22.7845	31.5934	30.4622	30.2269	10.8449	11.6049		32.0263		29.0001	39.5568	29.4503	44.1907	38.1635	37.4459	17.8082	26.4303	30.7795	26.0857	34.7343	24.9379	30.958	28.2512	36.934	33.2147	31.1097	33.1699	21.8845	35.2331
25.4976	28.3875	29.0536	34.3967	26.474	34.7989	24.4346	31.194	19.1638	22.4627	32.222	32.6815	31.0194	35.6451	12.9217	14.6668		26.4677		30.8655	38.2653	23.4819	36.4762	25.6623	33.1031	20.9169	31.1628	30.6384	29.0789	33.7537	23.658	30.4054	38.4575	34.9996	20.6252	31.5859	28.6281	33.8167	32.7867
34.7944	25.3994	32.049	33.3363	24.0855	27.3986	22.7304	34.2744	23.5445	25.9079	33.9265	22.8904	28.6758	37.9721	15.0158	15.0158		36.5915		39.5015	34.8931	25.4257	27.9197	34.378	26.2168	18.3454	31.7723	44.4805	27.8125	31.0674	24.1266	38.5072	36.0266	27.9322	30.0627	37.9214	33.2713	26.6016	29.6709
32.0883	27.9117	27.8888	26.9859	26.9583	25.0479	27.9419	25.6014	27.4825	32.6651	28.7957	24.3459	40.5889	37.0588	11.9158	13.9644		45.0727		39.5675	33.0091	30.2587	27.3332	23.0243	35.8536	23.3442	28.5951	30.6384	28.4352	29.633	33.1588	32.9733	31.4951	31.2093	35.8965	31.5465	41.6346	34.0185	31.9573
27.8367	29.4299	24.4349	36.0119	24.9648	38.2135	26.5081	23.1177	24.0108	27.4269	35.2508	20.5431	28.8743	34.8349	12.7078	12.1187		35.8065		37.1438	35.3807	29.7468	28.8616	27.784	27.5434	22.0907	30.6072	35.0364	32.0268	33.864	37.9842	35.0984	33.5722	34.8217	25.0677	24.4867	32.727	27.8579	26.2641
30.0526	25.0453	23.48	32.9753	26.9584	37.1963	24.8539	35.9263	30.3806	28.8658	21.9441	23.554	34.8348	34.8348	13.2707	13.0858		29.9799		33.762	33.9642	25.7118	30.3665	27.3628	23.7853	20.9788	27.4422	25.2651	29.1649	24.6872	35.5833	33.6183	30.6747	29.3209	33.8724	31.0697	42.197	29.4941	25.407
33.7432	26.8934	32.1557	31.1072	20.6116	36.4146	27.2766	35.5027	30.6078	25.9971	32.3312	25.2543	30.8348	44.2246	15.6127	15.6126		32.5585		35.0593	34.7947	37.0197	24.7177	25.9534	24.4574	18.7639	31.549	26.6016	30.0936	33.8641	28.5644	38.7996	32.0966	31.7226	30.3547	33.2737	37.4616	29.494	28.4941
29.1923	27.0589	39.5854	29.6962	32.4406	36.4523	31.0926	27.1312	23.5445	26.5694	23.4449	23.1478	31.7472	37.0588	11.0398	12.3429		31.4011		36.9627	32.3098	35.617	36.454	26.9857	33.3227	23.6746	35.8619	24.5107	24.1951	30.2971	33.717	42.4443	26.1906	31.5262	30.1212	32.5174	38.1446	32.1878	29.5349
24.6568	28.7392	33.1713	29.6626	32.0729	33.7598	28.7521	31.7546	28.2779	25.9079	35.2508	24.4675	30.6024	39.7717	14.3941	13.0858		39.1566		33.7188	33.3876	31.109	34.3718	29.5938	38.2172	26.5606	42.9573	35.0364	30.8165	29.9669	43.6234	32.2805	34.5454	30.3209	29.3496	34.8442	28.517	30.6957	30.6716
29.4322	26.9349	33.3089	28.2501	15.6105	26.1713	28.7919	31.1941	30.8109	30.8053	32.2219	31.8736	32.5027	38.1222	12.4901	16.4119		30.9347		23.1623	36.8976	32.3457	34.6302	31.408	26.2477	33.2288	26.6962	35.0364	26.9352	33.5319	27.1353	30.0691	27.2872	29.0657	31.9138	33.1614	36.4899	32.6101	27.0444
24.3701	34.3963	30.8487	25.4643	28.9264	29.8397	29.7723	25.6014	30.2663	30.5791	31.0337	28.3292	37.0973	42.2435	11.2584	11.6049		31.7985		40.7061	38.5329	22.5263	40.8162	19.8367	31.8553	26.1925	32.7116	28.0291	25.6411	21.4523	30.6239	32.9733	34.1743	41.105	29.1382	28.3919	31.7517	29.7251	35.29
23.601	31.4113	44.893	36.8336	36.8302	31.449	27.1078	33.979	36.5509	23.8132	29.4811	23.8789	32.5028	35.5247	15.6126	17.1917		32.7886		35.3948	29.1897	36.344	38.5289	23.3776	29.6959	24.8483	32.7116	33.5197	24.0083	34.7344	43.8226	34.6121	25.5997	36.9004	28.6802	25.2864	31.7873	31.0439	27.4629
29.4324	40.4507	31.7621	33.3362	26.9583	24.8282	27.3188	29.1902	24.2691	27.4267	38.3468	40.5197	27.9702	33.8369	15.1571	15.0157		39.4305		31.131	34.5311	28.2909	28.0068	27.2879	39.3045	27.0437	33.0493	30.6384	26.4098	30.9872	31.1075	31.8575	28.9204	31.5261	32.326	34.737	35.365	33.5848	27.2667
25.2205	23.386	33.2746	23.5088	19.5924	25.6958	28.3093	35.5027	29.4541	21.5154	38.4078	23.301	20.4173	40.8693	13.4758	10.6177				39.1974	32.6262	27.8248	30.179	25.6356	28.0394	32.1799	36.2259	28.2855	25.504	29.7587	27.9037	31.9639	27.4734	35.2473	31.0163	31.5859	41.7961	31.9134	28.1863
26.8406	38.8461	35.0817	31.2032	38.2097	28.1872	25.7611	28.1346	30.0134	28.906	40.5789	32.0221	34.0053	35.5245	14.5834	10.6177				33.1889	32.6263	24.0426	34.466	28.5361	24.4904	26.1678	30.7387	29.6807	29.0273	27.9037	31.7016	31.7154	33.6857	44.2491	34.569	37.987	39.6739	28.7896	25.5122
23.8969	34.8796	33.9887	40.1757	30.8738	28.907	23.9601	36.5523	29.7118	29.2245	32.222	22.0462	30.8348	22.544	10.8729	10.4149				37.1624	32.0257	32.5071	31.493	24.8508	30.2635	26.1926	33.6845	38.0022	27.2123	29.4647	17.983	29.6527	27.3339	35.9454	29.2289	41.7619	30.8917	42.5918	31.1924
33.4557	27.5496	27.056	32.945	29.2599	28.1872	25.8945	25.4037	25.1936	29.5396	26.055	23.071	24.3698	31.5671	11.8131	14.3941				37.8163	38.2653	27.5414	37.4626	23.2017	29.5316	23.4271	30.508	32.6908	27.0279	36.4127	44.8602	27.9659	31.6969	25.4172	29.0169	40.5528	40.3473	31.9133	28.0193
31.8411	36.1369	24.4349	32.7628	26.9984	39.794	25.8058	30.5407	30.1745	30.4653	31.5962	21.7757	22.0315	36.5545	14.5206	10.6177				40.7061	18.6948	27.5415	41.054	31.5599	35.6495	29.6684	30.7387	31.7496	32.0267	30.3382	23.2873	37.856	34.1743	26.8435	34.0545	40.3067	31.8577	30.6638	20.4952
22.5344	29.4678	35.5995	31.3627	27.078	33.1456	26.9803	29.9572	21.6429	22.8205	30.6912	24.8519	20.6258	30.085	10.6177	14.3941				37.6609	36.8047	34.9125	30.5792	32.2741	34.2818	20.886	39.8866	25.093	20.5984	31.0674	26.1073	32.5247	24.9946	27.9322	34.7728	37.987	37.4916	29.725	30.9116
21.374	36.3832	33.9888	25.2677	34.6583	33.4746	27.3188	37.6396	22.736	35.5166	25.3698	22.446	33.5404	39.7716	10.9289	17.4555				41.3113	34.7947	25.1071	47.6664	23.3776	35.7402	27.5415	25.1382	32.9986	27.4686	30.3381	31.3067	33.6182	33.6855	40.1882	41.2077	36.3127	40.9275	40.6426	29.3297
25.3248	26.433	40.7247	32.4876	45.524	29.8398	25.7613	36.2059	21.643	23.7645	39.8488	25.2542	30.4622	32.5028	9.40002	15.6905				37.0265	23.6087	27.4938	25.7454	26.6802	30.2636	24.9523	24.8149	32.9985	31.9642	29.4646	38.1149	30.4426	32.5696	34.6071	33.9506	35.0222	32.8638	34.6165	26.7449
24.4422	31.4112	35.6957	30.9786	24.9648	38.2135	26.4646	25.6014	25.0281	38.8768	27.1153	29.6182	32.5026	29.5101	12.2188	13.2707				33.1889	29.1897	27.4464	29.7191	33.0816	28.6115	31.9376	25.4178	29.6807	30.2758	29.4646	35.688	31.9639	30.3404	37.8642	36.2635	39.4647	35.2696	32.1878	23.1981
23.6009	28.0712	28.5374	24.9897	29.3703	26.9449	26.4648	40.9747	25.1937	20.2975	23.0408	26.3116	27.507	26.2318	13.2707	13.9644				38.7119	28.1135	31.8979	27.9198	29.4317	37.9832	27.5182	30.6071	34.0327	30.6864	34.6985	36.31	30.0691	27.8878	36.3919	30.673	28.3918	38.8734	37.6463	27.827
28.3373	31.659	30.1361	23.5087	30.6635	35.1123	31.2399	36.2059	33.4838	23.1727	22.7844	28.4963	32.8088	35.645	13.4305	14.2452				34.8239	28.1134	21.2719	29.9635	25.742	34.7515	20.5107	23.8186	27.1922	32.0112	33.5318	40.211	41.8003	31.0054	29.0656	31.8861	34.8442	44.7034	38.3919	24.9539
25.0106	23.9052	26.9291	34.9434	26.474	38.2135	26.8097	33.3802	23.1288	27.4268	29.2811	24.8282	29.5099	30.6023	11.0949	10.5023				31.658	47.4585	28.6585	26.2442	29.5938	33.0296	25.056	24.8555	32.6908	30.0104	31.5835	29.7588	36.1454	38.9844	36.2551	31.0162	29.0844	38.4086	28.1024	31.2996
29.0717	37.352	37.2021	38.2421	34.5647	30.2048	29.1486	28.1346	31.8069	36.5761	31.8922	23.3009	21.3737	30.0848	15.4951	15.1571				30.5899	25.8266	29.1112	25.4603	28.8693	28.7246	20.5108	37.9143	28.9417	21.4784	31.936	30.1325	38.419	38.0912	33.2522	33.8725	31.8995	44.9786	27.8579	30.5841
27.8683	31.9747	33.2746	34.972	38.1249	28.1872	26.9804	27.3163	32.4752	26.9157	22.7844	27.2848	31.7472	37.3275	10.4733	13.2708				38.5284	31.0111	26.3275	29.0854	25.7154	45.9939	33.1312	32.4327	44.997	30.0271	37.3901	27.1354	37.345	30.3824	40.9234	30.8166	30.2994	35.9631	25.2055	27.9952
27.6785	29.7693	24.3881	38.3723	38.4348	22.5134	22.9316	32.6934	28.6431	27.7624	26.2347	31.8736	27.2462	32.2824	8.90058	14.3941				36.5448	29.0721	22.8719	34.372	29.8008	41.8802	41.7718	41.206	35.8513	25.5039	33.1213	23.2873	34.8723	28.7876	34.8218	25.6594	30.1348	34.9819	36.9123	25.5122
32.9261	33.5752	31.7621	35.3126	32.3073	23.1729	26.5081	29.2763	27.5833	33.7798	35.5494	39.2719	32.0605	37.2126	13.8108	12.5873					32.4509	21.0869	30.8167	33.4717	33.7097	28.715	32.4014	31.1989	28.663	31.7406	36.8202	43.7037	29.4447	24.9236	26.1701	31.7039	31.5032	26.894	27.3404
23.7363	30.0307	32.0488	31.7421	39.1849	34.7594	27.3184	25.4036	27.1017	27.4268	30.3449	23.2753	32.5027	32.4589	13.4758	12.6115					38.1456	26.1281	28.2658	32.2451	39.9591	31.8766	30.673	25.265	31.059	28.9536	28.3897	33.0075	29.7032	35.98	31.0162	32.822	27.9935	34.5317	29.8961
23.7995	29.8816	32.0489	25.1489	25.0079	32.6459	25.7613	22.5661	28.4732	34.7257	38.591	19.4767	27.2463	24.6028	10.8449	10.8449					48.3879	23.2628	27.9198	30.6818	31.4456	25.03	30.7386	31.3374	22.0077	25.2353	33.159	37.7065	42.2791	29.9914	27.098	36.8972	42.9093	42.523	29.238
19.706	34.7514	34.523	33.9295	38.1814	30.2048	21.4304	29.9572	26.059	33.6081	23.9407	25.4178	36.3981	35.6449	16.3933	15.6127					29.072	21.1209	26.2441	29.8695	29.3112	26.1678	26.6963	33.9905	30.8814	37.9187	29.4646	43.6261	33.6858	31.9177	31.1013	22.418	45.3021	29.725	38.3866
34.4922	30.0307	34.8199	26.8376	32.3407	33.1456	27.942	27.7739	24.0108	35.5166	38.3162	23.9534	34.7938	31.8819	11.7094	12.1939					35.1539	29.1257	36.6535	31.4731	32.4603	23.6746	29.2926	26.8717	26.5798	26.0119	30.1326	34.6121	30.5079	37.4685	28.1524	31.0697	31.4678	28.8236	30.5841
30.0464	34.8477	25.1726	34.1641	31.3933	31.449	24.4348	26.9447	25.8454	41.0769	38.0701	31.197	30.2269	39.3025	13.6331	17.5426					35.2512	23.2629	27.9488	34.3778	30.9783	28.715	26.2001	40.7883	27.0094	37.2234	35.2675	29.8427	41.7936	39.4076	35.3017	27.9502	35.9945	29.889	28.6117
25.6018	22.4112	40.9489	32.5183	31.152	26.7408	25.7612	33.6809	26.059	28.4215	33.4736	27.2413	34.1728	27.5069	11.177	16.0931					27.2469	24.4881	30.6585	26.9098	32.4604	23.4547	27.2945	32.8231	22.0076	25.675	32.1688	33.1101	31.4544	34.4172	44.5624	31.7572	38.9024	42.1537	23.8821
28.3089	26.0929	24.388	35.0859	30.8738	31.7956	24.4347	27.3164	26.8706	29.2641	45.9793	27.2413	24.1934	27.2463	13.2707	12.8034					21.6398	26.5514	29.6099	29.0344	25.208	26.1925	32.6806	34.6634	26.1817	37.4898	35.2673	30.4426	32.8814	36.9004	41.2719	29.9955	28.8234	34.0471	24.5471
24.8667	29.8816	28.1339	29.7968	32.6064	33.1456		17.1004	25.8184	32.2372	35.6485	29.4173	25.7373	37.4039	13.2707	12.9217					22.7211	33.302	37.592	29.2921	27.9233	21.8847	36.8613	37.5434	22.0303	31.4256	29.3376	37.2238	32.2944	36.2893	34.9498	33.3412	29.4402	31.2634	29.2379
24.8667	37.7976	27.2665	25.1489	32.4406	25.6957		19.3156	23.2185	37.1412	29.6003	34.7218	33.1979	34.8349	14.914	14.3941					29.3458	29.2903	32.853	30.4807	33.0542	30.7398	26.5446	47.5864	27.6683	36.035	33.1214	34.284	32.92	32.4964	40.2235	34.8695	30.746	33.8167	35.968
28.3524	29.4299	34.787	28.2501	31.1519	26.9449		25.1042	21.611	29.2641	40.2301	28.3921	31.1571	35.5247	14.1378	10.1782					29.0328	32.2243	29.0574	30.5925	30.5835	17.989	28.2041	42.6236	25.0885	34.913	32.4767	40.621	41.21	34.0279	34.6453	31.308	29.0949	30.0195	23.3135
33.1762	28.7004	31.7981	26.8747	23.6791	35.1123		24.8012	26.3236	29.5396	27.1585	27.4795	32.5027	31.4308	11.6049	9.78129					31.1214	31.2351	24.5862	33.4921	33.1277	29.1626	38.783	30.0675	24.3395	24.5356	30.461	28.9195	31.6967	29.9083	40.2105	26.2913	34.4646	42.5919	35.2329
34.8134	29.4678	35.5996	29.6962	25.0939	35.539		45.4102	24.7217	28.9059	27.5876	33.6292	32.0605	34.2146	15.1571	12.5145					39.7584	34.5736	33.0985	29.222	29.0332	26.9717	25.4178	30.5913	25.5628	29.9254	36.31	36.0829	34.8759	34.6788	37.4134	33.0167	34.2359	35.728	30.2089
28.8712	21.2349	29.8309	31.3627	29.5167	36.4147		34.9301	29.4542	26.0415	26.7665	23.5036	40.3065	36.398	12.1187	11.7095					29.0721	40.5615	31.8257	24.0689	26.737	24.0004	42.2463	37.7353	31.4115	34.1202	31.1074	27.0622	32.3339	32.4965	31.0162	29.0747	33.6739	32.6101	26.6444
29.5484	31.9397	37.8421	32.9753	39.9479	31.8386		38.1717	30.6305	27.3846	26.1899	24.8279	39.5558	29.5098	12.8745	14.832					33.1472	24.474	33.8252	28.4641	33.3228	19.8695	24.2804	36.6086	22.48	29.0822	31.936	46.6313	44.3685	32.4964	38.529	30.0521	43.4813	28.7896	35.968
26.7362	30.8012	36.6131	32.8539	22.4639	29.8398		34.3478	27.1017	28.0525	32.1855	22.8904	32.5027	40.3065	14.073	12.7078					36.2733	38.8148	30.7904	27.5866	33.6134	21.5869	37.9144	42.6236	21.0312	38.1801	33.7169	31.893	37.4157	42.5604	27.9005	29.825	33.9725	28.8236	32.4573
24.8668	25.5745	29.8307	32.0237	28.2475	27.5482		35.5028	25.9256	22.6167	30.1117	22.0462	34.0053	30.4622	10.2676	12.3429					41.8029	36.595	34.1589	30.8594	24.0226	30.5285	35.5225	36.012	26.9352	36.2758	28.9966	31.9638	31.6966	35.8215	35.4513	25.548	42.9094	26.007	29.3297
35.221	32.3219	26.1094	30.4262	21.026	35.1124		20.7015	24.7496	30.4273	29.1606	23.8788	33.837	32.5028	13.6332	13.8328					35.2837	32.3458	29.2796	31.4731	39.5512	29.1622	29.6692	28.8917	31.9641	31.1316	35.5834	28.7234	36.7624	33.6976	34.2869	25.6366	36.8574	34.5317	32.7863
25.3246	31.3757	37.9327	34.1639	26.0221	30.5205		28.4022	32.0239	29.9675	32.222	20.076	30.4621	33.6677	14.3517	17.8182					33.9641	27.8249	29.2796	28.0775	41.5695	30.3584	36.6691	33.3901	29.01	34.0493	25.2354	34.5794	35.1311	37.4684	38.803	21.2901	37.5812	28.7897	29.0538
34.5664	38.5577	35.0817	26.8003	29.7351	29.6092		38.3692	29.4307	25.8632	27.6301	26.1762	28.3251	36.4763	13.6332	14.8526					30.1141	24.2594	29.3901	33.736	30.5568	26.5605	36.5312	30.6384	26.8423	32.567	36.4125	31.8576	35.456	34.6071	35.8965	26.6126	34.1701	29.8889	31.6196
24.3701	31.6942	33.1713	35.3408	29.5532	29.9772		38.7616	31.346	27.553	37.038	24.852	26.717	33.2838	12.8033	15.0158					33.7957	29.1561	26.8545	29.3154	31.6256	24.6128	40.9849	35.0363	22.0303	31.4531	28.4335	38.6536	38.6559	41.4662	27.3897	35.2734	42.9095	36.6997	25.9038
27.3271	25.7918	34.9183	32.7628	28.2475	25.8552		31.5156	27.7085	27.2151	29.0799	23.9037	33.3269	30.4623	12.8033	10.5023					34.0984	21.2721	33.1232	30.3235	25.3683	29.6683	34.1312	31.1989	24.7472	30.3885	31.7015	34.0193	31.4546	39.5337	35.7734	24.2977	39.6738	35.5911	29.0538
38.4412	34.8797	27.2666	32.6102	27.8631	36.3393		27.1311	31.8068	27.3845	34.2709	26.9348	33.7947	36.5544	16.0742	10.8729					34.465	40.0095	27.0649	29.3154	27.8072	27.4001	26.1229	38.0023	29.7425	33.9147	31.5835	36.3637	30.3824	43.7976	33.6109	24.9194	36.7242	34.0184	37.3591
29.6404	23.3859	41.5313	29.6626	29.5533	29.9771		32.3835	30.8108	35.5167	34.2709	26.2214	33.6677	43.6068	14.3305	14.1378					28.875	29.1561	27.9196	32.999	38.1961	32.3804	34.3376	34.3706	25.4647	31.9148	37.8858	37.5863	34.4714	45.8215	31.2711	22.8559	37.6926	33.8456	24.1059
27.9626	26.4752	32.4743	21.2346	26.5959	31.6227		30.1251	24.7497	26.1746	32.2219	30.1145	28.3251	33.7947	10.6177	11.0398					32.1324	36.344	29.2796	38.5909	28.0394	32.1999	27.9162	35.6897	29.8432	27.0792	37.6222	31.6083	28.7878	39.0276	28.0264	33.612	36.243	33.7878	25.5123
25.3247	41.026	33.5825	33.9295	32.4406	35.3843		20.2085	30.5398	35.0246	25.1372	27.7161	33.9633	31.8818	12.9923	15.6321					27.2469	38.3403	24.3211	31.9257	35.3987	32.2	30.6071	25.2651	27.4686	24.8612	34.9131	28.5656	41.5184	33.6975	33.6371	21.9194	46.4523	33.5847	31.2997
31.5083	32.9037	37.0789	24.7088	35.7607	34.1231		31.4355	22.736	19.8362	38.3468	27.9078	23.4746	37.5182	11.0398	10.6178					34.2655	37.1977	19.8854	23.668	42.9504	34.6027	32.4326	38.7921	29.079	31.1023	34.5908	34.6121	27.287	43.5985	32.8137	23.3706	39.2185	28.7896	26.745
29.6406	31.7646	38.8857	36.3154	30.8737	41.5124		24.1836	28.4976	29.0658	30.6529	24.3459	34.1727	36.5545	12.1938	13.9644					28.2352	19.4747	26.4899	28.4642	29.8049	32.9941	32.1512	30.6384	35.2401	33.9147	34.8418	31.7153	24.4273	32.2327	34.569	24.321	45.1782	29.3944	34.5599
26.144	32.7677	33.2746	25.9301	29.3703	25.8552		27.4085	26.4548	29.2245	31.5963	27.3065	35.805	37.9721	16.4674	10.8449					29.7708	34.5736	34.2773	42.8679	37.0761	29.14	35.7773	35.7302	29.9771	35.8033	29.0821	31.7154	30.3402	36.7993	30.5866	27.1395	29.7437	35.2877	24.1893
36.1808	35.1664	25.7566	32.4876	25.0079	31.9674		26.9448	20.0474	35.0245	29.7585	20.8011	32.5028	40.6942	14.3305	13.0858					28.875	32.7475	26.8545	27.2879	24.721	27.518	29.2926	36.0522	39.826	36.5113	41.6394	30.4054	30.7161	34.893	35.3765	34.674	39.9841	31.4195	25.4333
23.8969	24.0913	31.762	33.5748	32.6064	24.8281		16.2354	29.7817	28.5838	31.559	27.7587	33.7949	33.1979	11.2584	12.5873					26.3953	26.771	25.4925	35.0859	27.8072	28.1689	33.1712	32.6909	32.2912	25.8351	33.2714	29.6146	22.413	32.8008	36.4816	24.5067	33.6738	32.9086	40.5459
29.6404	30.2528	24.388	24.0125	34.2829	28.907		24.8013	33.0463	24.3893	28.1356	28.7654	40.1645		9.87431	12.6115					33.9642	37.3381	22.2689	27.2878	28.0103	24.3219	27.5888	36.6874	30.8976	30.2377	31.1075	36.8576	33.5719	40.984	30.3548	30.8706	33.0003	29.1942	33.5952
35.6179	26.6013	33.5825	36.6435	33.5195	33.7598		29.5335		29.5396	34.578	28.3921	37.5182		12.9217	14.832					28.5168	31.0671	34.5833	30.3909	37.1854	31.9376	30.3754	28.2855	27.523	32.707	42.5846	30.9945	39.5041	41.0144	32.1343	29.9956	39.8152	30.2466	34.7535
26.3116	27.4683	24.9444	31.1072	30.8388	31.6228		29.2763		25.091	26.7665	25.6963	33.7947		17.4555	12.1939					30.6032	38.1694	34.3954	30.5926	29.394	32.1799	32.4637	23.8538	28.3294	25.9763	34.8416	27.6406	28.7878	38.0933	30.5576	27.7588	39.0752	34.0184	35.9868
29.3426	40.2293	30.4381	31.0108	28.9264	32.6459		25.1043		25.8633	34.0303	26.935	28.6759		14.832	12.2188					30.8264	33.3413	36.4763	31.3645	28.2696	31.468	38.2589	30.0675	24.7067	30.3885	31.227	37.1326	28.9202	31.7226	30.8164	24.5759	44.9789	43.7912	23.4569
27.8683	21.392	35.1795	36.8335	41.1446	33.2693		31.9129		26.9587	33.4735	28.9299	27.2462		12.7078	11.7095					33.0092	38.5784	26.2441	24.8509	23.9211	20.8861	37.1885	27.1922	24.7067	32.4826	24.9378	29.6527	27.888	45.7128	25.7966	27.2853	32.898	30.9494	23.3135
19.1176	33.0729	30.8487	38.1377	32.6064	22.9949		24.6993		29.3825	37.6981	30.949	32.5028		14.832	12.4901					26.4385	35.9096	23.3696	23.9834	36.9447	22.6691	26.8094	30.259	26.4099	31.5691	31.4256	26.8946	32.5696	41.9726	34.5433	20.4761	35.5232	37.7759	25.486
33.3768	42.7839	42.4574	29.6962	30.2742	36.7516		29.5335		28.705	32.5123	30.1141	35.4846		16.0742	15.7099					25.8708	26.1281	30.7641	19.9739	26.7372	29.6685	30.4086	33.4764	29.6244	25.7287	34.1202	30.0691	35.1309	29.9498	39.6358	22.2275	41.1464	32.1574	31.6408
26.2448	28.7391	26.8013	32.4876	38.1248	23.0545		29.9572		31.0298	29.7585	38.1076	26.3944		14.2452	12.6115					19.8792	26.6732	33.0986	33.4717	34.282	30.8029	28.771	25.265	30.027	32.735	38.5046	31.393		35.2473	39.8799	27.6975	32.8638	37.6463	27.0443
37.3516	31.9398	40.584	29.6626	35.3055	32.9798		25.6014		28.9059	38.5909	29.4777	38.6059		13.2937	14.9139					31.1214	37.1975	30.3664	35.4925	36.9228	26.2665	30.5079	26.3835	25.6213	24.1901	34.4468	36.2079		32.3988	38.3225	36.4427	40.7626	30.8861	24.3275
28.1818	42.1797	35.3093	26.0452	33.0007	34.4426		38.6312		25.1831	32.1855	29.7183	27.2462		12.3429	13.2937					32.5562	29.1562	27.2142	32.3297	28.8091	36.4783	28.0245	30.2589	29.977	25.8351	33.4577	33.076		38.0451	33.2944	28.1037	40.5694	28.3103	22.041
23.1877	34.0703	27.6001	22.7759	30.9784	23.8718		27.4085		27.7623	26.4575	16.9027	30.227		14.1378	11.7095					25.738	38.9494	28.1797	25.1785	28.7246	25.0301	41.304	25.7184	28.294	27.8777	31.936	28.5656		36.934	33.2147	32.0236	32.9788	32.1574	31.1922
29.1623	33.708	30.2496	27.7513	32.3408	29.8398		17.632		28.0526	30.6529	26.1761	24.0157		13.6331	15.7873					21.4808	30.5149	30.6057	28.4642	26.2476	27.4945	35.5225	27.8741	27.0833	31.453	36.9551	34.0192		42.414	25.7965	30.7234	40.7626	37.7758	30.1421
27.8683	29.9189	31.5815	29.1195	32.6062	33.2694		27.0381		27.9699	34.6798	16.1861	39.8792		13.8329	15.4951					28.235	37.7559	25.6191	28.2957	43.457	25.2618	26.4303	24.3333	26.1816	33.0131	39.4301	43.7037		37.3688	37.2007	30.1086	38.96	27.1471	28.6118
23.8601	30.2528	32.0489	34.8863	29.5533	31.2304		35.9262		25.8632	30.6528	30.5054	23.8964		11.0949	16.4675					37.0522	41.4228	24.221	33.7157	33.2009	31.7343	42.7216	27.8741	29.079	29.5341	37.4896	37.856		42.3555	42.7015	27.7588	39.0751	33.7878	31.8101
21.5785	25.7051	30.2496	24.1782	33.9034	28.5734		31.2747		24.3419	35.5494	24.8283	23.4746		9.13707	15.0765					31.8827	36.8798	21.6788	35.1638	29.394	27.3529	36.8613	35.0363	33.1475	35.2674	23.6582	34.284		37.4684	36.1416	33.426	28.9401	40.9302	28.2101
36.1807	34.8476	36.5821	28.5662	32.6063	28.5734		33.1528		30.1982	26.3686	32.0219	35.2827		9.99693	16.8153					35.2837	34.0015	30.5529	31.4732	34.961	22.5832	24.1971	35.0364	29.7424	23.2653	33.1213	33.1101		41.2559	29.4995	27.1396	28.5102	29.889	28.2815
26.8405	35.5139	32.3685	26.9858	34.9062	29.8396		29.9572		25.8184	33.6484	23.3772	27.2461			13.2937					40.8354	31.8979	24.1875	27.2879	29.8321	26.2665	25.1783	25.265	22.8113	28.9398	26.9512	30.9945		32.4964	31.8859	34.3291	32.0334	32.1574	34.7536
33.1654	45.4407	37.8121	34.8863	29.3703	39.7595		16.1918		22.8711	30.6911	28.8272	39.0105			15.6905					24.3704	33.3019	29.7191	32.916	30.3705	30.5285	31.2921	31.3375	37.0668	27.581	31.4256	43.0524		40.9841	29.1383	31.09	32.3474	35.7281	34.4432
33.7432	30.656	39.4406	38.2421	24.2193	28.907		29.2763		31.9486	34.0302	24.5641	19.2659			11.6049					21.3743	29.1113	30.6585	30.0519	33.054	24.6127	35.636	35.0363	28.6631	31.1022	39.5246	34.8723		30.4436	39.8797	34.1305	37.0093	29.4938	22.2532
28.3682	29.8815	36.5507	30.229	32.3408	33.1456		32.1491		24.3894	36.911	23.9036	27.2462			16.8877					22.6708	27.8249	36.4095	30.8594	34.6349	33.0138	30.1082	25.265	24.7067	29.0345	45.739	41.5834		40.1881	33.9507	36.0204	35.9943	33.1452	34.7536
30.5166	28.7004		28.0374	24.9648	26.6895		36.2059		33.6769	30.6913	30.2714	24.1934			9.93588					23.1198	27.8249	35.5084	34.7534	35.6497	24.9524	33.444	28.489	27.0279	33.8338	29.3377	34.5794		32.8009	33.611	30.2589	28.4708	27.5758	26.4169
25.7378	28.5445		28.6011	24.9647	23.0545		28.4022		28.9459	33.0142	24.852	28.8743			12.5145					37.3285	23.1561	30.2595	33.736	28.0394	29.7772	28.1324	27.8741	31.0107	31.6558	34.6984	34.0856		34.6788	43.8235	29.0747	41.9837	37.9823	25.9037
23.489	31.9398		32.4877	27.4342	23.5249		30.5406		30.6169	28.1773	30.4861	27.7137			15.7873					30.2277	34.3079	37.1148	32.1602	29.0334	26.7789	25.6157	35.6898	31.1556	32.9022	25.4316	36.1142		43.3699	39.4571	28.4045	33.0003	40.6425	34.3066
29.0717	28.5444		32.2719	30.6636	31.4926		10.417		32.2372	26.055	34.8581	33.284			14.8115					33.456	25.2629	25.6192	31.5599	34.3763	35.5438	36.5312	36.7661	25.7188	28.4298	30.4609	36.5806		34.4272	35.6498	25.5703	32.3474	32.6401	24.3275
26.8077	29.9189		22.064	38.2942	24.8833		18.1717		23.8131	33.6136	35.6651	27.0358			15.6127					34.4649	29.7335	33.3182	35.086	34.5881	35.9781	31.5491	34.8711	22.3684	29.1915	30.2971	28.8804		36.562	30.673	29.9767	34.5947	31.944	36.5785
26.8405	35.889		25.4251	39.6771	30.3857		21.183		29.89	28.2607	26.1762	38.864			14.832					39.5567	38.3403	19.2645	39.0659	27.4255	30.123	30.673	30.6384	28.0275	23.0284	35.4433	30.6645		39.1547	29.1684	35.1124	37.4616	30.1171	37.0705
31.2843	32.8698		36.8335	37.6123	32.6038		22.5659		30.5791	35.7472	37.6064	33.1981			14.9139					41.2805	29.7335	28.0355	26.6546	32.4104	29.6029	26.8094	27.8741	31.0753	23.3438	27.5446	26.7682		34.4271	37.2242	33.0682	41.9569	33.3511	29.4893
28.461	28.7003		31.7421	28.8517	36.5648		29.9572		28.5839	27.4168	22.656	27.5069			11.7095					31.45	29.2903	31.493	34.3779	25.7803	21.7362	29.8389	31.3375	32.768	36.5114	31.9359	36.3326		36.6812	37.7889	31.5962	34.8534	29.6262	24.5472
27.8684	32.7678		25.5816	25.0079	35.7311		31.5155		27.4269	24.5223	21.6118	30.4622			14.073					33.9642	27.6836	27.5397	34.0785	28.7246	31.8768	31.7722	28.8917	29.977	29.6576	35.9659	33.2803		29.7417	33.2147	32.428	46.6695	21.3876
30.9456	37.352		25.7758	41.7946	28.5734		26.9447		33.2272	33.4735	26.334	37.4039			8.29827					24.3704	30.7285	31.2087	32.8121	33.7096	23.0372	28.418	27.6661	37.0668	30.0253	31.4256	26.8946		31.7226	30.5574	32.0943	46.5489	34.9537
31.8687	29.4678		32.4876	36.7421	36.3016		38.2376		24.9523	27.2879	23.5542	33.284			11.7095					33.1473	23.3249	31.4416	25.7154	23.3729	28.466	39.4028	31.3375	22.0984	30.8365	40.3961	31.7154		34.6788	26.7375	29.4427	40.2639	31.8827
32.3611	24.0913		32.2411	36.9763	35.4231		31.9131		29.5396	26.2347	27.3064	45.0878			11.7355					23.463	29.1561	30.0445	32.0964	30.7681	25.7942	23.3045	27.4564	26.9166	36.9346	32.3616	30.069		24.9236	29.8565	28.1238	40.4862	26.8939
30.0524	33.0729		28.0374	36.2696	33.4745		31.913		30.6168	26.1		35.1612			17.8353					27.8686	34.8375	29.2796	26.9858	35.5128	29.6028	42.6507	32.4692	22.5688	30.3885	37.9186	28.9195		40.1881	35.9702	36.1618	40.4584	30.8861
27.8682	34.3963		28.601	28.8517	32.1384		32.1491		27.9285	26.4576		35.5247			17.5425					28.7561	34.6114	28.0066	32.9161	25.7488	21.6169	39.8866	29.7293	27.8125	36.3356	35.9658	31.8576		35.1386	30.5865	29.8251	34.5948	36.9121
37.4924	30.8013		31.5845	36.0011	31.9675		33.7556		38.9957			24.0156			19.764					27.7865	32.3862	26.7639	34.0384	31.8298	32.1798	28.418	32.0664	27.0833	29.7807	35.2674	31.8576		41.2559	27.9319	35.193	37.9084	39.3971
30.2855	31.9398		41.567	42.3585	36.3393		23.1178		29.5396			37.1742			14.8525					36.8047	40.5613	27.2142	29.5707	26.2167	24.3484	35.7774	32.6908	24.0915	28.3977	26.8588	24.4745		41.256	27.3895	29.5771	35.9945	36.9122
32.7388	33.0053		33.9295	38.1249	23.0544		33.681					20.9009			14.3517					22.7211	33.3413	25.011	25.8744	40.7623	30.6343	26.9971	27.8741	27.3224	29.7807	31.5441	36.0829		39.4392	32.1343	37.5001	46.1614	37.7758
22.5735	31.659		29.0853	36.7423	28.3326		35.9963					30.4153			14.8525					25.8266	33.7699	30.974	28.8692	35.6723	28.4434	39.3002	35.7302	27.4687	37.8636	25.868	41.4745		35.4231	30.5867	37.4396	27.873	32.6402
26.8077	28.7392		28.5661	32.2071	32.9799		31.7546					25.4023			16.3001					22.4684	29.6894	23.4043	28.6555	38.9524	25.056	32.0568	32.0664	25.0086	29.5341	31.3067	35.7367		26.7508	40.6471	33.0167	30.3046	25.2053
30.9171	33.4087		26.8746	30.8388	31.449		33.6809					44.2246			14.0731					31.5586	32.1022	34.7467	25.742	35.8762	27.4002	33.2624	35.7302	26.0282	29.6576	30.6239	39.4638		42.5602	31.9966	34.674	36.4901	34.0472
31.5081	30.2528		25.9686	25.2653	31.6228		20.0834					41.2517			14.6668					26.7819	43.995	22.7727	32.8121	40.2017	30.0586	32.804	31.931	22.6794	36.411	29.9254	32.3854			29.259	37.2576	31.5034	35.6459
30.8318	39.3031		21.375	39.4044	28.3327		30.5405					25.346			15.6126					29.694	38.0664	29.2796	32.4983	30.5833	27.3291	40.0382	39.7525	32.3995	27.7463	41.49	30.1066			29.2592	34.6576	43.5586	25.3215
31.0306	34.0703		31.0751	39.7585	28.1872							31.0653			15.1571					29.3458	37.1976	29.0573	33.492	37.597	29.0066		30.0675	32.0268	33.5897	35.0198	30.069			37.7889	34.6577	40.3195	41.5699
27.0363	31.3757		35.65	38.0966	28.1386							32.5027			15.3767					31.4499	25.8766	31.2087	29.8008	36.9228	35.7254		44.6102	20.4032	37.8877	32.5149	37.1326			31.8861	31.4524	29.8787	35.8374
27.5832	26.9349		25.2676	31.2211	28.5734							37.0974			13.2937					23.463	23.8789	27.2439	32.9368	33.3228	27.3529		32.9986	25.2476	32.707	39.7129	31.7154			25.3827	37.2576	34.5947	30.6955
23.8969	24.0912		21.2346	30.9784	31.2305							42.7474			17.6119					29.694	27.4939	23.0553	28.9165	28.2695	30.6343		32.5794	23.0298	21.1664	30.6239	29.1918			36.2632	32.4979	41.9837	33.8168
23.1499	37.352		26.3877	33.8077	33.2693							19.7056			15.8066					28.7561	25.5715	32.0542	31.5815	33.1031	35.0487		31.3998	22.2114	32.9022	34.1203	26.8946			37.2244	28.1037	34.5947	40.7626
30.6029	29.43		37.6108	29.3703	26.1711							36.1224			11.9414					27.2469	25.3146	31.8257	29.8695	33.2009	27.1392		28.6852	26.9351	30.3886	38.6655	32.4551			28.4019	27.6975	43.6874	40.7626
37.9583	27.0589		34.1347	33.8078	31.0986							35.645								31.158	36.4877	29.0295	36.2542	29.0334	30.2301		37.963	30.4243	23.2654	30.3382	30.9945			31.1298	24.5067	34.2358	37.5163
27.9627	26.1357		31.3627	25.1369	32.1384							30.085								31.0111		27.422	35.3768	34.7516	36.567		30.9705	32.0268	39.7715	39.7129	24.2425			26.9019	25.5924	44.0966	39.5456
27.3272	29.5813		26.8376	35.5187	23.525							30.4622								35.2837		37.0054	23.6681	27.9235	23.4273		29.8089	29.2848	25.8351	26.859	40.843			31.4963	34.7556	38.1612	37.5577
26.8405	40.2293		25.4643	33.8078	31.4055							37.1742								35.2837		29.0295	29.8007	27.3367	31.0748		27.648	29.8432	38.7232	31.5441	26.5988			35.1763	34.2796	38.96	36.2981
36.6632	35.1665		28.8096	34.062	32.1383							35.2828								33.2848		30.6058	28.8693	28.0105	31.303		33.5005	29.165	33.4533	38.9541	32.9733			29.7082	32.0237	32.3474	33.5846
26.8405	34.3963		27.4258	24.3083	34.7594							29.8946								35.9253		33.3184	35.7801	35.3755	19.9021		34.2194	31.9642	33.3986	31.7016	36.3948			32.5708	42.8586	39.472	31.8827
26.3116	33.1739		30.4918	27.8631	30.7888							35.2827								31.1213		28.2658	25.6355	29.0612	38.7497		31.5545	28.0276	27.0454	31.5441	30.8483			31.1016	27.7588	35.365	30.6639
25.7377	35.4195		27.1333	28.9637	24.6065							27.2987								30.1142		28.6077	27.8822	27.9234	30.7188		28.1282	30.027	27.5811	25.2352	37.7064			27.932	30.4827	36.2431	26.8939
39.8549	38.8748		28.5661	28.8517	34.0829							29.5581								24.6036		31.8512	34.1386	37.7048	26.779		27.2935	31.0268	23.0283	34.6984	35.863			40.0568	33.612	34.5947	35.6459
27.5831	32.8698		30.8495	37.44	26.7407							45.4976								27.8685		30.7905	35.1638	23.7853	28.7825		34.0769	25.0086	39.5871	31.3066	31.7154			35.1761	32.4455	39.472	36.3519
33.3768	26.9349		28.2502	33.0008	30.3857							34.2145								35.3807		23.0555	32.0964	26.2477	31.8768		34.0768	25.6214	33.9148	24.1264	31.6083			43.2559	28.7612	29.0846	40.7148
34.388	38.8461		26.6511	28.8518	44.7213							30.8348								31.7391		25.0755	32.9989	38.3865	25.7941		33.7538	25.6214	30.0253	28.0815	34.7099			42.9281	30.9988	41.7961	33.6718
31.5083	34.7514		24.3016	31.7688	26.7408							35.8447								38.5329		32.2305	33.4309	38.7228	28.2606		38.5358	29.6244	30.0253	36.9213	27.7223			36.0927	37.1815	37.5812	44.8281
29.1924	35.9201		36.6436	29.7351	39.7251							30.4621								30.2277		30.7904	28.9166	35.4673	28.4432		31.593	27.2122	25.8351	29.9255	36.1142			27.6461	31.3079	31.2889	43.4102
35.8881	31.7646		32.9451	35.0295	29.9772							35.4844								27.2468		29.8006	29.8695	36.9445	35.7073		23.195	29.2847	35.5727	39.0499	31.6083			32.8138	34.6577		42.5231
34.6933	28.5444		36.1778	37.1509	23.0544							24.9487								28.5168		26.49	32.3298	33.0296	35.3246		29.8089	30.027	32.6791	35.4432	32.9733			32.8136	28.8203		40.7148
30.5168	32.8697		30.4918	42.587	34.5619							39.0106								25.0179		44.7011	39.6905	28.0393	28.1688		32.5794	25.5628	32.4827	31.5441	28.6051			34.9498	33.0682		28.5168
30.9456	29.8816		36.7251	38.7699	27.1475							45.6542								35.5738		25.7768	28.0532	36.459	23.8922		27.7798	26.009	29.8727	33.1587	26.2997			32.1618	23.2491		30.791
34.5663	34.1357		33.9589	36.8302	21.7709							27.2461								33.5583		29.0297	27.784	31.3165	23.9194		29.9718	30.0936	32.93	38.1148	29.0365			33.2412	32.3756		37.7758
39.855	44.8224			31.5304	27.1474							33.2839								37.0521		30.3664	27.7102	37.4674	29.6684		40.567	30.0104	29.5341	38.3751	29.1917			29.8564	33.0167		31.8827
25.0107	38.8748			28.9263	25.8552							26.7171								30.3785		25.2046	29.4317	28.6115	28.7824		35.5797	23.862	41.4819	21.1603	33.2803			36.5542	35.2574		31.2635
27.8684				36.2695	25.3199							37.2125								25.6936		29.9635	30.391	33.1032	24.1884		39.0067	32.768	29.7807	39.4301	35.0663			32.4351	32.428		33.6138
25.3248				26.474	28.5734							19.7055								27.8686		33.0986	29.8008	31.83	31.6118		23.7654	18.3639	25.9763	36.2758	40.621			31.1016	26.6976		38.4682
35.0209				35.2443	27.5482							30.227								31.8827		25.0111	27.5867	27.0086	28.4432		31.2054	30.077	37.9601	42.5846	34.284			30.9879	29.8251		28.5168
41.2842				30.6635	24.8281							25.1198								25.8266		29.0853	29.9608	29.2835	31.2409		39.7792	32.3223	31.3657	25.6751	30.8483			42.2233	22.3545		40.5462
22.0618				32.2405	36.6397							32.6343								32.6962		33.0988	40.8273	25.5908	28.7151		37.0873	23.3533	37.9601	31.8971	35.3871			44.1643	35.1285		35.0655
25.2204				26.4333	28.907							33.2839								30.2655		29.3073	31.5598	27.9232	35.7255		28.4723	21.9393	36.411	40.211	30.0691			36.1418	29.4427		34.0471
24.3701				37.0637	21.3803							31.4309								33.5582		26.8546	39.2925	32.4603	33.0726		34.0768	21.197	38.4626	37.9187	28.7234			41.1863	34.064		31.6983
20.6209				29.5533	38.1059							29.51								31.011		24.0192	38.9257	33.2009	25.4404		32.1658	28.3117	32.5108	29.4647	31.893			34.6455	28.7613		30.1819
28.1817				39.6771	34.5618							38.9007								28.6766		33.0496	31.5815	28.2695	25.4404		33.6092	23.4175	36.5364	36.4126	24.6585			26.5718	24.2744		24.7753
24.7635				38.1814	29.8398							35.6449								39.4121		31.4414	33.061	33.0542	29.0065		35.2013	26.0281	23.3438	41.0074	33.6183			40.2103	29.4427		31.5436
23.8969				33.7759	38.1058							40.5889								31.158		29.6918	27.3878	29.9675	28.0998		27.6481		25.6932	36.4127	27.6407			33.6109	23.3463		36.593
25.6009				37.7554	28.9069							33.9633								24.6036		26.2441	38.8555	27.0085	33.0725		22.0655		26.8418	32.5149	29.6146			30.5578	38.6899		29.6591
29.1924				29.5533	41.3803							31.0194								33.5583		25.7766	25.7419	29.394	30.1231		38.7563		30.3885	42.321	25.691			40.56	26.4417		39.5457
37.328				32.6063	29.7937							30.4621								27.7454		27.9485	29.2221	31.523	29.1621		28.2578		35.185	37.8529	39.0029			32.1615	34.0641		40.5464
30.6029				36.713	34.7989							29.5099								27.8686		27.005	25.8214	32.7339	30.7187		28.2576		31.1316	36.0002	37.5863			24.0619	35.2413		26.7116
30.2275				35.7607	29.2837							32.8087								34.4649		28.2657	27.3628	34.2821	29.5153		23.611		33.8068	31.5441	32.9733			29.7083	30.8889		38.9479
32.361				33.8077	40.0343							27.9701								27.2469		26.2441	32.5614	31.4456	32.0589		30.8917		31.1316	31.9359	28.8804			33.6371	26.3559		35.7281
31.2				26.9983	34.1231							23.6562								26.3952		24.7177	29.5013	28.1258			31.8234		29.7807	43.6234	30.958			39.0975	31.9528		28.8236
30.2273				21.5359	28.9069							32.5027								30.8263		28.4656	29.5706	32.8574			34.8887		25.8351	35.9658	33.0759			34.2869	25.9005		32.1575
28.9506				30.8737	39.4829							38.2344								33.1817		41.4664	31.9043	29.394			25.7326		32.5108	28.0813	36.1454			30.8164	28.6626		30.0196
25.3249				32.4405	34.123							30.0848								26.9094		25.5875	38.9082	31.9062			24.2721		32.0576	38.9541	29.7668			31.8863	27.3683		29.494
37.726				31.2211	31.6228							28.8743								29.3459		31.8257	36.2919	32.0584			33.0616		21.6363	31.1074	34.9694			31.4963	27.7588		43.5451
25.3249				30.5578	38.2135							26.7171								30.6032		24.5862	37.1477	35.3069			27.2936		32.4826	38.1801	30.4426			39.9462	24.4835		32.4298
26.5112				38.6306	28.2843							34.2145								33.7956		29.0852	26.6803	36.9227			27.2936		25.1537	36.2758	36.3326			34.4924	37.0746		31.6982
30.0525				29.3703								28.9237								29.1897		28.6077	33.0817	30.557			30.9706		35.701	33.7537	29.6146			43.9842	39.444		32.1574
29.994				30.6635								32.8088								30.5659		23.4734	30.6818	28.0393			34.3614		35.9307	28.3896	27.1039			30.9023	30.4827		41.7108
28.3682				36.7422								32.0605								35.9252		23.4734	27.3878	30.8209			28.1282		24.9347	34.0472	36.3637			38.7346	32.5675		45.9904
36.1807				24.6168								33.3268								27.0365		32.6303	29.8008	34.3761			31.2444		37.5727	31.5835	41.8003			36.9146	35.3857		36.3787
38.6464				26.474								32.105										26.1203	29.2455	28.0394			35.5797		26.2563	34.0472	41.7733			43.5204	25.0554		31.4194
31.4245				40.8289								29.5583										28.8615	38.9258	31.0042			34.0768		28.139	36.4127	36.2079			27.3897	26.6125		27.9979
30.917				32.507								31.567										25.108	34.7534	30.2636			30.1338		31.1023	39.4302	32.2805			42.598	24.7597		40.7627
29.1923				36.7129								35.5246										26.4901	34.1386	32.5351			33.6816		28.139	33.9743	43.8328			35.0757	25.3923		34.9537
31.8496				35.2444																		29.3073	32.3297	32.2096			20.5222		36.9098	33.2714	36.1142			36.5542	29.4427		33.6137
31.8686				35.3666																		29.2794	31.797	33.4199			32.1658		31.8286	33.5319	30.0691			33.4532	33.426		42.3158
34.9958				29.5168																		29.7191	31.754	29.0333			30.7734		27.8777	34.6986	27.1039			39.5018	22.4557		37.1497
26.1442				28.5134																		34.2773	34.7534	34.2582			27.648		32.7071	37.9842	41.0638			37.5078	31.326		30.7909
34.87				32.3073																		28.4659		30.7946			31.2444		31.2196	29.9255	27.7223			27.9005	30.9439		39.3722
32.9262				33.9033																		30.5792		36.7247			23.195		29.9338	31.2271	33.6182			32.1343	23.803		40.7626
32.2794				35.7305																		23.4733		34.4705			27.2936		34.4763	40.9467	40.6211			40.0566	30.0522		41.9679
29.4323				27.9404																		20.7233		32.4604			40.567		28.5261	33.2711	31.5725			27.3895	29.9956		40.1389
33.8731				29.1492																		29.0575		26.2477			37.5115		24.3784	34.6986	29.6528			37.4134	31.326		35.9905
33.5343				33.1313																		28.8615		23.4074			35.0627		37.8636	34.4466	29.8427			33.8726	30.1087		33.1453
28.1818				27.9404																		24.7177		35.3069			34.4675		37.8878	30.2972	34.7099			33.2944	37.2576		37.776
34.87				33.2935																		26.1203		32.6098			27.2489		32.1431	32.5149	43.6001			31.2713	28.7612		39.1481
27.6785				32.3407																		29.3899		24.7211			34.2194		26.8418	38.375	41.2834			31.1298	27.7588		37.75
28.6762				36.2696																		28.4659		36.6583			30.2949		32.9021	28.4334	29.1918			37.2953	25.9878		40.0368
34.4134				32.4405																		33.488		29.9677			32.4671		29.6576	33.7537	36.0829			27.3574	31.0353		30.7593
24.6569				31.6327																		32.054		24.1572			29.6451		22.3841	33.717	28.7234			28.1838			40.5705
33.3766				33.8077																		20.1285		25.9683			35.8862		28.2363	33.7537	32.8359			37.5782			43.7019
32.061				32.2406																		23.4735		25.6227			40.9552		26.671	45.1643	39.2053			29.1383			30.8861
31.4244				29.952																		28.8054		31.83			28.1282		36.736	32.8195	42.0967			38.2535			27.9979
29.7882				26.0222																		25.4605		30.6627			29.809		31.9147	41.4898				30.2966			31.2636
28.3682				28.2093																		26.8546		28.4696			29.3148		28.4299	41.1285				34.4921			40.7626
33.3768				37.7553																		27.9198		27.9233			31.0881		34.4763	41.0072				35.7735			33.6137
28.6761				25.3341																		23.4043		21.607			36.3914		24.0765	36.2758				35.8719			41.9444
27.3271				38.2096																		30.579		25.7803			36.1902		24.1901	35.0196				29.4993			32.2788
35.0958				35.3665																		35.6676		27.9235			28.6427		32.5108	28.9965				38.7348			36.0819
30.5166				36.7422																		35.302		31.8555			29.809		30.3885	41.0073				29.3496			32.2788
27.9627				21.7689																		28.1221		32.4604			29.4391		31.3657	35.6882				28.7419			38.3919
39.9652				37.4399																		24.454		28.8092			29.6862		24.3784	26.8589				21.628			30.791
35.6672				35.3055																		25.7768		26.2477			32.7657		33.9148	30.1326				29.4095			34.0472
30.8316				33.2287																		28.8615		37.1852			35.648		32.567	31.0675				28.6185			32.1879
28.615				32.837																		36.4538		35.8536			26.5246		33.9148	41.0377				35.7734			31.9133
29.1925				30.5578																		28.6077		30.2635			23.1951		31.6847	35.7577				29.1382			30.2466
29.0716				31.3933																		32.054		27.0086			33.1718		35.7266	38.6658				29.3496			39.7674
37.9583																						26.7336		36.1912			29.6452		27.581	33.864				24.4979			42.1537
26.8406																						21.9758		29.0333			26.6619		24.8244					31.9138			37.9823
29.1924																						27.9196		23.3729			33.0983		37.8877					29.1381			37.0179
30.5167																						24.4873		27.4254			30.9705		28.139					29.2291			37.7759
30.2274																						26.2441		30.0487			35.9201		39.7944					27.6463			37.7501
26.1441																						23.4734		33.2009			34.3614		29.7807					40.4076			40.5464
31.4245																						36.0066		31.8298			31.3998		32.567					31.0161			34.3899
30.9171																						30.5527		30.6626			38.2506		36.5364					42.5148			40.5463
23.1879																						31.8512		29.7232			30.295		32.735					35.0757			36.6998
29.4323																						31.8257		40.6228			28.77		33.3987					39.9683			39.7427
30.9454																						36.029		28.8653			26.6619		31.9147					43.8434			35.0654
26.6435																						26.9748		28.4695			28.1282		32.7071					35.7734			25.0109
30.9455																						28.2658		23.6829			36.5249							30.5574			36.3518
34.4646																						27.9197		30.7946			28.2576							35.8966			47.5576
32.8192																						22.5222		29.832			39.0068							34.9496			44.7626
28.6761																						27.0649		31.0044			30.8918							30.8164			44.7626
32.7389																						24.4872		20.5298			30.9706							29.2591			36.352
23.601																						28.0356		38.2172			26.5246							35.1762			32.7298
26.3116																						23.918		30.7946			34.3259							29.7083			43.545
33.9766																						22.7726		29.2837			29.1482							26.1024			33.6139
27.295																						24.4871		33.42			40.6868							30.9876			41.9444
34.87																						20.5663		26.2167			32.914							34.5435			36.3788
30.2563																						36.9177		33.1031			37.738							35.0758			43.9028
33.1391																						34.3952		29.3113			34.3258							32.1342			29.1943
30.0525																						43.8963		31.4456			29.6861							39.8799			28.2758
29.1924																						29.3899		34.2109			39.7792							26.2036			41.9445
30.4878																						27.2441		28.4695			36.0216							39.4444			39.7921
34.2087																						28.0355		20.5299			35.8862							36.0929			33.1452
37.7028																						23.2303		30.7681			31.8234							35.8965			40.7627
24.1892																						36.9396		35.6495			42.587							35.8965			34.9536
27.8682																						33.0252		29.8319			31.2444							33.2148			39.988
29.0719																						36.7416		30.0487			35.6481							30.6727			44.5876
32.0883																						27.0049		32.61			34.2194							28.6187			30.0195
28.3681																						24.7177		28.8655			37.7379							32.8137			34.5318
27.9626																						30.2597		33.3227			40.8362							34.0544			35.3706
33.9768																						29.2798		30.6626			34.0768							37.0101			22.7602
31.8134																						27.9196		36.6583			36.525							29.4995			25.3215
31.0588																						30.8169		25.1114			35.5796							39.8799			31.9134
33.7952																						23.6797		32.0583			26.8439							36.2634			28.3104
29.3425																						25.6191		37.0104			34.3614							31.9416			28.3104
29.6403																						29.5277		27.9234			35.5796							43.8636			32.1878
30.2855																						25.9647		22.6686			37.963							37.995			42.1537
																						27.0649		29.832			37.995							31.9415			38.3919
																								44.5802			33.6093							36.5542			40.5463
																								25.6226			30.0124							36.2635			34.9537
																								33.2009			42.0116							36.4819			33.5847
																								28.2695			33.6816							36.747			35.0653
																								35.8762			35.8862							38.5519			35.6459
																								38.7226			32.7657							41.5065			29.4939
																								37.7048			23.8165							42.5151			27.9979
																								25.7804			43.5201							39.5019			36.593
																								31.0045			32.8028							33.2412			31.4194
																								38.3019			43.1549										36.4592
																								30.2633			36.1902										36.2981
																								41.7057			29.3148										32.6101
																								35.6723			39.2866										31.9133
																								31.8555			45.6762										40.9302
																								33.1277			33.0615										34.9817
																								28.8654			31.5931										35.3707
																											24.4221										31.5437
																											35.648										38.6709
																											40.5671										38.0338
																											29.0227										34.5884
																											28.4722										28.2758
																											28.1282										31.044
																											32.914										28.1372
																											35.6138										28.3103
																											34.6436										40.9301
																											27.604										32.7299
																											35.648										36.9122
																											31.3611										33.6719
																											28.77										33.6719
																											32.8028										31.6365
																											37.7702										33.1453
																											35.9201										31.4195
																											36.1902										36.593
																											31.5931										39.3722
																											36.9886										29.7252
																											37.5114										28.3104
																											25.3993										32.2788
																											33.3548										30.0195
																											32.7656										29.494
																											30.9705										30.6637
																											31.2054										39.2479
																											28.6852										38.948
																											25.9681										36.298
																											31.3611										26.8939
																											36.3915
																											26.4786
																											28.4723
																											25.1586
																											26.7076
																											32.5794
																											39.2866
																											30.7337
																											28.77
																											33.3913
																											33.0617
																											31.361
																											27.648
																											31.3611
																											25.1587
																											29.0228
																											34.3614
																											31.3611
																											26.5245
																											32.5795
																											34.0768
																											35.9201
																											27.648
																											28.1281
																											30.2949
																											40.1145
																											26.662
																											33.6092
																											42.1561
																											29.9718
																											30.295
																											33.3548
																											32.8028
																											35.0627
																											37.4464
																											34.4675
																											37.4465
																											31.8234
																											26.5246
																											39.0068
																											28.77
																											39.1314
																											26.6619
																											37.7379
																											34.6436
																											28.1282
																											29.0227
																											33.6092
																											35.0626
																											36.0217
																											29.0226
																											40.4769
																											39.4721
																											29.6862
																											37.5763
																											35.8863
