# Supplementary material for: Ultrastructural sublaminar-specific diversity of excitatory synaptic boutons in layer 1 of the adult human temporal lobe neocortex
Source: eLife. 2025 Jul 21;13:RP99473. doi: 10.7554/eLife.99473 (PMC12279374; doi:10.7554/eLife.99473)
Supplement: Source data 4. [file elife-99473-data4.xlsx]

## Sheet: 01_Volumetric_Analysis
Quantitative analysis of the volumetric proportion of astrocytic processes in L1a and L1b of the human TLN
Hu_01_L1a	Slice 01	all squares	342			Hu_01_L1b	Slice 01	all squares	324
		skipped squares	32					skipped squares	10
		squares analyzed	310					squares analyzed	314
		astrocytic processes	98					astrocytic processes	14
		no astrocytic processes	212					no astrocytic processes	300
	Slice 02	all squares	400				Slice 02	all squares	324
		skipped squares	62					skipped squares	17
		squares analyzed	338					squares analyzed	307
		astrocytic processes	57					astrocytic processes	47
		no astrocytic processes	281					no astrocytic processes	260
	Slice 03	all squares	399				Slice 03	all squares	324
		skipped squares	78					skipped squares	35
		squares analyzed	321					squares analyzed	289
		astrocytic processes	90					astrocytic processes	48
		no astrocytic processes	231					no astrocytic processes	241
Hu_02_L1a	Slice 01	all squares	400			Hu_02_L1b	Slice 01	all squares	342
		skipped squares	76					skipped squares	72
		squares analyzed	324					squares analyzed	270
		astrocytic processes	98					astrocytic processes	100
		no astrocytic processes	226					no astrocytic processes	170
	Slice 02	all squares	323				Slice 02	all squares	360
		skipped squares						skipped squares	129
		squares analyzed	323					squares analyzed	231
		astrocytic processes	100					astrocytic processes	45
		no astrocytic processes	223					no astrocytic processes	186
	Slice 03	all squares	342				Slice 03	all squares	342
		skipped squares						skipped squares	58
		squares analyzed	342					squares analyzed	284
		astrocytic processes	131					astrocytic processes	35
		no astrocytic processes	211					no astrocytic processes	249
Hu_03_L1a	Slice 01	all squares	342			Hu_04_L1b	Slice 01	all squares	289
		skipped squares	19					skipped squares	0
		squares analyzed	323					squares analyzed	289
		astrocytic processes	82					astrocytic processes	61
		no astrocytic processes	241					no astrocytic processes	228
	Slice 02	all squares	306				Slice 02	all squares	306
		skipped squares	18					skipped squares	0
		squares analyzed	288					squares analyzed	306
		astrocytic processes	84					astrocytic processes	64
		no astrocytic processes	204					no astrocytic processes	242
	Slice 03	all squares	306				Slice 03	all squares	306
		skipped squares	0					skipped squares	19
		squares analyzed	306					squares analyzed	287
		astrocytic processes	64					astrocytic processes	56
		no astrocytic processes	242					no astrocytic processes	231

## Sheet: 02_Single_AZ_Analysis
Quantitative analysis of the astrocytic coverage of AZs in L1 an L4 of the human TLN
L1a												L1b													L4
Spine						Shaft						Spine						Shaft							Spine						Shaft
Patient	Bouton No		Astrocytic processes			Patient	Bouton No		Astrocytic processes			Patient	Bouton No		Astrocytic processes			Patient	Bouton No		Astrocytic processes				Patient	Bouton No		Astrocytic processes			Patient	Bouton No		Astrocytic processes
		Target	both sides	one side	without			Target	both sides	one side	without			Target	both sides	one side	without			Target	both sides	one side	without				Target	both sides	one side	without			Target	both sides	one side	without
Hu_01	01	spine	x			Hu_01	03	shaft			x	Hu_01	01	spine		x		Hu_01	05	shaft			x		Hu_05	01	spine	x			Hu_05	02	shaft		x
	02	spine			x		05	shaft			x		02	spine		x			34	shaft			x			03	spine	x				05	shaft	x
	04	spine	x				07	shaft			x		03	spine			x		42	shaft			x			04	spine	x				06	shaft
	08	spine			x		09	shaft			x		04	spine			x		43	shaft			x			09	spine			x		07	shaft	x
	10	spine			x		13	shaft			x		06	spine			x		52	shaft			x			10	spine			x		08	shaft	x
	11	spine		x			17	shaft			x		07	spine			x		55	shaft			x			12	spine		x			11	shaft			x
	12	spine			x		19	shaft	x				08	spine			x		59	shaft	x					13	spine		x			15	shaft	x
	14	spine		x			20	shaft			x		09	spine			x		65	shaft		x				14	spine	x				16	shaft			x
	15	spine			x		30	shaft			x		10	spine			x		66	shaft		x				18	spine	x				17	shaft			x
	16	spine		x			70	shaft			x		11	spine			x									19	spine			x		20_1	shaft			x
	18	spine	x										12	spine		x		Hu_02	04	shaft		x				20_2	spine		x			38	shaft			x
	21	spine			x	Hu_02	10	shaft			x		14	spine			x		05	shaft			x			21	spine			x		47	shaft		x
	23	spine			x		11	shaft			x		15	spine			x		07	shaft	x					22	spine	x				51	shaft			x
	24	spine	x				18	shaft			x		16	spine		x			12	shaft			x			23	spine	x
	25	spine			x		20	shaft			x		18	spine			x		14	shaft			x			24	spine	x			Hu_06	01	shaft		x
	26	spine			x		24_2	shaft			x		19	spine		x			16	shaft			x			25	spine	x				04	shaft		x
	31	spine	x				30	shaft			x		20	spine			x		29	shaft		x				26	spine		x			05	shaft		x
	32	spine	x				31	shaft			x		22	spine			x		32	shaft			x			27	spine		x			10	shaft		x
	33	spine			x		33	shaft		x			23	spine			x		44	shaft			x			28	spine		x			18	shaft	x
	35	spine		x			37	shaft			x		24	spine		x			45	shaft		x				29	spine			x
	36	spine		x			39	shaft			x		25	spine			x		46	shaft			x			33	spine	x			Hu_07	09	shaft	x
	38	spine			x		56	shaft			x		26	spine			x									34	spine	x				11	shaft		x
	40	spine	x				60	shaft			x		28	spine			x	Hu_04	02	shaft			x			35	spine			x		12	shaft	x
	41	spine		x			67	shaft		x			30	spine			x		04	shaft			x			36	spine		x			19	shaft		x
	42	spine			x		80	shaft			x		31	spine			x		06	shaft		x				37	spine			x		20	shaft		x
	43	spine		x			81	shaft			x		32	spine			x		07	shaft			x			39	spine	x				25	shaft	x
	45	spine		x			88	shaft	x				38	spine			x		08	shaft			x			41	spine	x				26	shaft	x
	46	spine		x			91	shaft			x		39	spine			x		09	shaft			x			42	spine	x
	47	spine		x			94	shaft			x		40	spine			x		10	shaft			x			43	spine	x			Hu_08	06	shaft		x
	48	spine			x		98	shaft			x		41	spine			x		18	shaft		x				44	spine	x				07	shaft		x
	49	spine		x									44	spine		x			24	shaft			x			45	spine		x			08	shaft				x
	50	spine			x	Hu_03	04	shaft			x		45	spine			x		26	shaft		x				46	spine		x			09	shaft				x
	51	spine	x				05	shaft			x		46	spine			x		27	shaft			x			48	spine			x		10	shaft		x
	54	spine		x			35	shaft		x			47	spine			x		31	shaft			x			49	spine			x		11	shaft				x
	55	spine			x		40	shaft			x		49	spine			x		32	shaft			x			50	spine		x			14	shaft		x
	56	spine	x				48	shaft			x		50	spine			x		36	shaft			x			52	spine			x		19	shaft		x
	57	spine	x				49	shaft			x		51	spine			x		37	shaft			x			53	spine		x			18	shaft				x
	58	spine			x		58	shaft			x		53	spine			x		38	shaft		x										21	shaft		x
	59	spine			x		60	shaft			x		54	spine			x		42	shaft			x		Hu_06	02	spine	x				22	shaft		x
	60	spine		x			61	shaft			x		56_1	spine			x		43	shaft		x				03	spine	x
	61	spine			x		63	shaft			x		56_2	spine		x			46	shaft			x			06	spine		x		Hu_09	10	shaft			x
	62	spine		x			64	shaft	x				57	spine			x		58_2	shaft		x				12	spine			x		13	shaft		x
	63	spine			x		65	shaft			x		58	spine			x		60	shaft		x				19	spine			x		14	shaft		x
	64	spine		x			68	shaft	x				61	spine			x		64	shaft		x				24	spine			x		16	shaft		x
	66	spine	x				69	shaft	x				62	spine			x		65	shaft			x			25	spine	x				18	shaft		x
	67	spine	x				70	shaft			x		63	spine		x			66	shaft			x									20	shaft		x
	68	spine			x		73	shaft			x		67	spine		x									Hu_07	01	spine	x
	69	spine			x		77_1	shaft			x		69	spine		x										02	spine	x
							79	shaft			x		70	spine			x									03	spine	x
Hu_02	02	spine		x			80	shaft			x		71	spine		x										04	spine		x
	03	spine			x								72	spine		x										05	spine	x
	09	spine			x								73	spine			x									06	spine	x
	12	spine	x										74	spine			x									07	spine	x
	13	spine			x								76	spine		x										08	spine	x
	14	spine			x								78	spine			x									10	spine			x
	15_1	spine		x									79	spine	x											13	spine	x
	15_2	spine		x									80	spine			x									14	spine	x
	16	spine			x								81	spine	x											15	spine			x
	17	spine		x									82	spine			x									16	spine		x
	21	spine			x																					17	spine	x
	22	spine			x							Hu_02	02_1	spine		x										18	spine			x
	23	spine			x								02_2	spine			x									22	spine	x
	24_1	spine			x								03	spine			x									23	spine		x
	25	spine			x								06	spine		x										24	spine	x
	27	spine			x								08	spine			x
	28	spine			x								09	spine			x								Hu_08	01	spine	x
	29	spine			x								10	spine			x									02	spine	x
	34	spine			x								13	spine		x										03	spine			x
	40	spine			x								15	spine			x									04	spine		x
	41	spine			x								18_1	spine		x										05	spine	x
	43	spine	x										18_2	spine		x										12	spine			x
	44	spine			x								19	spine			x									13	spine	x
	49	spine			x								30	spine		x										15	spine	x
	50	spine			x								31	spine			x									16	spine	x
	51	spine			x								33	spine		x										17	spine	x
	52	spine			x								34	spine		x										18	spine	x
	54	spine			x								36	spine	x											23	spine		x
	58	spine		x									37	spine	x											24	spine		x
	61	spine			x								39	spine			x									25	spine		x
	62	spine			x								40	spine	x
	63	spine			x								41	spine		x									Hu_09	01	spine		x
	68	spine			x								42	spine			x									02	spine	x
	69	spine			x								43	spine			x									03	spine		x
	70	spine	x										47	spine			x									04	spine			x
	71	spine			x								48	spine		x										05	spine		x
	76	spine		x									49	spine			x									06	spine		x
	78	spine			x								50	spine			x									07	spine	x
	79	spine	x										53	spine	x											08	spine	x
	82	spine			x								54	spine			x									09	spine	x
	85	Spine			x								55	spine			x									10	spine			x
	90	spine			x								56	spine			x									11	spine	x
	93	spine			x								58	spine			x									12	spine		x
	95	spine			x								61	spine			x									15	spine		x
	96	spine			x																					17	spine	x
	97	spine			x							Hu_04	01	spine			x									19	spine	x
													03	spine			x									21	spine		x
Hu_03	01	spine			x								05	spine			x									22	spine		x
	03	spine			x								11	spine			x
	06	spine			x								12	spine			x
	26	spine			x								13	spine		x
	27	spine			x								14_1	spine		x
	28	spine			x								14_2	spine	x
	29	spine			x								15	spine		x
	30	spine			x								16	spine			x
	31	spine			x								17	spine			x
	32	spine		x									19	spine		x
	33	spine			x								20	spine		x
	34	spine			x								21	spine			x
	37	spine		x									22	spine			x
	38	spine			x								23	spine			x
	41	spine			x								34	spine			x
	42	spine		x									35	spine			x
	43	spine			x								39	spine			x
	44	spine			x								40	spine			x
	47	spine			x								47	spine			x
	50	spine			x								48	spine			x
	52	spine			x								49	spine			x
	53	spine			x								50	spine		x
	54	spine			x								51	spine		x
	55	spine			x								52	spine			x
	56	spine			x								53	spine			x
	57	spine			x								54	spine			x
	59	spine			x								56_1	spine		x
	62	spine			x								56_2	spine		x
	67	spine			x								58_1	spine			x
	74	spine			x								61	spine			x
	75	spine			x								62	spine		x
	76	spine			x								63	spine		x
	77_2	spine			x
	78	spine		x
